# Supplementary material
Source: PubMed Central journal article supplement (PMC4089965)
Supplement: NIHMS609112-supplement-Supplementary_Information.pdf [file NIHMS609112-supplement-Supplementary_Information.pdf]

## **Genome-scale CRISPR-Cas9 knockout screening in human cells**

Ophir Shalem<sup>1,2,\*</sup>, Neville E. Sanjana<sup>1,2,\*</sup>, Ella Hartenian<sup>1</sup>, Xi Shi<sup>1,3</sup>, David A. Scott<sup>1,2</sup>,  
Tarjei Mikkelsen<sup>1</sup>, Dirk Heckl<sup>4</sup>, Benjamin L. Ebert<sup>4</sup>, David E. Root<sup>1</sup>, John G. Doench<sup>1</sup>, and  
Feng Zhang<sup>1, 2,†</sup>

<sup>1</sup> Broad Institute of Harvard and MIT

7 Cambridge Center

Cambridge, MA 02142, USA

<sup>2</sup> McGovern Institute for Brain Research

Department of Brain and Cognitive Sciences

Department of Biological Engineering

Massachusetts Institute of Technology

Cambridge, MA 02139, USA

<sup>3</sup> Stanley Center for Psychiatric Research

Broad Institute of Harvard and MIT

7 Cambridge Center

Cambridge, MA 02142, USA

<sup>4</sup> Division of Hematology,

Department of Medicine,

Brigham and Women's Hospital,

Harvard Medical School, Boston, MA 02115, USA

\*These authors contributed equally to this work.

†To whom correspondence should be addressed: [zhang@broadinstitute.org](mailto:zhang@broadinstitute.org).

## SUPPLEMENTARY DISCUSSIONS

*GeCKO screening is carried out in three steps*

**Step 1 – Library Design.** Constitutive exons near the 5' end of transcripts are identified using Illumina Human BodyMap 2.0 and NCBI CCDS datasets. sgRNAs were ranked by an off-target score using a metric that includes the number of off-targets in the genome and the type of mutations (distance from protospacer-adjacent motif and clustering of mismatches) and those with lowest off-target scores were selected. This resulted in a library in which most genes have an average of 3 or 4 sgRNAs.

**Step 2 – Viral vector generation.** The sgRNA library was synthesized using array synthesis and cloned as a pool into the lentiCRISPR transfer plasmid for virus production. Viral vectors were produced in HEK293T cells and concentrated to increase viral titer. Cells of interest were infected at a low MOI (0.3) to ensure that most cells receive only 1 viral construct with high probability.

**Step 3 – Readout.** 24 hours after transduction, cells were selected with puromycin so that only cells transduced with a lentiCRISPR construct are preserved. At this point the cells can be used to carry out either positive or negative selection screens.

*Screening timeline considerations*

After infection, cells are selected with puromycin. For most cell types, 0.5-2 ug/ml puromycin works well, although the minimum dose that kills all cells without any viral transduction should be determined in advance and the minimum concentration should be used for selection. Usually, only 2-3 days of puromycin selection is needed to select for cells with viral integration and expression but a longer period of selection has the added benefit of allowing for enough time for genome modification by Cas9.

As shown in the deep sequencing of the individual target (array) validations from the PLX resistance screen gene hits, genome modification increases over time. For most targets, genome modification was nearly complete after only 7 days. Some lentiCRISPRs had lower modification that increased by 14 days post-transduction (for example, NF1\_sg4 in fig. S14,

NF2\_sg5 in fig. S15). As expected, for some sgRNAs, off-target modification also increases with time, albeit by a smaller amount (for example, NF2\_sg4 in Fig. S14, MED12\_sg2 in Fig. S15). In general, it is advisable to keep puromycin selection (and Cas9 expression since they are co-expressed) for at least 7 days post-transduction and possibly longer depending on the needs of the particular experiment.

### *Identification of gene candidates*

Before any experiment, it is important to determine the distribution of sgRNAs before any selection pressure has been applied. This baseline sgRNA distribution will be used to infer either depletion or enrichment of specific sgRNA species.

For both positive and negative selection screens, hits are identified by comparing the distribution of sgRNAs after selection with the baseline sgRNA distribution. Candidate genes are identified by searching for sgRNAs whose frequency has either significantly reduced or increased after selection for negative and positive screens respectively.

Using multiple sgRNAs to target the same gene, and transduction replicates are the main experimental features that enable discrimination between true and false positive hits. The reason is that each screen will have some background rate, meaning that with some probability an sgRNA can be enriched (or depleted) despite having no effect on the studied phenotype. The required number of unique sgRNAs for the same genes should be determined by the background rate of the screen and the overall efficacy of sgRNAs. As increasing sgRNA numbers per gene comes with a cost of increasing library complexity, additional infection replicates can compensate for it as long as there is a minimal number of sgRNAs that can effectively mediate gene targeting.

Finally, ranking of the top hits requires the conversion of sgRNA scores into gene rankings. A simple method is to rank gene hits according to the mean or median of all sgRNAs for each respective gene. We recommend combining this simple method with other analysis such as RIGER (1) and RSA (2).

### *GeCKO versus shRNA screening*

GeCKO screening operates through a fundamentally different mechanism than shRNA based screening. Whereas shRNAs reduce protein expression by targeting the mRNA, GeCKO achieves protein knockdown via frameshift mutations introduced into the genomic coding region. GeCKO-mediated frameshift mutations are achieved through targeted DNA double strand breaks (DSB) and subsequent mutagenic repair via the non-homologous end joining (NHEJ) pathway, which produces indels at the site of DSB. The indel being introduced into the DSB is random (fig. S16), with some indels leading to frameshift mutations that cause premature termination of the transgene. Other indels with lengths that are multiples of three will not result in the frameshift of the candidate genes. In this scenario, the gene product might still be functional. In contrast, shRNA knockdown can generate a spectrum of expression levels of the target genes. Therefore GeCKO screening can provide potential advantages over shRNA, where the population of cells that has been homozygously knocked out can provide more screening sensitivity especially when probing gene products that can function normally even at significantly reduced concentrations.

### *Vemurafenib (PLX) resistance mechanisms*

The protein kinase BRAF, a key regulator of the MAPK signaling cascade, is mutated in more than half of malignant melanomas and in several other types of cancer, such as thyroid, colorectal, lung, and hairy cell leukemia (3). The V600E mutant form of BRAF is a common gain of function mutation that allows BRAF to remain in a constitutively active state and phosphorylate MEK without forming a phosphorylated BRAF dimer (4). Vemurafenib (PLX) is a FDA-approved, ATP-competitive RAF inhibitor that displays higher binding affinity for V600E mutant BRAF over other RAF isoforms, including wild-type BRAF (5). Over 50% of melanoma patients with mutated BRAF treated with PLX display tumor reduction, but the effect is short-lived and resistance develops in a majority of cases (6-8). By applying the GeCKO library to A375 cells (which are homozygous for the BRAF V600E mutation), we identified several genes whose loss resulted in resistance to PLX.

In the PLX screen, we identified and validated NF2, NF1, MED12, CUL3, TADA1, and TADA2B as genes whose loss results in PLX resistance. Loss of NF1 and MED12 were

previously identified resistance mechanisms from two separate, large-scale RNAi screens (9, 10). MED12, a member of the Mediator transcription complex, is a negative regulator of TGF- $\beta$ R and its loss results in activation of TGF- $\beta$ R signaling and MEK/ERK (10). NF1 is a negative regulator of NRAS activity and its loss phenocopies activating NRAS mutations (9, 11), an established PLX resistance mechanism (12, 13).

Although they have similar names, NF1 and NF2 are tumor suppressors that function via distinct pathways. NF2 (or Merlin, Moesin-Ezrin-Radixin-Like Protein) is a tumor suppressor gene that encodes a cytoskeletal protein (14). Loss of NF2 leads to constitutive mTOR activation and cell proliferation by a MEK/ERK-independent mechanism (15) and involves the Hippo signaling pathway (16, 17). Mutation and copy number variation of the E3 ligase CUL3 has been described in lung squamous cell carcinomas and renal cell carcinomas (18, 19). Quantitative proteomics in T24T bladder cancer cells found that silencing of CUL3 restored the expression of cytoskeleton proteins that are underexpressed in T24T, such as moesin and ezrin (20). This suggests a possible interaction between CUL3 and NF2/merlin, a similar cytoskeletal protein to those ubiquitinated by CUL3.

TADA1 and TADA2B are chromatin-modifying enzymes involved in transcription and are members of the multiprotein STAGA (SPT3-TAF9-GCN5-acetylase) complex. The STAGA complex recruits Mediator complex proteins (such as MED12) to the oncoprotein c-Myc to activate proliferation (21). Although we did not attempt to validate it, CCDC101 had a high RIGER rank in both infection replicates (see table S6) and is also a subunit of the STAGA complex and thus may lead to PLX resistance through a similar mechanism as TADA1 and TADA2B.

Since many of the gene hits from the PLX screen interact with each other and are involved in established cell proliferation pathways, therapeutics targeted to these pathways could be combined with BRAF inhibition to achieve better clinical outcomes in melanoma and other cancers.

### *Other applications of GeCKO screening*

In addition to facilitating loss-of-function gene screening, GeCKO and similar Cas9-sgRNA libraries can be customized to carry out a variety of genome-scale perturbations to study the effect of non-coding elements, transcriptional changes, and epigenetic modulations.

In this library, we target the constitutive exons near the 5' end of genes for loss-of-function but sgRNAs can also be targeted to promoters, enhancers, intronic, and intergenic regions. Screens targeting non-coding regions or a mix of coding and non-coding regions can elucidate how these different elements contribute to gene expression and biological function.

As we and other groups have recently shown (22-26), Cas9 with mutated catalytic residues can be fused to a transcriptional activation domain such as VP16 or repressor domain such as SID4X or KRAB to create a Cas9 transcriptional modulator without any nuclease activity. By replacing the Cas9 in the lentiCRISPR plasmid with a null-nuclease version (eg. with D10A and H840A mutations) (27, 28), libraries of sgRNAs for activation can be used to investigate how activation of different transcripts or different splice variants contribute to a screen phenotype. A null-nuclease Cas9 could also be fused with different effector domains capable of modifying the epigenetic state at a particular locus. Previous work from our group and others has demonstrated transcriptional changes using zinc-finger proteins and transcriptional activator like effectors (TALEs) fused to histone (de)acetylases, histone (de)methylases, DNA (de)methylases and other epigenetic modifiers (23, 29, 30). The easy programmability of Cas9 DNA binding using sgRNAs that can be array synthesized *en masse* opens up many new possibilities for genome-scale screens.

## SUPPLEMENTARY MATERIALS AND METHODS

### *GeCKO library design*

A genome-scale sgRNA library was constructed as follows: First, early constitutive exons were identified for all coding genes. Then, sgRNAs to target these early constitutive exons were selected by choosing sgRNAs that were predicted to have minimal off-target activity.

To identify constitutive exons, RNA sequencing data from the Illumina Human Body Map 2.0 (GEO accession number: GSE30611) was mapped to the reference human genome (hg19) using TopHat v1.0.14 (31) and transcripts were reconstructed with Cufflinks v1.0.2 (32), as previously described (33). Exons expressed across all tissues in the Illumina dataset were chosen as constitutive exons for sgRNA targeting. In addition, for each gene, the first and last exons were excluded along with any exon that contained an alternative splicing site.

For the constitutive exons, genomic sequences were retrieved from the NCBI Consensus CoDing Sequence database (<http://www.ncbi.nlm.nih.gov/CCDS/>). For each CCDS entry, the two earliest constitutive exons were chosen as candidate exons for library design. For genes without RNA sequencing data or where no exons qualified as constitutive, exons 2 and 3 were included as candidate exons for library design.

Next, for each candidate exon, all possible *S. pyogenes* Cas9 sgRNA sequences of the form (N)<sub>20</sub>NGG were listed as candidate targets. Each 20mer candidate sgRNA was mapped to a precompiled index containing all 20mer sequences in the human genome followed by either NGG or NAG. This mapping was done using Bowtie short read aligner (34), allowing up to 3 base mismatches.

The following heuristic was used to rank sgRNAs for each exon based on recent work that characterized the sequence specificity of Cas9 nuclease (25, 35, 36). First, any sgRNAs with other targets in the genome that match exactly or differ by only 1 base are discarded. For the remaining sgRNAs, we calculate the following off target score:

$$OS = \sum_{\text{of targets}} (\text{sum mm location}) \left( \frac{D(\text{mm})}{D(\text{max})} \right)$$

*sum mm location* = sum of the mismatch locations from 3' to 5'. The PAM (NGG) proximal base is 1 and the PAM distal base is 20.

*D(mm)* = distance in bp between mismatch locations.

*D(max)* = maximal possible distance between 2 or 3 mismatches.

When mismatches are clustered more closely together, the cutting efficiency of Cas9 is significantly lower (35). Therefore, in the *OS*, the location of mismatches is weighted by their distances from each other. For each gene, the best (lowest *OS*) sgRNAs were chosen with the constraint that no sgRNAs have a *OS*>400. This resulted in a library of 64,751 unique sgRNAs targeting 18,080 coding genes with an average of 3-4 sgRNAs per gene. For all sgRNAs, an extra 5' G was added to improve U6 transcription.

#### *Array oligo synthesis and pooled library cloning*

DNA oligonucleotide library synthesis was performed on a programmable microarray using a B3 Synthesizer (CustomArray) and SAFC Proligo reagents (Sigma), as recommended by the manufacturer. The synthesis products were cleaved from the microarray and deprotected by overnight incubation in 28-30% ammonium hydroxide at 65 °C, dried, resuspended in TE buffer and then purified using a QIAquick spin column (Qiagen). Full-length oligonucleotides (74 nt) were amplified by PCR using Phusion HS Flex (NEB) and size-selected using a 2% agarose E-Gel EX (Life Technologies, Qiagen).

|        |                                                                   |
|--------|-------------------------------------------------------------------|
| ArrayF | TAACCTGAAAGTATTTTCGATTTCTTGGCTTTATATATCTTGTGGAAAGGAC<br>GAAACACCG |
| ArrayR | ACTTTTTCAAGTTGATAACGGACTAGCCTTATTTTAACTTGCTATTTCT<br>AGCTCTAAAAC  |



The lentiCRISPR vector was digested with BsmBI (Fermentas) and treated with alkaline phosphatase (Fermentas) at 37°C for 2 hours and gel-purified on a 1 % E-Gel EX (Life Technologies, Qiagen). A 20 ul Gibson ligation reaction (NEB) was performed using 10 ng of the gel-purified inserts and 25 ng of the vector. From the ligation, 0.5 ul of the reaction was transformed into 25 ul of electrocompetent cells (Lucigen) according to the manufacturer's protocol using a GenePulser (BioRad). To ensure no loss of representation, 36 parallel transformations were performed using the same ligation reaction and plated onto 245 mm x 245 mm plates (Corning) with carbenicillin selection (50 ug/ml), which yielded 166 X library coverage. Colonies were scraped off plates and combined before plasmid DNA extraction using Endotoxin-Free Plasmid Maxiprep (Qiagen).

#### *Lentivirus production and purification*

To produce lentivirus, twelve T-225 flasks of HEK293T cells (Broad RNAi Platform) were seeded at ~40 % confluence the day before transfection in D10 media (DMEM supplemented with 10 % fetal bovine serum). One hour prior to transfection, media was removed and 13 mL of pre-warmed reduced serum OptiMEM media (Life Technologies) was added to each flask. Transfection was performed using Lipofectamine 2000 and Plus reagent (Life Technologies). For each flask, 200 ul of Plus reagent was diluted in 4 ml OptiMEM (Life Technologies) with 20 ug of lentiCRISPR plasmid library, 10 ug of pVSVg, and 15 ug of psPAX2 (Addgene). 100 ul of Lipofectamine 2000 was diluted in 4 ml OptiMEM and, after 5 min, it was added to the mixture of DNA and Plus reagent. The complete mixture was incubated for 20 min before being added to cells. After 6 h, the media was changed to 30 ml D10 supplemented with 1 % BSA (Sigma).

After 60 h, the media was removed and centrifuged at 3,000 rpm at 4 °C for 10 min to pellet cell debris. The supernatant was filtered through a 0.45 um low protein binding membrane (Millipore Steriflip HV/PVDF). To achieve 300 X concentration of the GeCKO pooled library, the virus was ultracentrifuged (Sorvall) at 24,000 rpm for 2 h at 4 °C and then resuspended overnight at 4 °C in D10 supplemented with 1% BSA. Aliquots were stored at -80°C.

### *Cell transduction using the GeCKO library*

Cells were transduced with the GeCKO library via spinfection. To find optimal virus volumes for achieving an MOI of 0.3–0.5, each new cell type and new virus lots were tested by spinfecting  $3 \times 10^6$  cells with several different volumes of virus. Briefly,  $3 \times 10^6$  cells per well were plated into a 12 well plate in the appropriate standard media for the cell type (see below) supplemented with 8 ug/ml polybrene (Sigma). For A375 cells (ATCC), standard media was R10: RPMI 1640 supplemented with 10 % FBS. For HUES62 (Harvard Stem Cell Institute iPS Core Facility), standard media consists of mTeSR1 (STEMCELL Technologies) supplemented with 1X Normocin (InvivoGen). Each well received a different titrated virus amount (usually between 5 and 50 ul) along with a no-transduction control. The 12-well plate was centrifuged at 2,000 rpm for 2 h at 37°C. After the spin, media was aspirated and fresh media (without polybrene) was added.

Cells were incubated overnight and then enzymatically detached using trypsin (Corning) for A375 and Accutase (STEMCELL) for HUES62. Cells were counted and each well was split into duplicate wells. One replicate received 0.5 ug/mL puromycin (Sigma) for HUES62 cells or 1 ug/ml puromycin for A375 cells. After 3 days (or as soon as no surviving cells remained in the no-transduction control under puromycin selection), cells were counted to calculate a percent transduction. Percent transduction is calculated as cell count from the replicate with puromycin divided by cell count from the replicate without puromycin multiplied by 100. The virus volume yielding a MOI closest to 0.4 was chosen for large-scale screening.

Large-scale spinfection of  $5 \times 10^7$  to  $1 \times 10^8$  A375 or HUES62 cells was carried out in the same way as described above using 12-well plates with  $3 \times 10^6$  cells per well. Wells were pooled together into larger flasks on the day after spinfection.

### *HUES62 depletion screen*

$6 \times 10^7$  HUES62 human embryonic stem (hES) cells were transduced as described above. 30uL of the concentrated GECKO library was applied to each well containing  $3 \times 10^6$  cells, resulting in an

transduction efficiency of 30 % (approximately 270 cells per lentiCRISPR construct). Puromycin (0.5 ug/mL) was added to the cells 24 hours post transduction and maintained for 7 days. On day 7, cells were split into replicate flasks with a minimum of  $2 \times 10^7$  cells per replicate and cultured for an additional 14 days before genomic DNA extraction and analysis. During the screen, hES cells were fed daily with mTeSR1.

#### *A375 PLX-4032 resistance screen*

$8 \times 10^7$  A375 cells were transduced as described above with  $2 \times 10^6$  cells plated per transduction well. 10 uL of the concentrated GECKO library was applied to each well containing  $2 \times 10^6$  cells, attaining a transduction efficiency of 30 % (approximately 370 cells per lentiCRISPR construct). Puromycin (1 ug/mL) was added to the cells 24 hours post transduction and maintained for 7 days. On day 7, cells were split into drug conditions in duplicate with a minimum of  $2.6 \times 10^7$  cells per replicate and an additional  $3 \times 10^7$  cells were frozen down for genomic DNA analysis. Two replicates were cultured in R10 supplemented with 2uM PLX4032 (Selleckchem) and two replicates were cultured in R10 supplemented with an equal volume DMSO (Sigma Aldrich). Replicates were either passaged or fresh media was added every 2-3 days. Cell pellets with a minimum of  $3 \times 10^7$  cells were taken at 7 days after drug addition and 14 days after drug addition at which point the screen was terminated.

#### *Genomic DNA sequencing*

Frozen cell pellets were thawed and genomic DNA was extracted with a Blood & Cell Culture Midi kit (Qiagen). PCR was performed in two steps: For the first PCR, the amount of input genomic DNA (gDNA) for each sample was calculated in order to achieve 300X coverage over the GECKO library, which resulted in 130 ug DNA per sample (assuming 6.6 ug of gDNA for  $10^6$  cells). For each sample, we performed 13 separate 100 ul reactions with 10 ug genomic DNA in each reaction using Herculase II Fusion DNA Polymerase (Agilent) and then combined the resulting amplicons. Primers sequences to amplify lentiCRISPR sgRNAs for the first PCR are:

F1     AATGGACTATCATATGCTTACCGTAACTTGAAAGTATTTTCG

R1 CTTTAGTTTGTATGTCTGTTGCTATTATGTCTACTATTCTTTCC

A second PCR was performed to attach Illumina adaptors and to barcode samples. The second PCR was done in a 100 ul reaction volume using 5ul of the product from the first PCR. Primers for the second PCR include both a variable length sequence to increase library complexity and an 8bp barcode for multiplexing of different biological samples:

F2 AATGATACGGCGACCACCGAGATCTACACTCTTTCCCTACACGACGCTCTTCCGATCT  
(1-9bp variable length sequence) (8bp  
barcode) tcttgtggaaaggacgaaacaccg

R2 CAAGCAGAAGACGGCATAACGAGATGTGACTGGAGTTCAGACGTGTGCTCTTCCGATCT  
tctactattctttcccctgcactgt

Resulting amplicons from the second PCR were gel extracted, quantified, mixed and sequenced using a HiSeq 2500 (Illumina). Amplification was carried out with 18 cycles for the first PCR and 24 cycles for the second PCR.

#### *Data processing and initial analysis*

Raw FASTQ files were demultiplexed using the FASTX-Toolkit ([http://hannonlab.cshl.edu/fastx\\_toolkit/](http://hannonlab.cshl.edu/fastx_toolkit/)) and processed to contain only the unique sgRNA sequence. To align the processed reads to the library, the designed sgRNA sequences from the library were assembled into a Burrows-Wheeler index using the Bowtie build-index function. Reads were then aligned to the index using the Bowtie aligner. After alignment, the number of uniquely aligned reads for each library sequence was calculated.

The numbers of reads for each unique sgRNA for a given sample were normalized as follows:

$$\text{normalized reads per sgRNA} = \frac{\text{reads per sgRNA}}{\text{total reads for all sgRNAs in sample}} \times 10^6 + 1$$

### *Array lentiCRISPR array screen*

Individual lentiCRISPRs from the GECKO pool were produced as above except that viral supernatants were not concentrated by ultracentrifugation. For each lentiCRISPR,  $5 \times 10^5$  A375 cells were infected via spinfection at 2,000 rpm for 2 h at 37°C in R10 supplemented with 8 µg/ml polybrene. After 14 days of puromycin selection, infections were plated into separate dishes for Western blotting and the cell viability assay.

### *Western blotting*

A375 cells were lysed in Cell Lysis Buffer (Cell Signaling 9803) with protease inhibitors (Sigma P8340). Lysates were homogenized using a Bioruptor sonicator (Diagenode) for 5 minutes (30s on-30s off cycle, high power) and then centrifuged at 15,000 rpm for 20 min at 4 °C. Supernatants were quantified using the BCA assay (Thermo/Pierce). 20 µg of protein was denatured at 70°C for 10 minutes before gel electrophoresis on a 4-12 % Bis-Tris gel (Life Technologies). Proteins were transferred to nitrocellulose membranes at 60V overnight at 4 °C. Antibodies used: Anti-NF2 (1:1000, Abcam ab109244), Anti-NF1 (1:1000, Abcam ab17963 ), Anti-MED12 (1:1000, Cell Signaling 4529S), Anti-CUL3 (1:1000, Cell Signaling 2759S), Anti-TADA2B (1:1000, Sigma HPA035770), Anti-GAPDH (1:5000, Cell Signaling 3683S). Membranes were developed by SuperSignal West Femto ECL (Thermo/Pierce) and imaged using BioRad ChemiDoc MP imaging system.

### *Cell viability assay*

lentiCRISPR-infected A375 cells were plated in quadruplicate into 96-well plates at a density of  $5 \times 10^3$  cells per well. Either PLX or vehicle (DMSO) was added 1 day after plating. PLX was added at the following concentrations: 20 nM, 200 nM, 2 µM, 20 µM, and 200 µM. Drug/vehicle was renewed every 2-3 days using a Janus liquid handler (PerkinElmer).

After 5 days of drug/vehicle treatment, cell viability was measured using CellTiter Glo (Promega). After allowing cells to reach room temperature, media was aspirated from the cells

and CellTiter Glo (diluted 1:4 in phosphate-buffered saline) was added. Plates were placed on an orbital shaker for 2 min followed by a 10 min room temperature incubation. Luminescence was read out on an EnVision plate imager (PerkinElmer).

*Flow cytometry analysis of GFP knockout or knockdown*

lentiCRISPR with sgRNAs targeting EGFP were cloned using the following sequences (annotated in fig. S1):

|              |                      |
|--------------|----------------------|
| EGFP sgRNA 1 | GGGCGAGGAGCTGTTACCG  |
| EGFP sgRNA 2 | GAGCTGGACGGCGACGTA   |
| EGFP sgRNA 3 | GGCCACAAGTTCAGCGTGTC |
| EGFP sgRNA 4 | GGAGCGCACCATCTTCTTCA |
| EGFP sgRNA 5 | GAAGTTCGAGGGCGACACCC |
| EGFP sgRNA 6 | GGTGAACCGCATCGAGCTGA |

Four shRNAs targeting EGFP in a pLKO (puromycin-selectable) vector were used (Broad RNAi Platform):

|              |                |
|--------------|----------------|
| EGFP shRNA 1 | TRCN0000072194 |
| EGFP shRNA 2 | TRCN0000072181 |
| EGFP shRNA 3 | TRCN0000072201 |
| EGFP shRNA 4 | TRCN0000072198 |

Control lentiCRISPR contained no spacer sequence and control shRNA was null hairpin TRCN0000208001.

For both lentiCRISPRs and shRNAs, virus was produced using a similar protocol as presented above but without ultracentrifuge purification. HEK293T cells with a single copy of EGFP (Broad RNAi Platform) were infected on Day 0 and then analyzed by flow cytometry on Day 5 and Day 11 post-infection. Flow cytometry was performed on a BD Accuri C6 cytometer in 96-well plates. Analysis was done in FlowJo (Treestar) by first gating for viable cells using forward and side scatter and then gating the fluorescence histogram.

### *Sequencing data analysis and indel detection*

Off target loci in the human genome were identified for individual spacers using the CRISPR design tool (<http://tools.genome-engineering.org>) (37). On-target and off-target loci were PCR amplified using Herculase II Fusion polymerase (Agilent), normalized, and pooled in equimolar proportions. Pooled libraries were denatured, diluted to a 14pM concentration and sequenced using the MiSeq Personal Sequencer (Illumina). Sequencing data was demultiplexed using paired barcodes, aligned to reference amplicons, and analyzed for indels as described previously (35). Indel length analysis was performed by mapping the distance between multiple short reference sequences in individual reads.

## SUPPLEMENTARY FIGURES

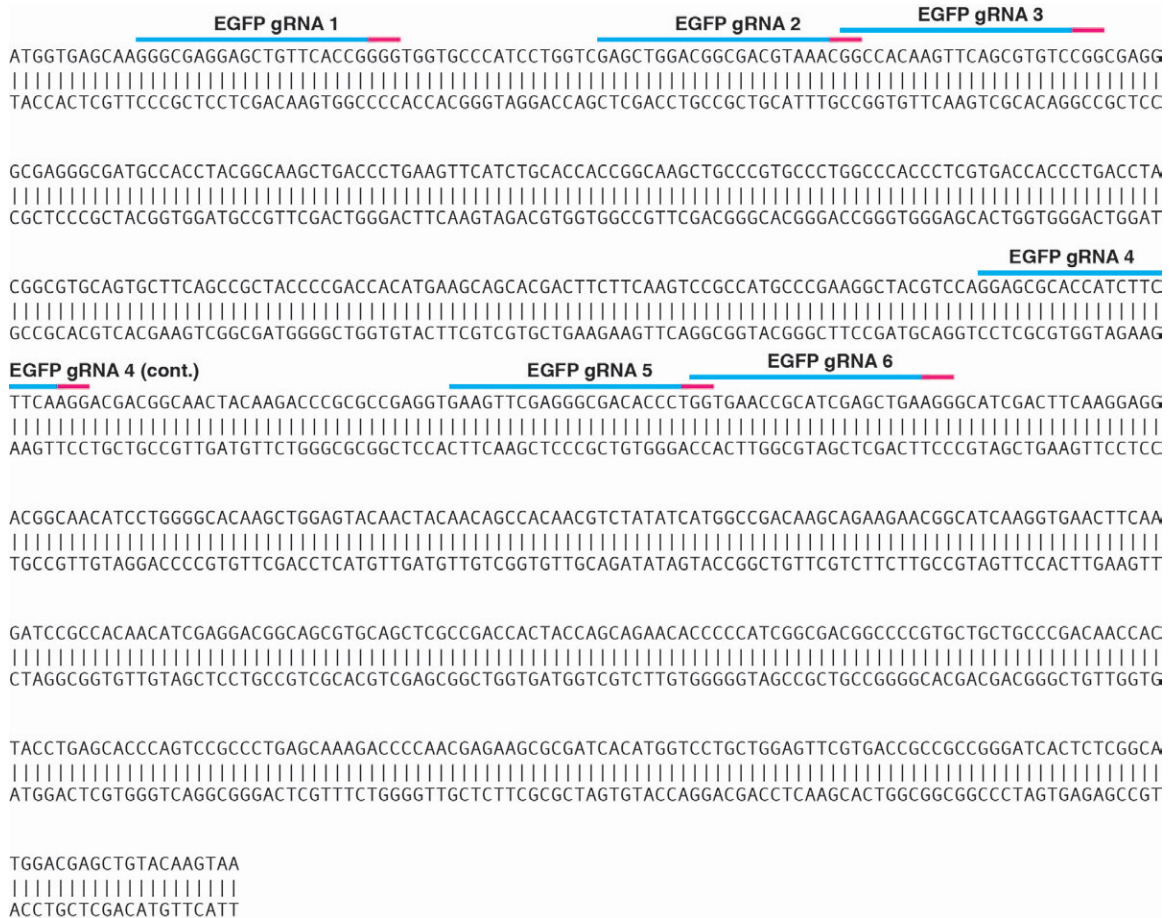

**Fig. S1 | Design of sgRNAs to knock out EGFP**

EGFP sequence is shown with six different sgRNAs that were designed to target the coding sequence.



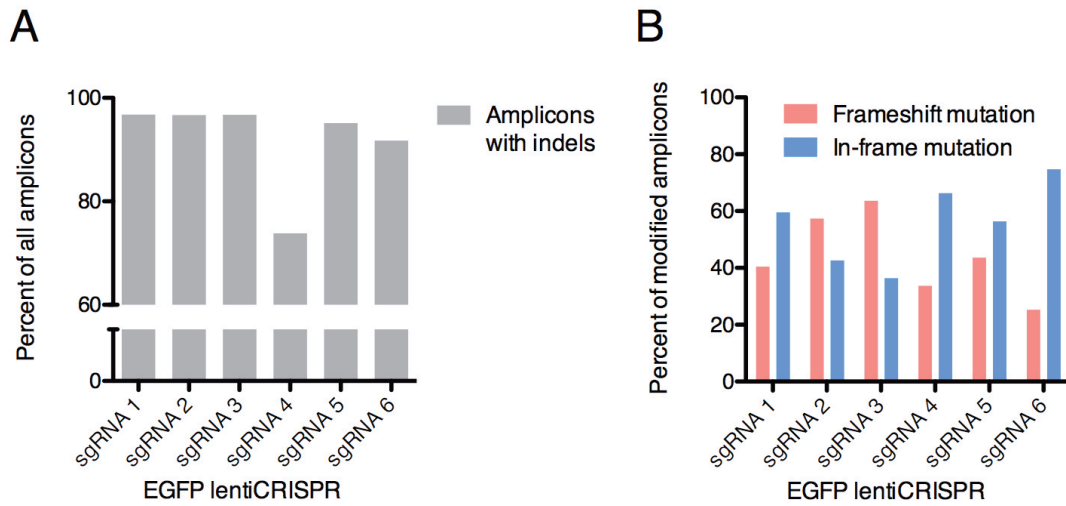

**Fig. S2 | Deep sequencing for indel analysis of EGFP locus after lentiCRISPR modification**

(A) Deep-sequencing of genomic DNA from HEK293T-EGFP cells that were infected with EGFP-targeting lentiCRISPRs shows that most amplicons have insertion or deletion (indel) mutations. Genomic DNA was extracted from cells on day 11 post-infection. For each lentiCRISPR,  $1-2 \times 10^4$  reads were used for the analysis. (B) Distribution of types of indel mutations. lentiCRISPR transduction leads to both frameshift and in-frame indel mutations.

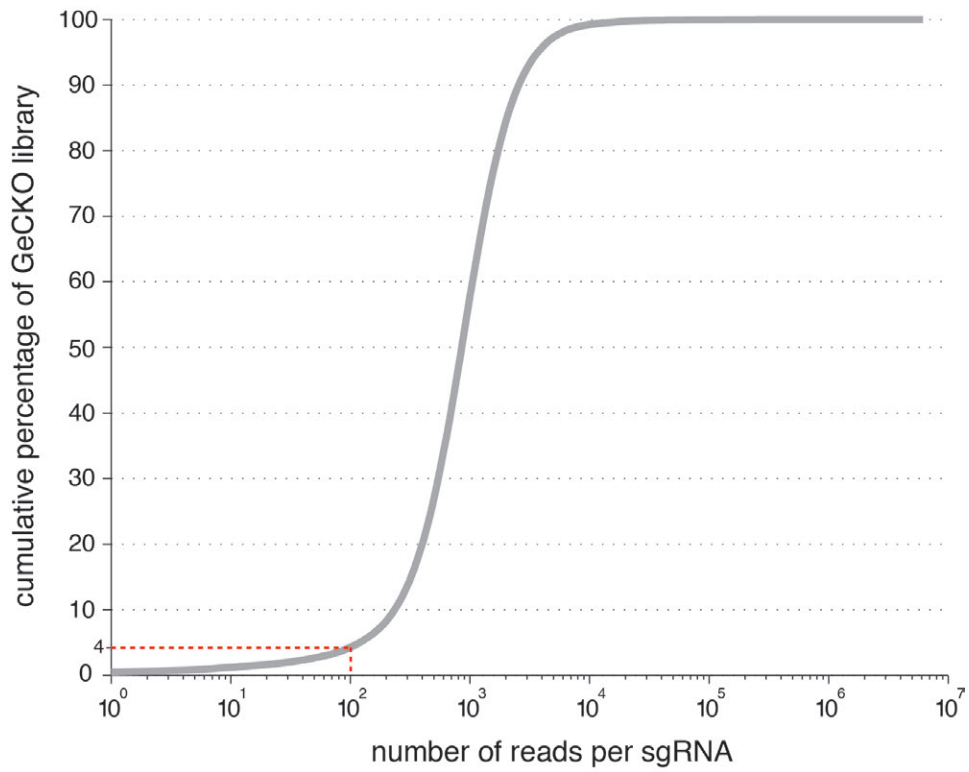

**Fig. S3 | Read coverage per sgRNA in a single experiment**

Cumulative distribution of the number of reads per sgRNA in a single A375 experiment. The red line indicates that less than 4% of the sgRNAs are covered by less than 100 reads.

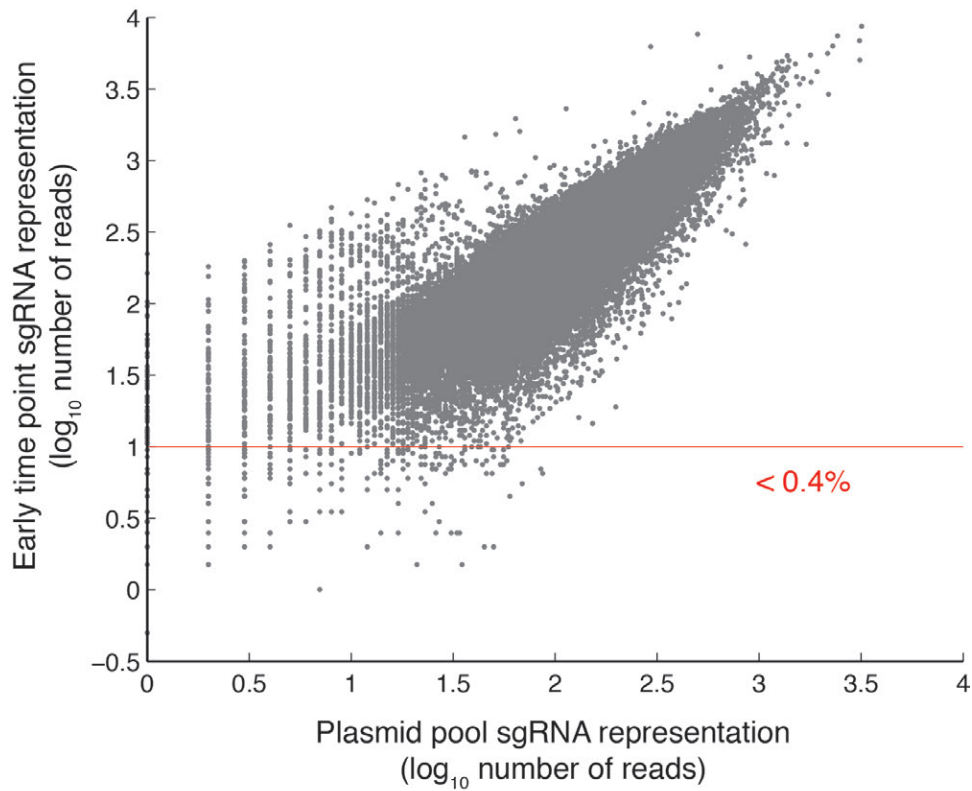

**Fig. S4 | Comparison of sgRNA representation between the plasmid pool to an early time point (day 7)**

Scatter plot of sgRNA representation ( $\log_{10}$  number of reads) between the plasmid pool before virus production to a cell population 7 days post infection. Red line indicates that less than 0.4% of sgRNA have undetectable representation (less than 10 reads).

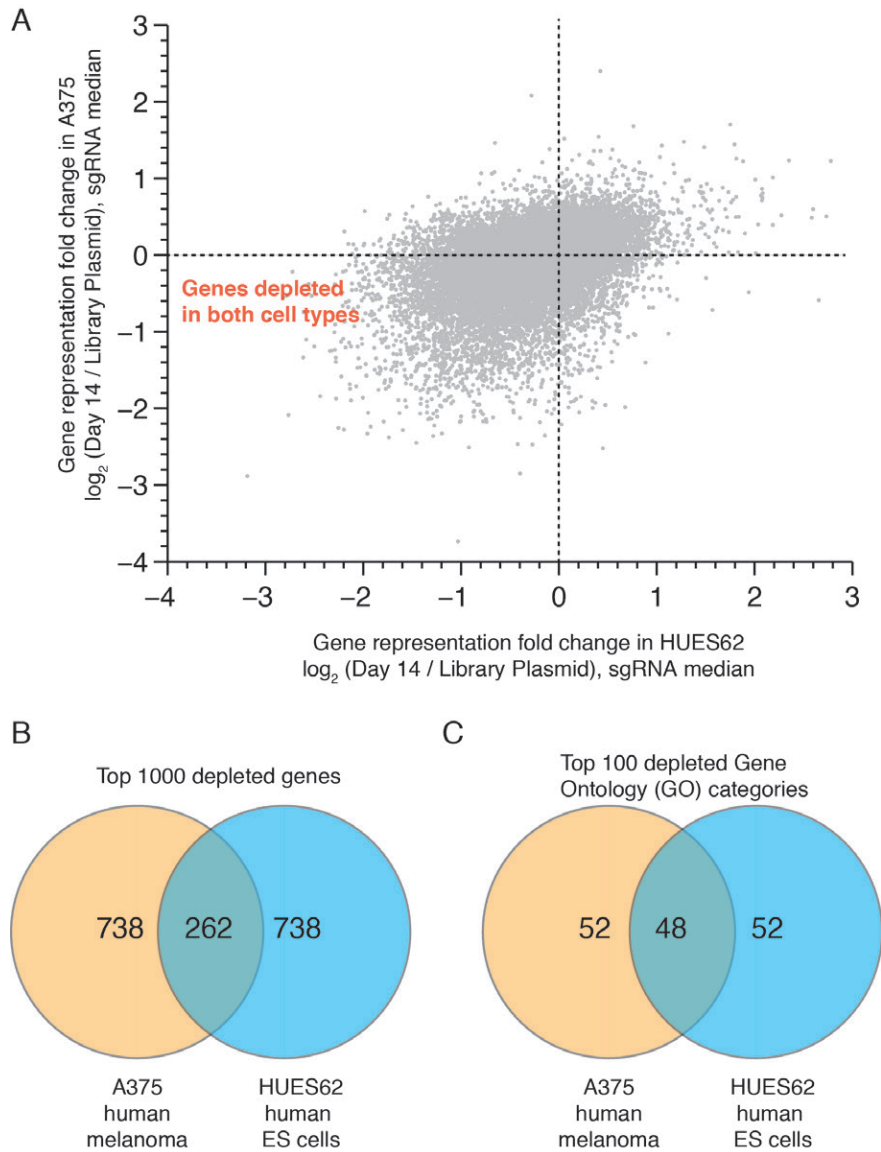

**Fig. S5 | Comparison of gene and gene category depletion between A375 melanoma and HUES62 human ES cells**

(A) Scatter plot of gene enrichment/depletion as  $\log_2$  fold change of each gene between cells 14 days post-transduction and initial library plasmid in A375 melanoma cells and HUES62 hES cells. Gene enrichment/depletion was calculated using RIGER analysis of individual sgRNA depletion. Lower left quadrant contains genes depleted in both A375 and HUES62 cells. (B) Overlap between the top 1000 most depleted genes in each cell type. (C) Overlap between the top 100 most depleted Gene Ontology (GO) categories for each cell type as ranked by Gene Set Enrichment Analysis (GSEA) on the gene enrichment/depletion values.

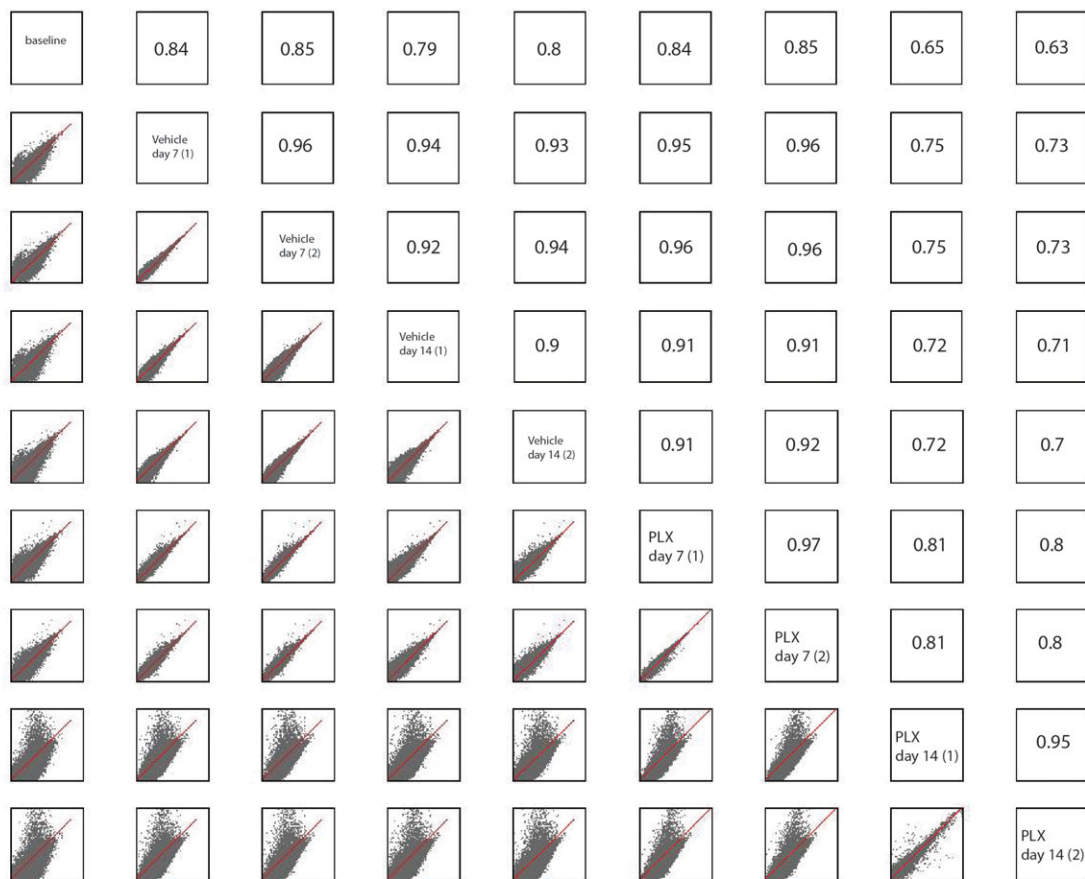

**Fig. S6 | Comparison of different treatment conditions and biological replicates in the first A375 PLX screen**

Each square in the lower left half of the matrix compares the normalized sgRNA read count between two biological samples. Sample labels for each axis are indicated on the diagonal. For example, the box on the second row from the bottom and third column from the right compares PLX day 7 (2) on the x-axis with PLX day 14 (1) on the y-axis. The Pearson correlation coefficient for comparison  $(i,j)$  can be found in box  $(j,i)$ ; for the example described in the previous sentence, the correlation coefficient is 0.81.

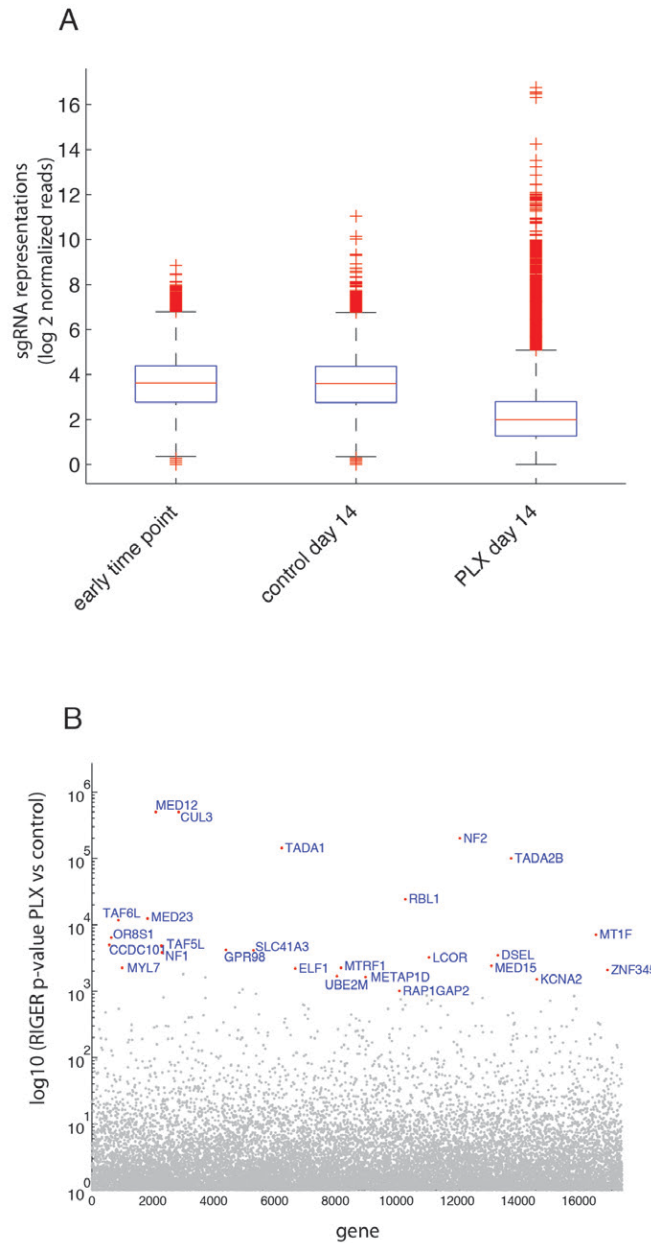

**Fig. S7 | sgRNA and gene enrichment from the second A375 PLX screen**

(A) Boxplot showing the distribution of reads from individual sgRNAs for the early timepoint, DMSO treated control, and PLX-4023 (PLX) treatment. The box extends from the first to the third quartile with the whiskers denoting 1.5 times the interquartile range. After 14 days of PLX treatment, while there is a decrease in the average number of reads per sgRNA, there is an increase in the number of reads for the most abundant sgRNAs. (B) Plot of the RIGER  $p$  value for genes enriched in PLX compared to vehicle control.

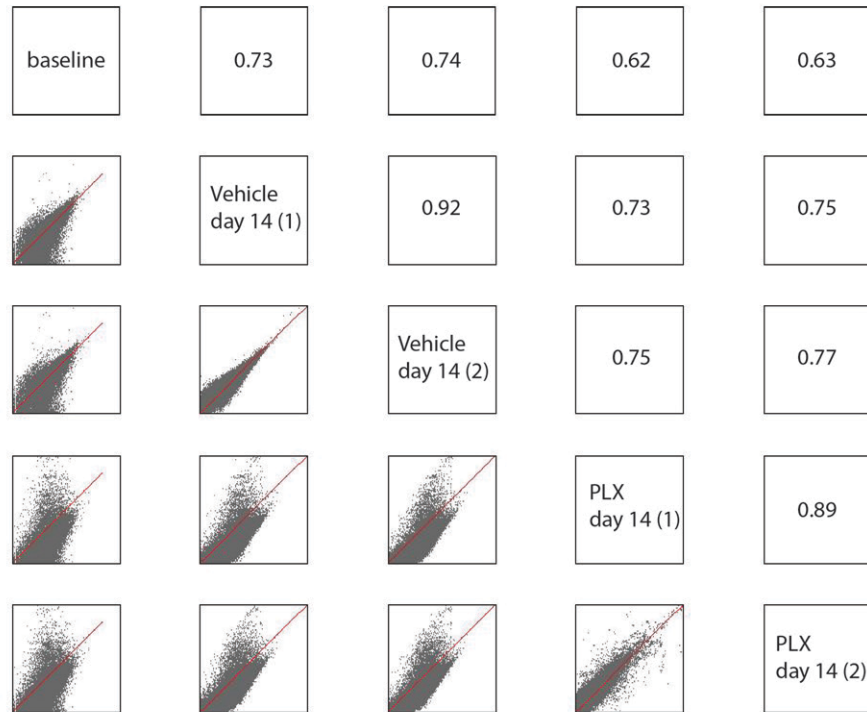

**Fig. S8 | Comparison of different treatment conditions and biological replicates in the infection replicate A375 screen**

Each square in the lower left half of the matrix compares the normalized sgRNA read count between two biological samples. Sample labels for each axis are indicated on the diagonal. For example, the box on the second row from the bottom and third column from the right compares Vehicle day 14 (2) on the x-axis with PLX day 14 (1) on the y-axis. The Pearson correlation coefficient for comparison  $(i,j)$  can be found in box  $(j,i)$ ; for the example described in the previous sentence, the correlation coefficient is 0.75.

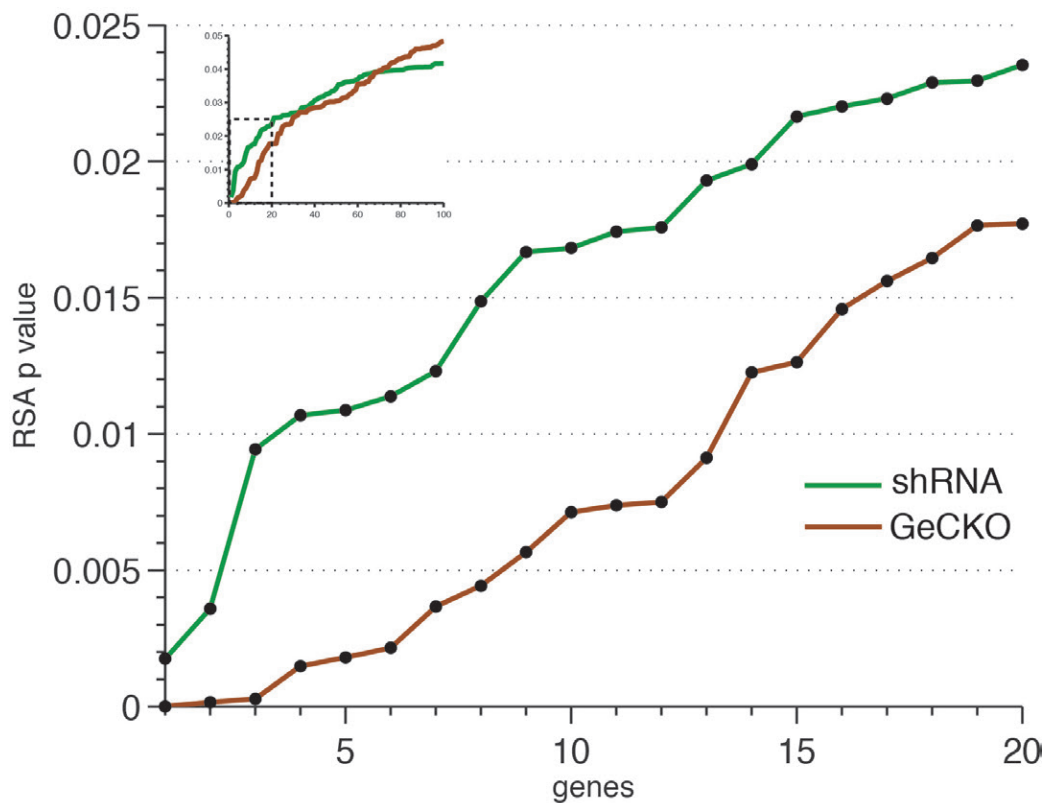

**Fig. S9 | Cumulative  $p$  value distribution for the top hits as determined by the Redundant siRNA Activity (RSA) algorithm**

Lower  $p$  values signify a higher consistency of distinct reagents targeting the same genes. RSA calculates the significance of reagents concentrated near the top or bottom of an enrichment list through an iterative hypergeometric test (2).



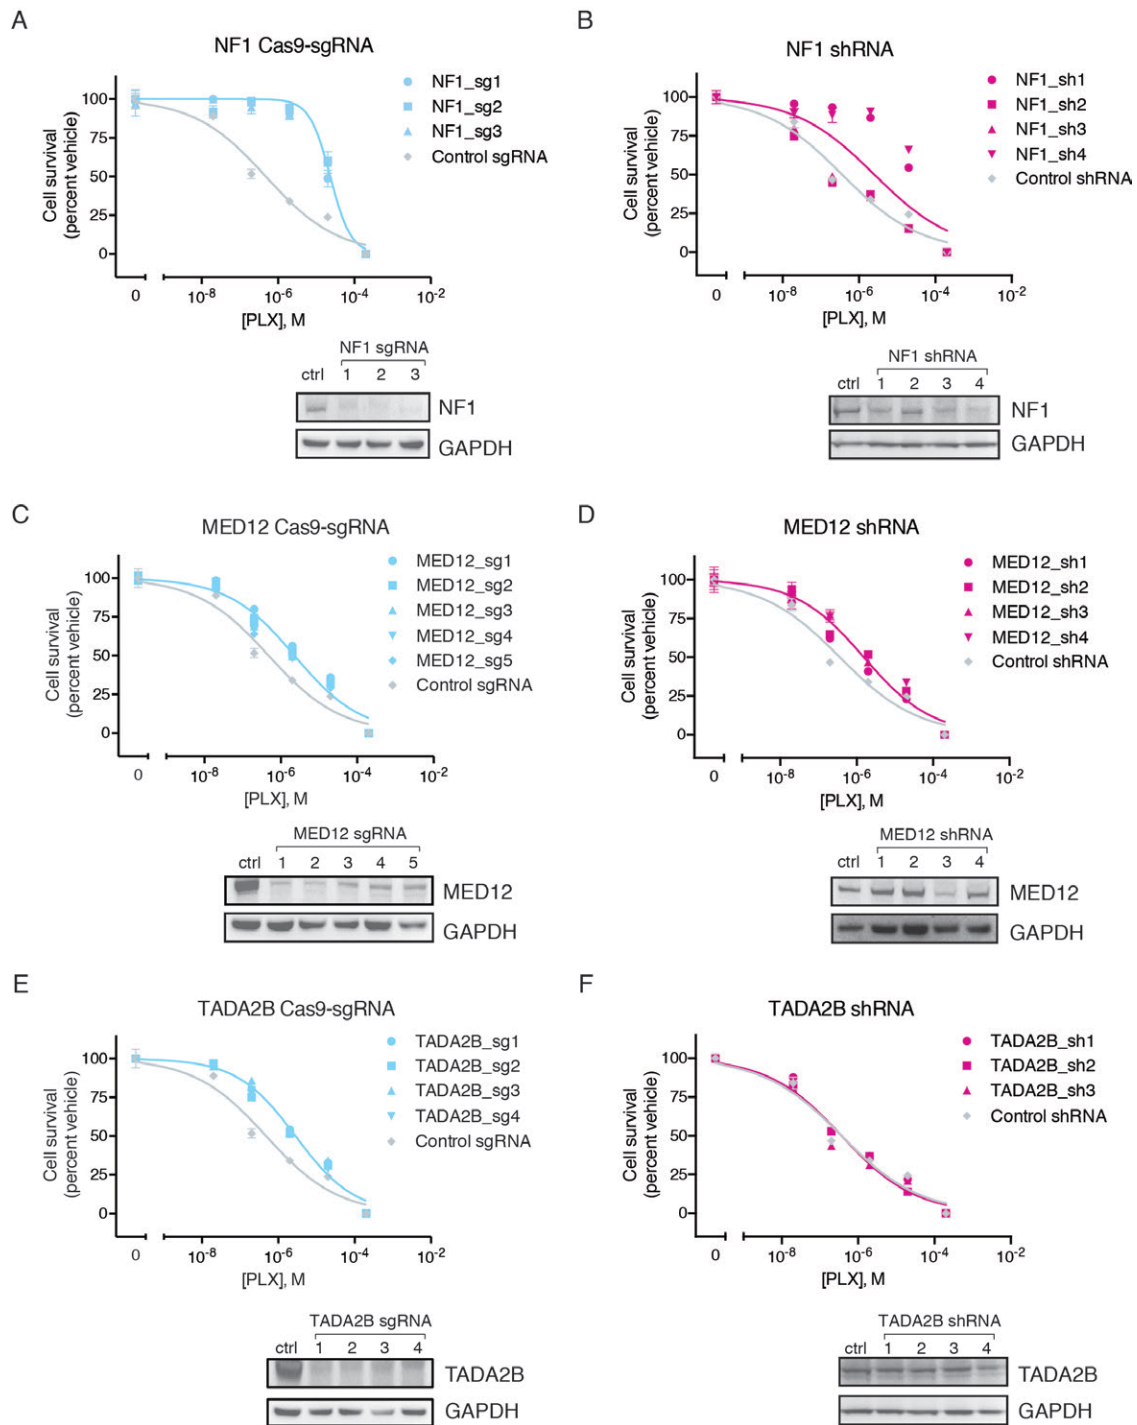

**Fig. S10 | Array validation and comparison of the three highest-ranking genes using both CRISPR and shRNAs**

Each panel shows cell survival data at different PLX doses as determined by CellTiter-Glo and protein quantification using western analysis. The gray line shows the mean of 2 control sgRNAs

(targeting EGFP) or 2 control shRNAs (pLKO-nullT control vectors) and the colored line (blue for Cas9-sgRNAs, pink for shRNAs) shows the mean of all targeting reagents for the gene.  $n=4$  replicates for dose response data. Shift in the dose response curve to the right of the control curve indicates greater resistance to PLX in the perturbed cell lines. (A), (B) Cas9-sgRNA and shRNA reagents respectively targeting *NF1*. (C), (D) Cas9-sgRNA and shRNA reagents respectively targeting *MED12*. (E), (F) Cas9-sgRNA and shRNA reagents respectively targeting *TADA2B* gene.

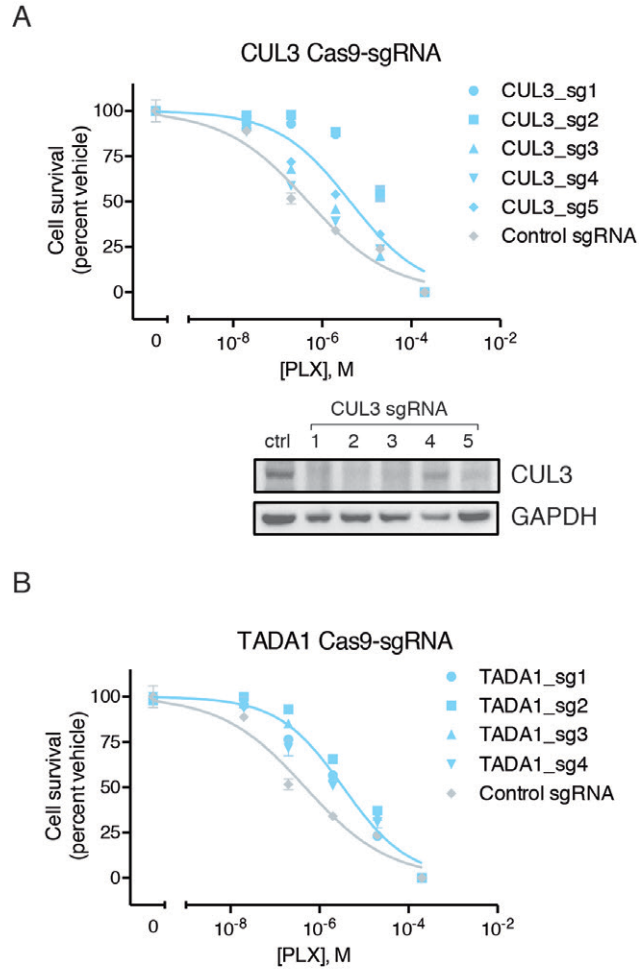

**Fig. S11 | Array validation of the two additional high-ranking genes**

Each panel shows cell survival data at different PLX doses as determined by CellTiter-Glo and protein quantification using western analysis. The gray line shows the mean of 2 control sgRNAs that target *EGFP* and the blue line shows the mean of Cas9-sgRNAs targeted to the gene. Shift in the dose response curve displays the reduced sensitivity to PLX in the perturbed cell lines. **(A)** Cas9-sgRNAs targeting *CUL3*. **(B)** Cas9-sgRNAs targeting *TADA1*. Western analysis was not performed for *TADA1* since neither of the two antibodies attempted yielded a band of the correct molecular weight.

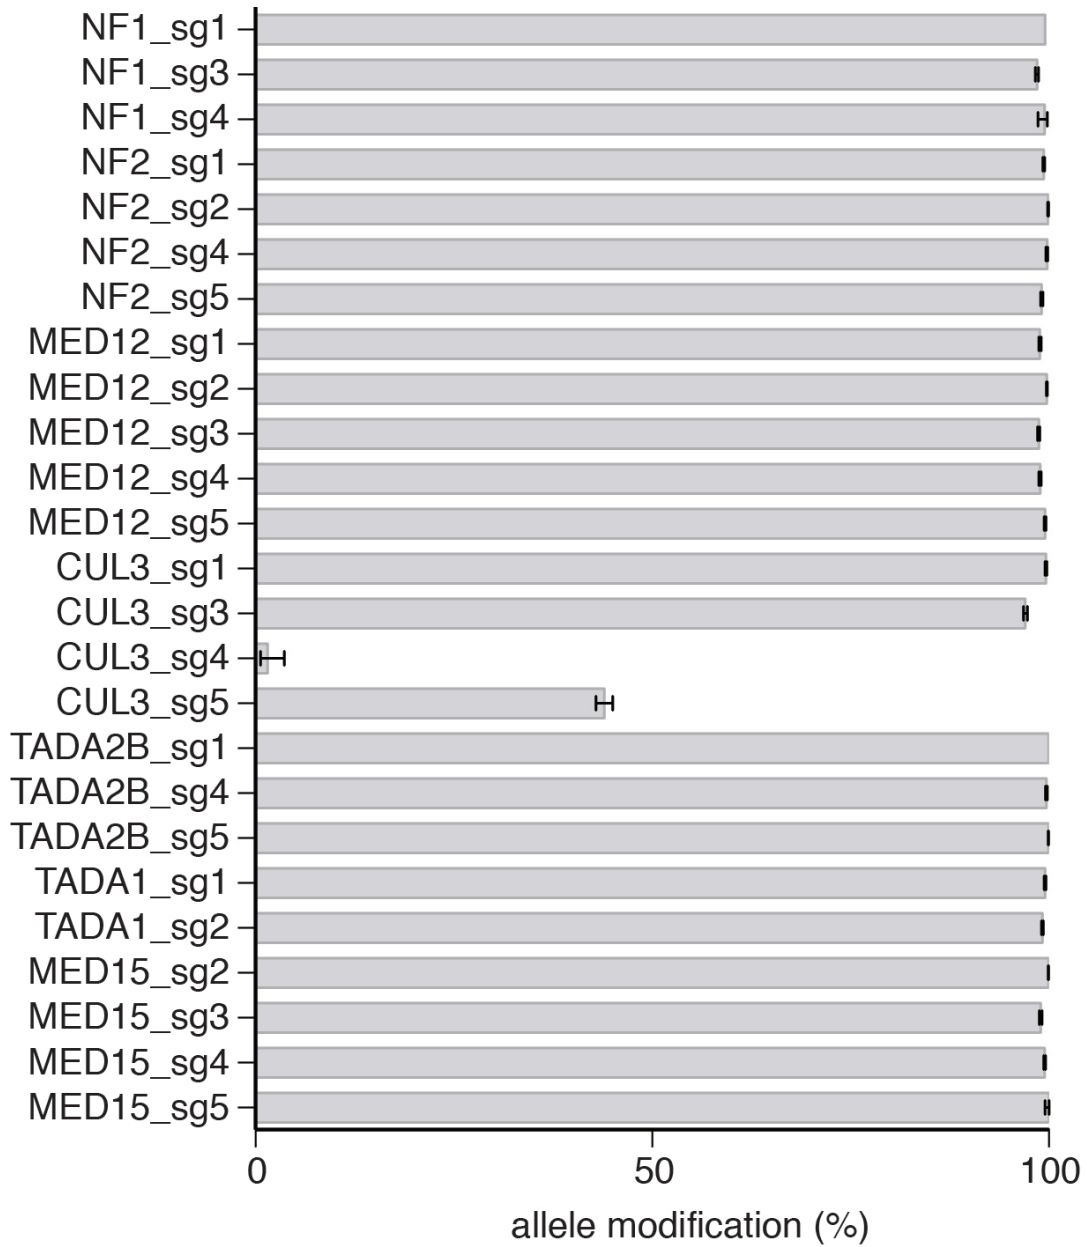

**Fig. S12 | Measurements of allele modification frequencies in 25 sgRNAs targeting the seven highest-ranking genes in the A375 GeCKO screen**

Bar plot shows the percentage of modified alleles determined by PCR followed by deep sequencing. Error bars representing Wilson intervals (as in (35)).

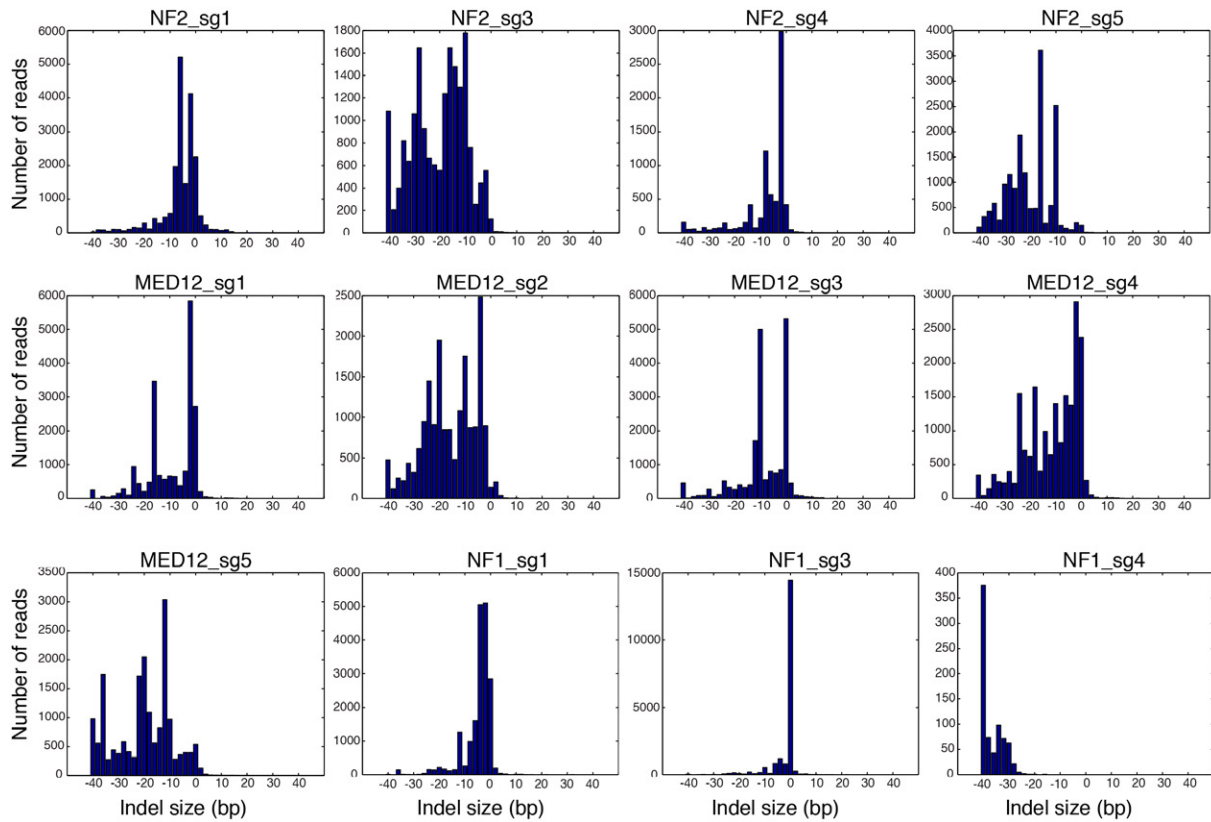

**Fig. S13 | Histograms of on-target indel sizes for *NF2*, *MED12*, and *NF1***

Each subpanel shows the distribution of indel sizes for a single sgRNA at its intended genomic target locus. Each locus is PCR amplified and deep sequenced. Negative values indicate deletions and positive values indicate insertions.

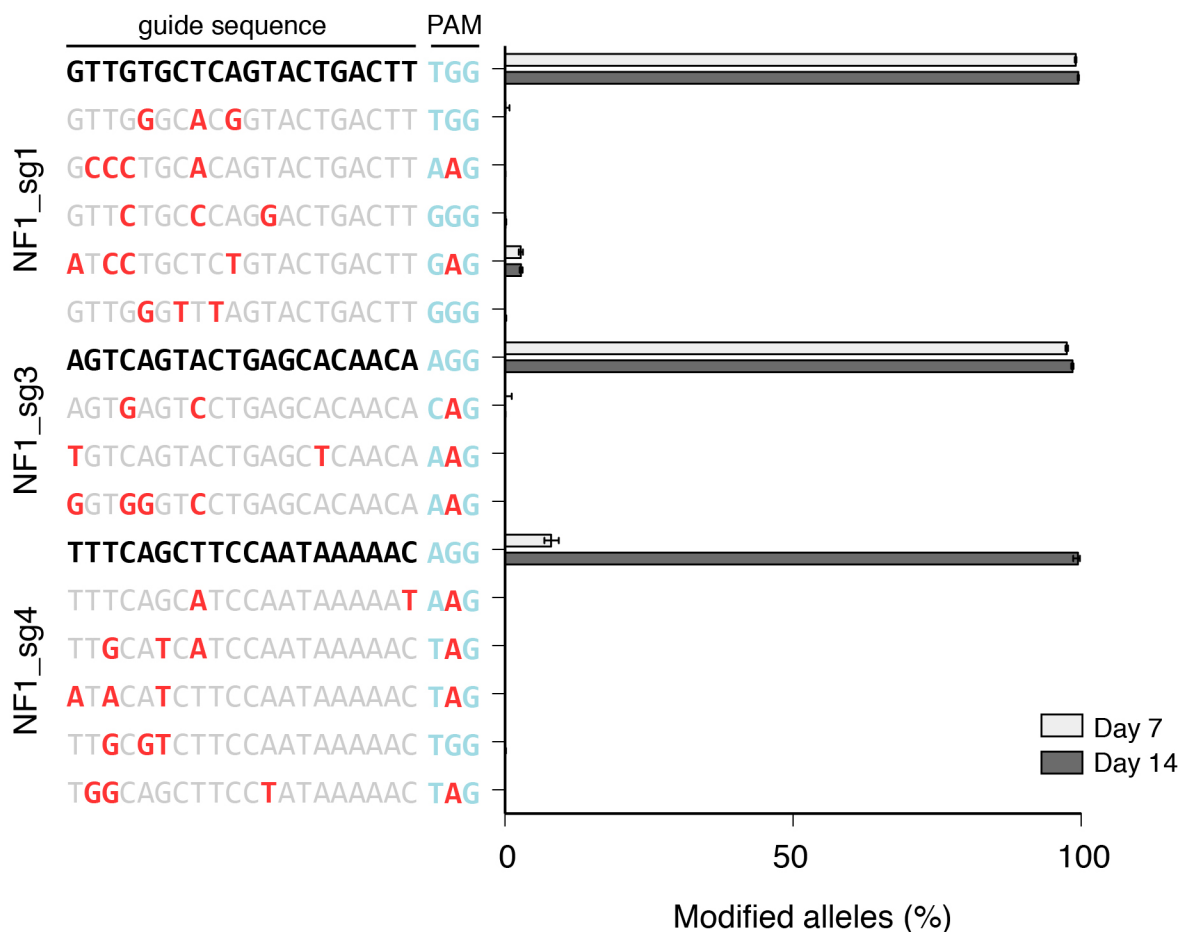

**Fig. S14 | Measurements of on and off target allele modification frequencies for three sgRNAs targeting *NF1***

Each row represents a genomic locus consisting of a 20bp sgRNA site (in black or gray letters) followed by a 3bp PAM sequence (in light blue letters). Sequences in bold black letters indicate the genomic sequences that the GeCKO library sgRNAs were designed to target. Below each bold line are 3 to 5 predicted potential off target genomic sequences identified using the CRISPR design tool (<http://tools.genome-engineering.org>) (37). Red nucleotides highlight the differences in these off target sequences from the on target site. Each locus (on and off target) was PCR amplified and then deep sequenced. Bars show the percentage of modified alleles 7 and 14 days post transduction with error bars representing Wilson intervals (as in (35)).

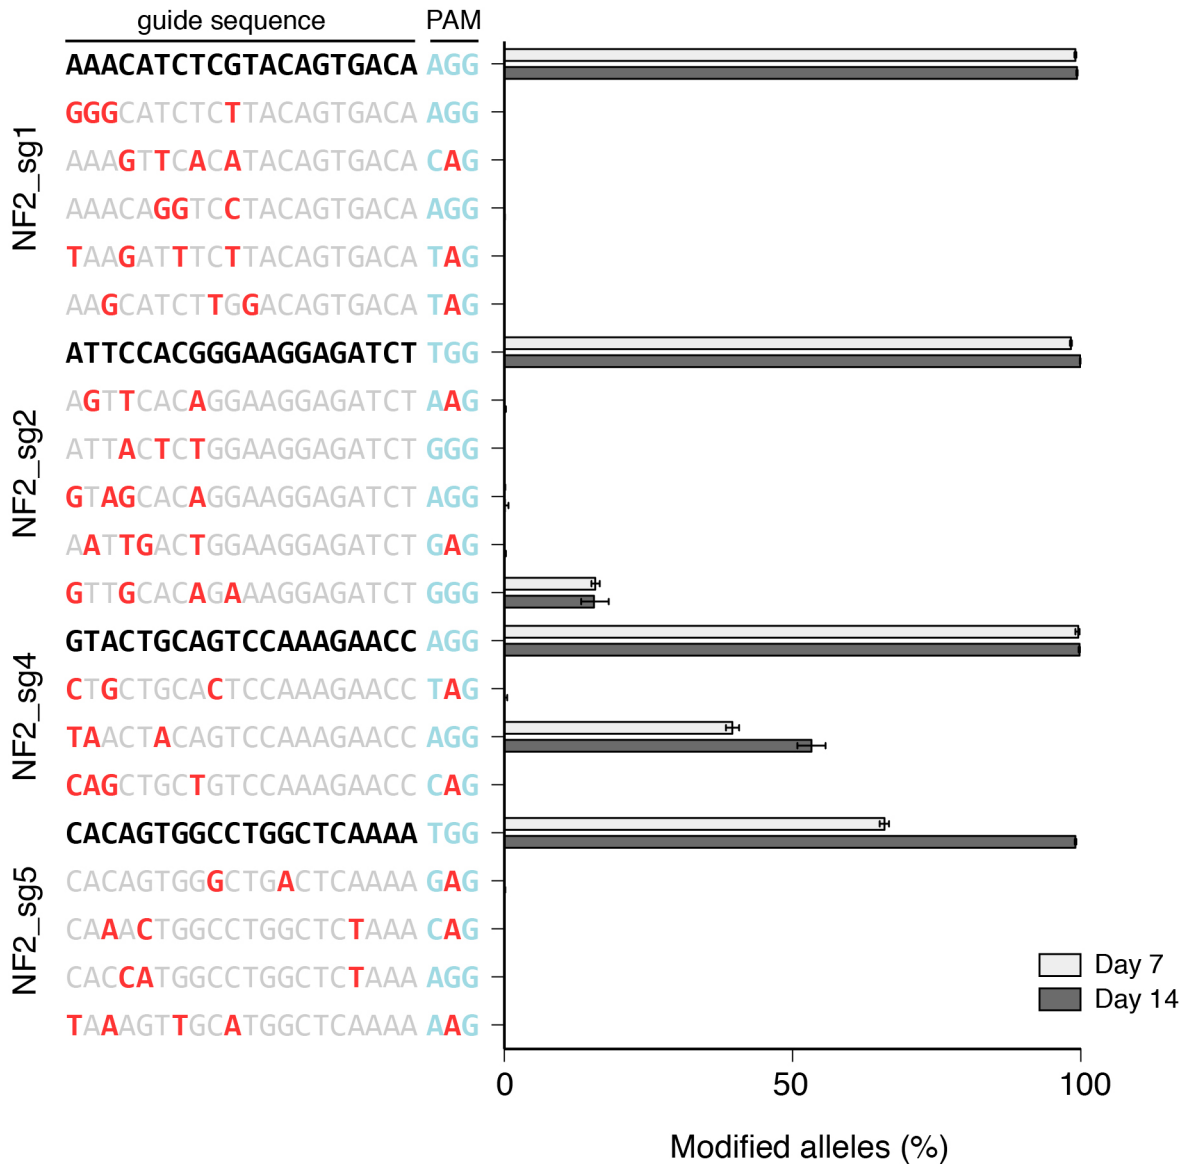

**Fig. S15 | Measurements of on and off target allele modification frequencies for three sgRNAs targeting *NF2***

Each row represents a genomic locus consisting of a 20bp sgRNA site (in black or gray letters) followed by a 3bp PAM sequence (in light blue letters). Sequences in bold black letters indicate the genomic sequences that the GeCKO library sgRNAs were designed to target. Below each bold line are 3 to 5 predicted potential off target genomic sequences identified using the CRISPR design tool (<http://tools.genome-engineering.org>) (37). Red nucleotides highlight the differences in these off target sequences from the on target site. Each locus (on and off target) was PCR amplified and then deep sequenced. Bars show the percentage of modified alleles 7 and 14 days post transduction with error bars representing Wilson intervals (as in (35)).

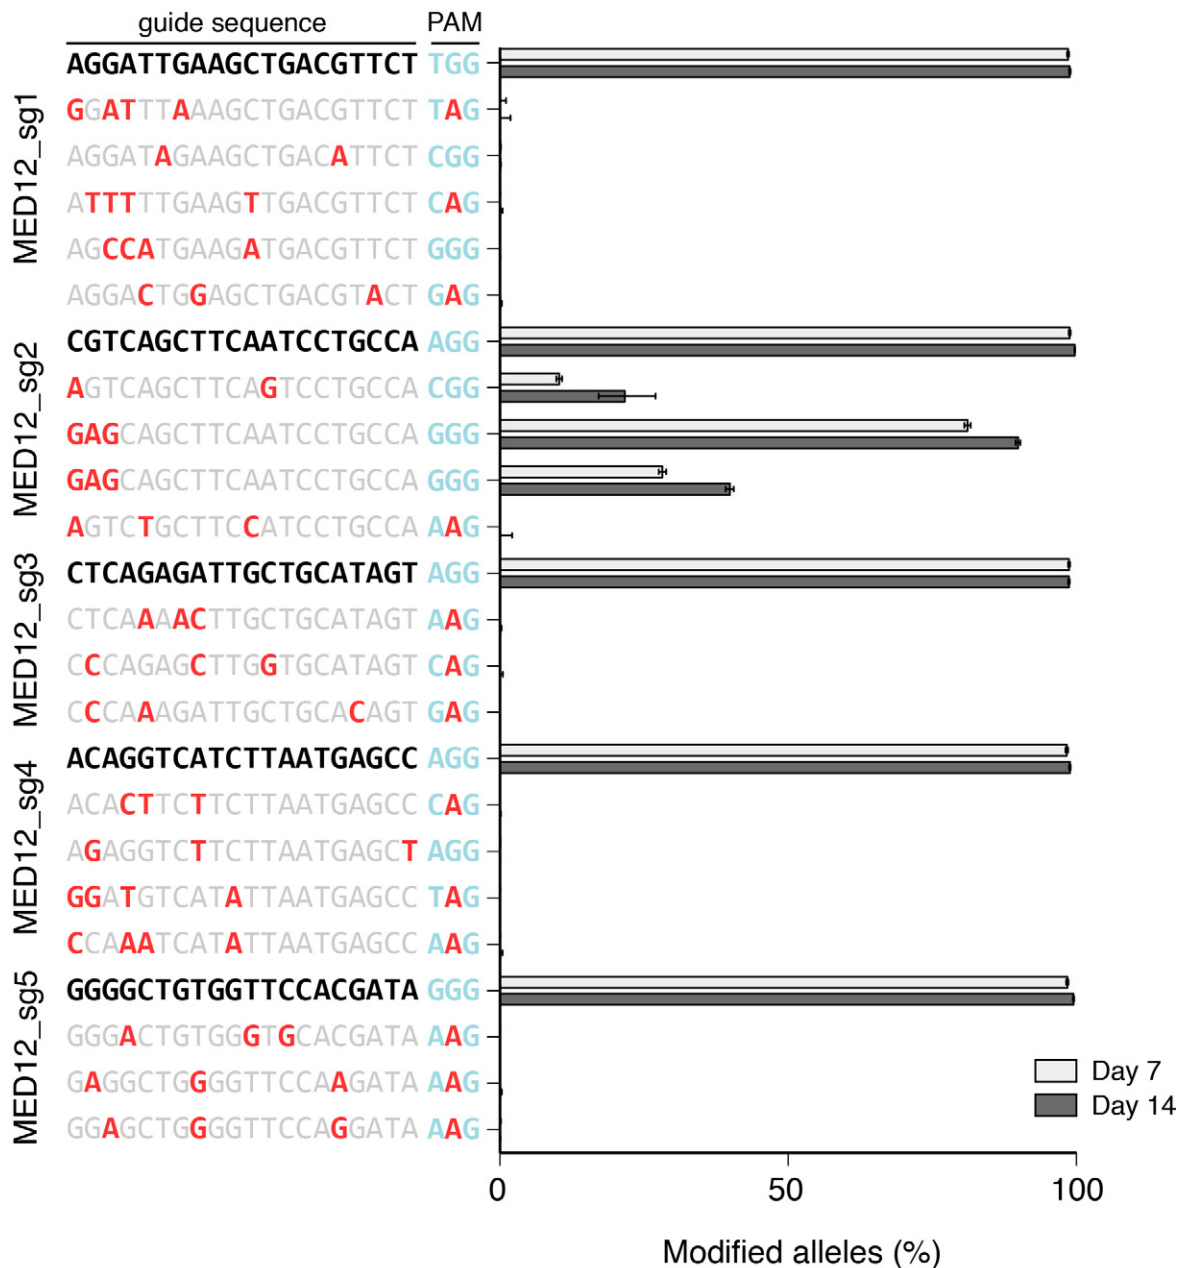

**Fig. S16 | Measurements of on and off target allele modification frequencies for three sgRNAs targeting *MED12***

Each row represents a genomic locus consisting of a 20bp sgRNA site (in black or gray letters) followed by a 3bp PAM sequence (in light blue letters). Sequences in bold black letters indicate the genomic sequences that the GeCKO library sgRNAs were designed to target. Below each bold line are 3 to 5 predicted potential off target genomic sequences identified using the CRISPR design tool (<http://tools.genome-engineering.org>) (37). Red nucleotides highlight the differences



in these off target sequences from the on target site. Each locus (on and off target) was PCR amplified and then deep sequenced. Bars show the percentage of modified alleles 7 and 14 days post transduction with error bars representing Wilson intervals (as in (35)).

## SUPPLEMENTARY SEQUENCES

*LentiCRISPR* (pXPR\_001 available through Addgene) *plasmid map & annotation key*

|               |                                                                                                    |
|---------------|----------------------------------------------------------------------------------------------------|
| <b>Pink</b>   | BsmBI TypeIIIs sites for cloning in 20bp sgRNA guide sequence after removing 1.8kb spacer sequence |
| <b>Green</b>  | +85 chRNA sequence for sgRNA                                                                       |
| <b>Gray</b>   | EFS promoter sequence                                                                              |
| <b>Yellow</b> | Human codon-optimized SpCas9 coding sequence                                                       |
| <b>Red</b>    | P2A bicistronic linker/self-cleaving peptide                                                       |
| <b>Blue</b>   | Puromycin resistance coding sequence                                                               |

Online plasmid map is available here: <http://bit.ly/pLentiCRISPR>

```
>lentiCRISPR (pXPR_001)
TTAATGTAGTCTTATGCAATACTCTTGTAGTCTTGCAACATGGTAACGATGAGTTAGCAACATG
CCTTACAAGGAGAGAAAAAGCACCGTGCATGCCGATTGGTGGAAAGTAAGGTGGTACGATCGTGC
CTTATTAGGAAGGCAACAGACGGGTCTGACATGGATTGGACGAACCACTGAATTGCCGCATTGC
AGAGATATTGTATTTAAGTGCC TAGCTCGATACATAAACGGGTCTCTCTGGTTAGACCAGATCT
GAGCCTGGGAGCTCTCTGGCTAACTAGGGAACCCACTGCTTAAGCCTCAATAAAGCTTGCCTTG
AGTGCTTCAAGTAGTGTGTGCCGTCTGTTGTGTGACTCTGGTAACTAGAGATCCCTCAGACCC
TTTTAGTCAGTGTGGAAAATCTCTAGCAGTGGCGCCCGAACAGGGACTTGAAAGCGAAAGGGAA
ACCAGAGGAGCTCTCTCGACGCAGGACTCGGCTTGCTGAAGCGCGCACGGCAAGAGGGCGAGGGG
CGGCGACTGGTGAGTACGCCAAAAATTTTGACTAGCGGAGGCTAGAAGGAGAGAGATGGGTGCG
AGAGCGTCAGTATTAAGCGGGGGAGAATTAGATCGCGATGGGAAAAAATTCGGTTAAGGCCAGG
GGGAAAGAAAAAATATAAATTTAAACATATAGTATGGGCAAGCAGGGAGCTAGAACGATTCGCA
GTTAATCCTGGCCTGTTAGAAACATCAGAAGGCTGTAGACAAATACTGGGACAGCTACAACCAT
CCCTTCAGACAGGATCAGAAGAACTTAGATCATTATATAATACAGTAGCAACCCTCTATTGTGT
GCATCAAAGGATAGAGATAAAAGACACCAAGGAAGCTTTAGACAAGATAGAGGAAGAGCAAAAC
AAAAGTAAGACCACCGCACAGCAAGCGGCCGCTGATCTTCAGACCTGGAGGAGGAGATATGAGG
GACAATTGGAGAAGTGAATTATATAAATATAAAGTAGTAAAAATTGAACCATTAGGAGTAGCAC
CCACCAAGGCAAAGAGAAGAGTGGTGCAGAGAGAAAAAAGAGCAGTGGGAATAGGAGCTTTGTT
CCTTGGGTTCTTGGGAGCAGCAGGAAGCACTATGGGCGCAGCGTCAATGACGCTGACGGTACAG
GCCAGACAATTATTGTCTGGTATAGTGCAGCAGCAGAACAATTTGCTGAGGGCTATTGAGGCGC
AACAGCATCTGTTGCAACTCACAGTCTGGGGCATCAAGCAGCTCCAGGCAAGAATCCTGGCTGT
GGAAAGATACCTAAAGGATCAACAGCTCCTGGGGATTTGGGGTTGCTCTGGAAAACCTATTTGC
ACCACTGCTGTGCCTTGAATGCTAGTTGGAGTAATAAATCTCTGGAACAGATTTGGAATCACA
CGACCTGGATGGAGTGGGACAGAGAAATTAACAATTACACAAGCTTAATACACTCCTTAATTGA
AGAATCGCAAACCAGCAAGAAAAGAATGAACAAGAATTATTGGAATTAGATAAATGGGCAAGT
TTGTGGAATTGGTTTAAACATAACAAATTGGCTGTGGTATATAAAATTATTCATAATGATAGTAG
GAGGCTTGGTAGGTTTAAAGAATAGTTTTTGGCTGTACTTTCTATAGTGAATAGAGTTAGGCAGGG
ATATTCACCATTATCGTTTTAGACCCACCTCCCAACCCCGAGGGGACCCAGAGAGGGCCTATTT
CCATGATTCTTCATATTTGCATATACGATACAAGGCTGTTAGAGAGATAAATTAGAATTAATT
TGACTGTAAACACAAAGATATTAGTACAAAATACGTGACGTAGAAAGTAATAATTTCTTGGGTA
GTTTGCAGTTTTTAAATTATGTTTTAAATGGACTATCATATGCTTACCGTAACTTGAAAGTAT
TTCGATTTCTTGGCTTTATATATCTTGTGGAAAGGACGAAACACCGGAGACGGTTGTAAATGAG
CACACAAAATACACATGCTAAAATATTATATTCTATGACCTTTATAAAATCAACCAAATCTTC
```

TTTTTAATAACTTTAGTATCAATAATTAGAATTTTTATGTTCTTTTTGCAAACCTTTAATAAAA  
AATGAGCAAATAAAAAACGCTAGTTTTAGTAACTCGCGTTGTTTTCTTCACCTTTAATAATA  
GCTACTCCACCCTTGTTCCTAAGCGGTCAGCTCCTGCTTCAATCATTTTTTGAGCATCTTCAA  
ATGTTCTAACTCCACCAGCTGCTTTAACTAAAGCATTGTCTTTAACAACCTGACTTCATTAGTTT  
AACATCTTCAAATGTTGCACCTGATTTTGAAAATCCTGTTGATGTTTTAACAATTTCTAATCCA  
GCTTCAACAGCTATTTCAAGCTTTTCATGATTTCTTCTTTTTGTTAATAAACAATTTCCATAA  
TACATTTAACAACATGTGATCCAGCTGCTTTTTTTACAGCTTTTCATGTCTTCTAAAACCTAATTC  
ATAATTTTTGTCTTTTAATGCACCAATATTTAATACCATATCAATTTCTGTTGCACCATCTTTA  
ATTGCTTCAGAACTTCGAATGCTTTTTGTAGCTGTTGTGCATGCACCTAGAGGAAAACCTACAA  
CATTGTATTCTACATTTGTGCCTTTTAATAATTTCTTACAATAGCTTGTTCATATGAATT  
AACACAACTGTTGCAAATCAAATTCATTCATCACATAATTGTTAATTTTCAGCTTTTC  
GTAGCATCTTGTTTAATAATGTGTGATCTATATATTTGTTTAGTTTCATTTTTCTCCTATAT  
ATTCATTTTTAATTTAATTTCTTTAATAATTTCTGCTACTTTAACTTTAGCGTTTTGAACAGAT  
TCACCAACACCTATAAAATAAATTTTTAGTTTAGGTTCCAGTTCCACTGGGCGAACAGCAAATC  
ATGACTTATCTTCTAAATAAAATTTTAGTAAGTCTTGTCTGGCATATTATACATTCCATCGAT  
GTAGTCTTCAACATTAACAACCTTTAAGTCCAGCAATTTGAGTTAAGGGTGTGCTCTCAATGAT  
TTCATTAATGGTTCAATTTTTAATTTCTTTCTTCTGGTTTAAATTTCAAGTTTAAAGTGAAAG  
TGTAATATGCACCCATTTCTTTAATAAATCTTCTAAATAGTCTACTAATGTTTTATTTGT  
TTTATAAAATCAAGCAGCCTCTGCTATTAATATAGAAGCTTGTATTCCATCTTTATCTCTAGCT  
GAGTCATCAATTACATATCCATAACTTTCTTATAAGCAAAAACAAAATTTAATCCGTTATCTT  
CTTCTTTAGCAATTTCTCTACCCATTCATTTAAATCCAGTTAAAGTTTTTACAATATTAACCTC  
ATATTTTTCATGAGCGATTCTATCACCCAAATCACTTGTACAAAACCTGAATATAGAGCCGGA  
TTTTTTGGAATGCTATTTAAGCGTTTTTAGATTTGATAATTTTCAATCAATTTAAATTTGGTCTG  
TTTGATTTCCATCTAATCTTACAAAATGACCATCATGTTTTATTGCCATTCAAATCTGTCAGC  
ATCTGGGTCATTATAATAATAATATCTGCATCATGTTAATACCATATTCAAGCGGTATTTTT  
CATGCAGGATCAAATTTGGATTTGGATTTACAACATTTTTAAATGTTTCATCTTCAAATGCAT  
GCTCTTCAACCTCAATAACGTTATATCCTGATTCACGTAATATTTTTGGGGTAAATTTAGTTCC  
TGTTCCATTAACCTGCGCTAAAAATAATTTTTAAATCTTTTTTAGCTTCTTGCTCTTTTTGTAC  
GTCTCTGTTTTAGAGCTAGAAAAGCAAGTTAAAATAAGGCTAGTCCGTTATCAACTTGAAAA  
GTGGCACCGAGTCCGGTCTTTTTGAATTTCTAGATCTTGAGACAAATGGCAGTATTCATCCACA  
ATTTTAAAGAAAAGGGGGGATTGGGGGGTACAGTGCAGGGGAAAGAATAGTAGACATAATAGC  
AACAGACATACAAATAAAGAAATTACAAAACAAATTACAAAATTTCAAATTTTCGGGTTTAT  
TACAGGGACAGCAGAGATCCACTTTGGCGCCGGCTCGAGTGGCTCCGGTGCCCGTCAGTGGGCA  
GAGCGCACATCGCCACAGTCCCCGAGAAGTTGGGGGAGGGGTCCGGCAATTGAACCGGTGCCT  
AGAGAAGGTGGCGGGGTAACCTGGGAAAGTGATGTCGTGACTGGCTCCGCCTTTTTCCCGA  
GGGTGGGGGAGAACCGTATATAAGTGCAGTAGTCGCCGTGAACGTTCTTTTTCGCAACGGGTTT  
GCCGCCAGAACACAGGTGTCGTGACGCGGGATCCGCCACCATGGATTACAAAGACGATGACGAT  
AAGATGGCCCCAAGAAGAAGCGGAAGGTCCGTATCCACGGAGTCCCAGCAGCCGACAAGAAGT  
ACAGCATCGGCCCTGGACATCGGCACCAACTCTGTGGGCTGGGCCGTGATCACCGACGAGTACAA  
GGTGCCAGCAAGAAATTTCAAGGTGCTGGGCAACACCGACCGGCACAGCATCAAGAAGAACCCTG  
ATCGGAGCCCTGCTGTTTCGACAGCGGCGAAACAGCCGAGGCCACCCGGCTGAAGAGAACCGCCA  
GAAGAAGATACACCAGACGGAAGAACCAGATCTGCTATCTGCAAGAGATCTTACGCAACGAGAT  
GGCCAAGGTGGACGACAGCTTCTTCCACAGACTGGAAGAGTCCTTCTGGTGGAAGAGGATAAG  
AAGCACGAGCGGCACCCATCTTCGGCAACATCGTGGACGAGGTGGCCTACCACGAGAAGTACC  
CCACCATCTACCACCTGAGAAAGAACTGGTGGACAGCACCGACAAGGCCGACCTGCGGCTGAT  
CTATCTGGCCCTGGCCACATGATCAAGTTCCGGGGCCACTTCTGATCGAGGGCGACCTGAAC  
CCCACAACAGCGACGTGGACAAGCTGTTTCATCCAGCTGGTGCAGACCTACAACCAGCTGTTTCG

AGGAAAACCCCATCAACGCCAGCGGGCTGGACGCCAAGGCCATCCTGTCTGCCAGACTGAGCAA  
GAGCAGACGGCTGGAAAATCTGATCGCCAGCTGCCCGGCGAGAAGAAGAATGGCCTGTTCCGC  
AACCTGATTGCCCTGAGCCTGGGCCTGACCCCAACTTCAAGAGCAACTTCGACCTGGCCGAGG  
ATGCCAAACTGCAGCTGAGCAAGGACACCTACGACGACGACCTGGACAACCTGCTGGCCAGAT  
CGGCGACCAGTACGCCGACCTGTTTCTGGCCGCCAAGAACCTGTCCGACGCCATCCTGCTGAGC  
GACATCCTGAGAGTGAACACCGAGATCACCAAGGCCCCCTGAGCGCCTCTATGATCAAGAGAT  
ACGACGAGCACCACCAGGACCTGACCCTGCTGAAAGCTCTCGTGCGGCAGCAGCTGCCTGAGAA  
GTACAAAGAGATTTTCTTCGACCAGAGCAAGAACGGCTACGCCGGCTACATTGACGGCGGAGCC  
AGCCAGGAAGAGTTCTACAAGTTCATCAAGCCATCCTGGAAAAGATGGACGGCACCCGAGGAAC  
TGCTCGTGAAGCTGAACAGAGAGGACCTGCTGCGGAAGCAGCGGACCTTCGACAACGGCAGCAT  
CCCCACCAGATCCACCTGGGAGAGCTGCACGCCATTCTGCGGGCGGCAGGAAGATTTTTACCCA  
TTCCTGAAGGACAACCGGGAAAAGATCGAGAAGATCCTGACCTTCCGCATCCCCTACTACGTGG  
GCCCTCTGGCCAGGGGAAACAGCAGATTCGCCCTGGATGACCAGAAAAGAGCGAGGAAACCATCAC  
CCCCTGGAACCTTCGAGGAAGTGGTGGACAAGGGCGCTTCCGCCAGAGCTTCATCGAGCGGATG  
ACCAACTTCGATAAGAACCTGCCAACGAGAAGGTGCTGCCAACGACAGCCTGCTGTACGAGT  
ACTTCACCGTGTATAACGAGCTGACCAAAGTGAATACGTGACCAGGGAATGAGAAAGCCCGC  
CTTCTGAGCGGCGAGCAGAAAAAGGCCATCGTGGACCTGCTGTTCAAGACCAACCGGAAAGTG  
ACCGTGAAGCAGCTGAAAGAGGACTACTTCAAGAAAATCGAGTGCTTCGACTCCGTGGAATCT  
CCGGCGTGGAAAGATCGGTTCAACGCCTCCCTGGGCACATACCACGATCTGCTGAAAATTATCAA  
GGACAAGGACTTCCTGGACAATGAGGAAAACGAGGACATTCTGGAAGATATCGTGCTGACCCTG  
ACACTGTTTGAGGACAGAGAGATGATCGAGGAACGGCTGAAAACCTATGCCACCTGTTCCGACG  
ACAAAGTGATGAAGCAGCTGAAGCGGCGGAGATACACCGGCTGGGGCAGGCTGAGCCGGAAGCT  
GATCAACGGCATCCGGGACAAGCAGTCCGGCAAGACAATCCTGGATTTCTGAAGTCCGACGGC  
TTCGCCAACAGAACTTCATGCAGCTGATCCACGACGACAGCCTGACCTTTAAAGAGGACATCC  
AGAAAGCCCAGGTGTCCGGCCAGGGCGATAGCCTGCACGAGCACATTGCCAATCTGGCCGGCAG  
CCCCGCCATTAAGAAGGGCATCCTGCAGACAGTGAAGGTGGTGGACGAGCTCGTGAAAGTGATG  
GGCCGGCACAAGCCCAGAAACATCGTGATCGAAATGGCCAGAGAGAACCAGACCACCCAGAAGG  
GACAGAAGAACAGCCGCGAGAGAATGAAGCGGATCGAAGAGGGCATCAAAGAGCTGGGCAGCCA  
GATCCTGAAAGAACACCCCGTGGAAAACACCCAGCTGCAGAACGAGAAGCTGTACCTGTACTAC  
CTGCAGAATGGGCGGGATATGTACGTGGACCAGGAACGGACATCAACCGGCTGTCCGACTACG  
ATGTGGACCATATCGTGCCTCAGAGCTTCTGAAGGACGACTCCATCGACAACAAGGTGCTGAC  
CAGAAGCGACAAGAACCAGGGCAAGAGCGACAACGTGCCCTCCGAAGAGGTCTGTAAGAAGATG  
AAGAATACTGGCGGCAGCTGCTGAACGCCAAGCTGATTACCCAGAGAAAGTTCGACAATCTGA  
CCAAGGCCGAGAGAGGGCGCCTGAGCGAACTGGATAAAGCCGGCTTCATCAAGAGACAGCTGGT  
GGAAACCCGGCAGATCACAAAGCACGTGGCACAGATCCTGGACTCCCAGGATGAACACTAAGTAC  
GACGAGAATGACAAGCTGATCCGGGAAGTGAAGTGATCACCTGAAGTCCAAGCTGGTGTCCG  
ATTTCCGGAAGGATTTCCAGTTTTACAAAGTGCGCGAGATCAACAACCTACCACCACGCCACGA  
CGCCTACCTGAACGCCGTCTGTGGGAACCGCCCTGATCAAAAAGTACCCTAAGCTGGAAAGCGAG  
TTCGTGTACGGCGACTACAAGGTGTACGACGTGCGGAAGATGATCGCCAAGAGCGAGCAGGAAA  
TCGGCAAGGCTACCGCCAAGTACTTCTTCTACAGCAACATCATGAACTTTTTCAAGACCGAGAT  
TACCCTGGCCAACGGCGAGATCCGGAAGCGGCCTCTGATCGAGACAAACGGCGAAACCGGGGAG  
ATCGTGTGGGATAAGGGCCGGGATTTTGCCACCGTGCAGAAAGTGCTGAGCATGCCCAAGTGA  
ATATCGTGAAAAAGACCGAGGTGCAGACAGGCGGCTTCAGCAAAGAGTCTATCCTGCCAAGAG  
GAACAGCGATAAGCTGATCGCCAGAAAAGGACTGGGACCCTAAGAAGTACGGCGGCTTCGAC  
AGCCCCACCGTGGCCTATTCTGTGCTGGTGGTGGCCAAAGTGGAAGGGCAAGTCCAAGAAAC  
TGAAGAGTGTGAAAGAGCTGCTGGGGATCACCATCATGGAAAAGCAGCTTCGAGAAGAATCC  
CATCGACTTCTGGAAGCCAAGGGCTACAAGAAGTGAAAAGGACCTGATCATCAAGCTGCCT

AAGTACTCCCTGTTTCGAGCTGGAAAACGGCCGGAAGAGAATGCTGGCCTCTGCCGGCGAACTGC  
AGAAGGGAAACGAACTGGCCCTGCCCTCCAAATATGTGAACTTCTGTACCTGGCCAGCCACTA  
TGAGAAGCTGAAGGGCTCCCCGAGGATAATGAGCAGAAACAGCTGTTTGTGGAACAGCACAAAG  
CACTACCTGGACGAGATCATCGAGCAGATCAGCGAGTTCTCCAAGAGAGTGATCCTGGCCGACG  
CTAATCTGGACAAAAGTGCTGTCCGCCTACAACAAGCACCGGGATAAGCCCATCAGAGAGCAGGC  
CGAGAATATCATCCACCTGTTTACCCTGACCAATCTGGGAGCCCCCTGCCGCTTCAAGTACTTT  
GACACCACCATCGACCGGAAGAGGTACACCAGCACCAAAGAGGTGCTGGACGCCACCCTGATCC  
ACCAGAGCATCACCGGCCTGTACGAGACACGGATCGACCTGTCTCAGCTGGGAGGGCACAAGCG  
TCCTGCTGCTACTAAGAAAGCTGGTCAAGCTAAGAAAAAGAAAGCTAGC**GGCAGCGGCGCCACC**  
**AACTTCAGCCTGCTGAAGCAGGCGGGCAGCTGGAGGAGAACC****CGGCC**ATGACCGAGTACA  
AGCCACGGTGCGCCTCGCCACCCGCGACGACGTCCCCAGGGCCGTACGCACCCTCGCCGCCGC  
GTTCCGCGACTACCCCGCCACGCGCCACACCGTCGATCCGGACCGCCACATCGAGCGGGTCACC  
GAGCTGCAAGAACTCTTCTCACGCGCGTCGGGCTCGACATCGGCAAGGTGTGGGTGCGGGACG  
ACGGCGCGGCCGTGGCGGTCTGGACCACGCCGGAGAGCGTCAAGCGGGGGCGGTGTTCCGCGA  
GATCGGCCCGCGCATGGCCGAGTTGAGCGGTTCCCGGCTGGCCGCGCAGCAACAGATGGAAGGC  
CTCCTGGCGCCGACCGGCCAAGGAGCCCGCGTGGTTCCTGGCCACCCTCGGAGTCTCGCCCG  
ACCACCAGGGCAAGGGTCTGGGCAGCGCCGTCGTGCTCCCCGGAGTGGAGGCGGCCGAGCGCGC  
CGGGGTGCCCGCCTTCTGGAGACCTCCGCGCCCCGCAACCTCCCCTTCTACGAGCGGCTCGGC  
TTCACCGTCACCGCCGACGTCGAGGTGCCCGAAGGACCGCGCACCTGGTGCATGACCCGCAAGC  
CCGGTGCCTGAACGCGTTAAGTCGACAATCAACCTCTGGATTACAAAATTTGTGAAAGATTGAC  
TGGTATTCTTAACTATGTTGCTCCTTTTACGCTATGTGGATACGCTGCTTTAATGCCTTTGTAT  
CATGCTATTGCTTCCCGTATGGCTTTCATTTTCTCCTCCTTGTATAAATCCTGGTTGCTGTCTC  
TTTATGAGGAGTTGTGGCCCGTTGTCAGGCAACGTGGCGTGGTGTGCACTGTGTTTGTGACGC  
AACCCCACTGGTTGGGGCATTGCCACCACCTGTCAGCTCCTTTCCGGGACTTTTCGTTTTCCCC  
CTCCCTATTGCCACGGCGGAATCATCGCCGCTGCCCTTGCCCGCTGCTGGACAGGGGCTCGGC  
TGTTGGGCACTGACAATCCGTGGTGTGTCGGGAAATCATCGTCTTTCCTTGGCTGCTCGC  
CTGTGTTGCCACCTGGATTCTGCGCGGGACGTCCTTCTGCTACGTCCCTTCGGCCCTCAATCCA  
GCGGACCTTCTTCCCGCGGCCCTGCTGCCGGCTCTGCGGCCTTTCGCGTCTTCGCCTTCGCC  
CTCAGACGAGTCGGATCTCCCTTTGGGCCGCTCCCCGCGTCGACTTTAAGACCAATGACTTAC  
AAGGCAGCTGTAGATCTTAGCCACTTTTTAAAAGAAAAGGGGGGACTGGAAGGGCTAATTCACT  
CCAACGAAGACAAGATCTGCTTTTTGCTTGTACTGGGTCTCTCTGGTTAGACCAGATCTGAGC  
CTGGGAGCTCTCTGGCTAACTAGGGAACCCACTGCTTAAGCCTCAATAAAGCTTGCCTTGAGTG  
CTTCAAGTAGTGTGTGCCCGTCTGTTGTGTGACTCTGGTAACTAGAGATCCCTCAGACCCTTTT  
AGTCAGTGTGAAAATCTCTAGCAGTACGTATAGTAGTTCATGTCATCTTATTATTCAGTATTT  
ATAACTTGCAAAGAAATGAATATCAGAGAGTGAGAGGAACTTGTTTATTGCAGCTTATAATGGT  
TACAAATAAAGCAATAGCATCACAAATTTACAAATAAAGCATTTTTTTTTCACTGCATTCTAGTT  
GTGGTTTGTCCAAACTCATCAATGTATCTTATCATGTCTGGCTCTAGCTATCCCGCCCCTAACT  
CCGCCATCCCGCCCCTAACTCCGCCAGTTCGCCCATCTCCGCCCATGGCTGACTAATTT  
TTTTTATTTATGCAGAGGCCGAGGCCGCTCGGCCTCTGAGCTATTCCAGAAGTAGTGAGGAGG  
CTTTTTTGGAGGCCTAGGGACGTACCCAATTCGCCCTATAGTGAGTCGTATTACGCGCGCTCAC  
TGGCCGTCGTTTTTACAACGTCGTGACTGGGAAAACCCGGCGTTACCCAATTAATCGCCTTGC  
AGCACATCCCCCTTCGCCAGCTGGCGTAATAGCGAAGAGGCCCGCACCGATCGCCCTTCCCAA  
CAGTTGCGCAGCCTGAATGGCGAATGGGACGCGCCCTGTAGCGGCGCATTAAAGCGCGGCGGGTG  
TGGTGGTTACGCGCAGCGTGACCGCTACACTTGCCAGCGCCCTAGCGCCCGCTCCTTTTCGCTTT  
CTTCCCTTCTTCTCGCCACGTTTCGCCGGCTTTCCCCGTCAAGCTCTAAATCGGGGGCTCCCT  
TTAGGGTTCCGATTTAGTGCTTTACGGCACCTCGACCCCAAAAACCTTGATTAGGGTGATGGTT  
CACGTAGTGGGCCATCGCCCTGATAGACGGTTTTTCGCCCTTTGACGTTGGAGTCCACGTTCTT

TAATAGTGGACTCTTGTTCCAAACTGGAACAACACTCAACCCTATCTCGGTCTATTCTTTTGAT  
TTATAAGGGATTTTGCCGATTTTCGGCCTATTGGTTAAAAAATGAGCTGATTTAACAAAAATTTA  
ACGCGAATTTTAACAAAATATTAACGCTTACAATTTAGGTGGCACTTTTTCGGGGAAATGTGCGC  
GGAACCCCTATTTGTTTTATTTTTCTAAATACATTCAAATATGTATCCGCTCATGAGACAATAAC  
CTGATAAATGCTTCAATAATATTGAAAAAGGAAGAGTATGAGTATTCAACATTTCCGTGTGCG  
CCTTATTCCCTTTTTTTCGGGCATTTTGCCTTCTGTTTTTGTCTACCCAGAAACGCTGGTGAAA  
GTAAAAGATGCTGAAGATCAGTTGGGTGCACGAGTGGGTTACATCGAACTGGATCTCAACAGCG  
GTAAGATCCTTGAGAGTTTTTCGCCCCGAAGAACGTTTTTCCAATGATGAGCACTTTTAAAGTTCT  
GCTATGTGGCGCGGTATTATCCCCTATTGACGCCGGGCAAGAGCAACTCGGTGCGCCGATACAC  
TATTCTCAGAATGACTTGGTTGAGTACTACCAGTCACAGAAAAGCATCTTACGGATGGCATGA  
CAGTAAGAGAATTATGCAGTGCTGCCATAACCATGAGTGATAACACTGCGGCCAACTTACTTCT  
GACAACGATCGGAGGACCGAAGGAGCTAACCGCTTTTTTGCACAACATGGGGGATCATGTAAC  
CGCCTTGATCGTTGGGAACCGGAGCTGAATGAAGCCATACCAAACGACGAGCGTGACACCACGA  
TGCCTGTAGCAATGGCAACAACGTTGCGCAAACCTATTAACCTGGCGAACTACTTACTCTAGCTTC  
CCGGCAACAATTAATAGACTGGATGGAGGCGGATAAAGTTGCAGGACCACTTCTGCGCTCGGCC  
CTTCCGGCTGGCTGGTTTTATTGCTGATAAATCTGGAGCCGGTGAGCGTGGGTCTCGCGGTATCA  
TTGCAGCACTGGGGCCAGATGGTAAGCCCTCCCCTATCGTAGTTATCTACACGACGGGGAGTCA  
GGCAACTATGGATGAACGAAATAGACAGATCGCTGAGATAGGTGCCTCACTGATTAAGCATTGG  
TAACTGTCAGACCAAGTTTACTCATATATACTTTAGATTGATTTAAAACCTTCATTTTTTAATTTA  
AAAGGATCTAGGTGAAGATCCTTTTTGATAATCTCATGACCAAATCCCTTAACGTGAGTTTTTC  
GTTCCACTGAGCGTCAGACCCCGTAGAAAAGATCAAAGGATCTTCTTGAGATCCTTTTTTTCTG  
CGCGTAATCTGCTGCTTGCAAACAAAAAACCCACCGCTACCAGCGGTGGTTTTGTTGCCGGATC  
AAGAGCTACCAACTCTTTTTCCGAAGGTAACCTGGCTTCAGCAGAGCGCAGATACCAAATACTGT  
TCTTCTAGTGTAGCCGTAGTTAGGCCACCACTTCAAGAACTCTGTAGCACCGCCTACATACCTC  
GCTCTGCTAATCCTGTTACCAGTGGCTGCTGCCAGTGGCGATAAGTCGTGCTTACCGGGTTGG  
ACTCAAGACGATAGTTACCGGATAAGGCGCAGCGGTCGGGCTGAACGGGGGGTTTCGTGCACACA  
GCCCAGCTTGGAGCGAACGACCTACACCGAACTGAGATACCTACAGCGTGAGCTATGAGAAAGC  
GCCACGCTTCCCGAAGGGAGAAAGGCGGACAGGTATCCGGTAAGCGGCAGGGTCGGAACAGGAG  
AGCGCACGAGGGAGCTTCCAGGGGGAAACGCC TGGTATCTTTATAGTCCTGTGCGGGTTTCGCCA  
CCTCTGACTTGAGCGTCGATTTTTGTGATGCTCGTCAGGGGGCGGAGCCTATGGAAAAACGCC  
AGCAACGCGGCCTTTTTACGGTTCTTGCCCTTTTTGCTGGCCTTTTTGCTCACATGTTCTTTCTG  
CGTTATCCCCTGATTCTGTGGATAACCGTATTACCGCCTTTGAGTGAGCTGATACCGCTCGCCG  
CAGCCGAACGACCGAGCGCAGCGAGTCAGTGAGCGAGGAAGCGGAAGAGCGCCCAATACGCAAA  
CCGCCTCTCCCCGCGGTTGGCCGATTCATTAATGCAGCTGGCACGACAGGTTTCCCGACTGGA  
AAGCGGGCAGTGAGCGCAACGCAATTAATGTGAGTTAGCTCACTCATTAGGCACCCCAGGCTTT  
ACACTTTATGCTTCCGGCTCGTATGTTGTGTGGAATTGTGAGCGGATAACAATTTACACACAGGA  
AACAGCTATGACCATGATTACGCCAAGCGCGCAATTAACCCTCACTAAAGGGAACAAAAGCTGG  
AGCTGCAAGC

Due to its large size, we were unable to upload **Table S1** via the Science Submission website. A PDF version is available online for download:

[http://www.genome-engineering.org/papers/shalem2013/Table\\_S1.xlsx](http://www.genome-engineering.org/papers/shalem2013/Table_S1.xlsx)

**All table captions are below with tables S2 to S6 following after the captions.**

**Table S1 | Database of 64,751 sgRNAs for GeCKO library with HUGO gene IDs, CCDS ID, and off-target (OS) score.**

**Table S2 | Gene Set Enrichment Analysis output for negative selection of essential genes in A375 cells after 14 additional days in culture.** For the analysis, the *ALL Gene Ontology* set was used from the Molecular Signatures Database (MSigDB) with a minimum set size of 50 and max set size of 300.

**Table S3 | Gene Set Enrichment Analysis output for negative selection of essential genes in HUES62 hES cells after 14 additional days in culture.** For the analysis, the *ALL Gene Ontology* set was used from the Molecular Signatures Database (MSigDB) with a minimum set size of 50 and max set size of 300.

**Table S4 | Top 1000 depleted genes for both A375 and HUES62.** Mean depletion for each gene is given as the log<sub>2</sub> ratio of Day 14 vs. Day 3 representation (mean over sgRNAs for the gene).

**Table S5 | Output of the RIGER algorithm for the initial A375 PLX screen comparing PLX (mean of the two replicates at day 14) to vehicle control (mean of the two replicates at day 14).** The weighted sum method was used to convert sgRNAs to genes. Genes are sorted by RIGER rank.

**Table S6 | Output of the RIGER algorithm for the transduction replicate A375 PLX screen comparing PLX (mean of the two replicates at day 14) to vehicle control (mean of the two**

**replicates at day 14).** The weighted sum method was used to convert sgRNAs to genes. Genes are sorted by RIGER rank.

**Table S7 | Comparison of the top 20 hits between the two infection replicate screens by RIGER rank.** The overlap of top hits between the two biological replicates with independent infections demonstrates the consistency of the GeCKO library.

**Table S8 | Comparison of the top 20 hits between the two A375 PLX infection replicate screens by RSA rank.** Redundant siRNA activity (RSA) uses an enrichment cutoff and hypergeometric test to measure the support for a gene using the enrichment of the sgRNAs (or shRNAs) for each gene.

**Table S9 | Cas9-sgRNA array screening constructs used.** Names and targeting sequence for all Cas9-sgRNA constructs used for validation in A375 screen. Cas9-sgRNAs with *names in italics* are contained in the GeCKO library.

**Table S10 | shRNA array screening constructs used.** Names and The RNAi Consortium (TRC) identification numbers for all shRNA constructs used for validation in A375 screen.



**Table S2** | Gene Set Enrichment Analysis output for negative selection of essential genes in A375 cells after 14 additional days in culture. For the analysis, the *ALL Gene Ontology* set was used from the Molecular Signatures Database (MSigDB) with a minimum set size of 50 and max set size of 200.

| NAME                                   | SIZE | ES   | NES  | NOMp  | FDRq     | FWERp | RANK AT MAX |
|----------------------------------------|------|------|------|-------|----------|-------|-------------|
| RNA_PROCESSING                         | 169  | 0.45 | 6.78 | 0     | 0        | 0     | 4613        |
| STRUCTURAL_CONSTITUENT_OF_RIBOSOME     | 76   | 0.63 | 6.48 | 0     | 0        | 0     | 4091        |
| RIBONUCLEOPROTEIN_COMPLEX              | 141  | 0.43 | 6    | 0     | 0        | 0     | 3122        |
| RNA_SPLICING                           | 90   | 0.49 | 5.44 | 0     | 0        | 0     | 3166        |
| RIBONUCLEOPROTEIN_COMPLEX_BIOGENESI    | 82   | 0.45 | 4.78 | 0     | 0        | 0     | 3300        |
| MRNA_PROCESSING_GO_0006397             | 71   | 0.46 | 4.65 | 0     | 0        | 0     | 4504        |
| MRNA_METABOLIC_PROCESS                 | 81   | 0.44 | 4.62 | 0     | 0        | 0     | 5832        |
| TRANSLATION                            | 171  | 0.3  | 4.48 | 0     | 0        | 0     | 4605        |
| SPLICEOSOME                            | 50   | 0.53 | 4.42 | 0     | 0        | 0     | 3122        |
| MITOCHONDRIAL_PART                     | 138  | 0.31 | 4.14 | 0     | 0        | 0     | 5719        |
| NUCLEOLUS                              | 121  | 0.31 | 3.94 | 0     | 0        | 0     | 2989        |
| CHROMOSOME                             | 120  | 0.31 | 3.93 | 0     | 0        | 0     | 2562        |
| CHROMOSOMAL_PART                       | 94   | 0.34 | 3.81 | 0     | 0        | 0     | 4871        |
| ORGANELLE_ENVELOPE                     | 164  | 0.24 | 3.72 | 0     | 0        | 0     | 7637        |
| ENVELOPE                               | 164  | 0.24 | 3.64 | 0     | 0        | 0     | 7637        |
| PROTEIN_RNA_COMPLEX_ASSEMBLY           | 63   | 0.39 | 3.63 | 0     | 0        | 0     | 3011        |
| DNA_REPLICATION                        | 99   | 0.31 | 3.63 | 0     | 0        | 0     | 3726        |
| TRANSLATION_INITIATION_FACTOR_ACTIVIT  | 22   | 0.66 | 3.62 | 0     | 0        | 0     | 2922        |
| RNA_SPLICINGVIA_TRANSESTERIFICATION_RI | 34   | 0.52 | 3.6  | 0     | 0        | 0     | 4504        |
| DNA_DIRECTED_RNA_POLYMERASEII_HOLOE    | 66   | 0.37 | 3.57 | 0     | 0        | 0     | 4378        |
| TRANSLATION_FACTOR_ACTIVITY_NUCLEIC_I  | 35   | 0.49 | 3.54 | 0     | 0        | 0     | 4020        |
| ATP_DEPENDENT_HELICASE_ACTIVITY        | 27   | 0.57 | 3.52 | 0     | 0        | 0     | 3856        |
| RIBOSOME                               | 39   | 0.46 | 3.47 | 0     | 0        | 0     | 4679        |
| TRANSLATION_REGULATOR_ACTIVITY         | 37   | 0.48 | 3.43 | 0     | 0        | 0     | 4020        |
| HELICASE_ACTIVITY                      | 50   | 0.41 | 3.39 | 0     | 0        | 0     | 4253        |
| M_PHASE                                | 113  | 0.27 | 3.38 | 0     | 0        | 0     | 3167        |
| RNA_POLYMERASE_ACTIVITY                | 15   | 0.74 | 3.36 | 0     | 0        | 0     | 3534        |
| MITOSIS                                | 81   | 0.31 | 3.29 | 0     | 0        | 0     | 3167        |
| M_PHASE_OF_MITOTIC_CELL_CYCLE          | 84   | 0.3  | 3.27 | 0     | 0        | 0     | 3167        |
| TRANSCRIPTION_FACTOR_COMPLEX           | 89   | 0.29 | 3.24 | 0     | 0        | 0     | 7446        |
| NUCLEOTIDYLTRANSFERASE_ACTIVITY        | 46   | 0.42 | 3.23 | 0     | 0        | 0     | 5034        |
| MITOCHONDRIAL_ENVELOPE                 | 93   | 0.28 | 3.15 | 0     | 0        | 0     | 7637        |
| BIOPOLYMER_CATABOLIC_PROCESS           | 113  | 0.25 | 3.15 | 0     | 0        | 0     | 8133        |
| MICROTUBULE_CYTOSKELETON               | 148  | 0.22 | 3.14 | 0     | 0        | 0     | 5149        |
| ATP_DEPENDENT_RNA_HELICASE_ACTIVITY    | 17   | 0.63 | 3.13 | 0     | 0        | 0     | 3599        |
| MITOCHONDRIAL_MATRIX                   | 46   | 0.38 | 3.13 | 0     | 0        | 0     | 4866        |
| MITOCHONDRIAL_MEMBRANE                 | 82   | 0.29 | 3.13 | 0     | 0        | 0     | 5507        |
| RRNA_METABOLIC_PROCESS                 | 16   | 0.64 | 3.12 | 0     | 0        | 0     | 3132        |
| MITOCHONDRIAL_INNER_MEMBRANE           | 64   | 0.32 | 3.09 | 0     | 0        | 0     | 5478        |
| CELL_CYCLE_PROCESS                     | 191  | 0.19 | 3.09 | 0     | 0        | 0     | 5108        |
| MITOCHONDRIAL_LUMEN                    | 46   | 0.38 | 3.05 | 0     | 0        | 0     | 4866        |
| MITOCHONDRIAL_MEMBRANE_PART            | 50   | 0.36 | 3.04 | 0     | 0        | 0     | 6911        |
| MACROMOLECULE_CATABOLIC_PROCESS        | 131  | 0.22 | 3.01 | 0     | 0        | 0     | 4410        |
| ORGANELLE_INNER_MEMBRANE               | 72   | 0.3  | 3    | 0     | 0        | 0     | 7637        |
| RNA_DEPENDENT_ATPASE_ACTIVITY          | 18   | 0.58 | 2.98 | 0     | 0        | 0     | 3599        |
| CHROMOSOME_ORGANIZATION_AND_BIOGI      | 124  | 0.23 | 2.97 | 0     | 0        | 0     | 7906        |
| SMALL_NUCLEAR_RIBONUCLEOPROTEIN_COI    | 22   | 0.53 | 2.96 | 0     | 0        | 0     | 2790        |
| RRNA_PROCESSING                        | 15   | 0.63 | 2.92 | 0     | 0        | 0     | 3132        |
| SPINDLE                                | 37   | 0.4  | 2.9  | 0     | 2.11E-05 | 0.001 | 3082        |
| NEGATIVE_REGULATION_OF_DNA_METABOL     | 18   | 0.56 | 2.89 | 0     | 2.07E-05 | 0.001 | 3927        |
| NUCLEOLAR_PART                         | 17   | 0.59 | 2.89 | 0     | 2.03E-05 | 0.001 | 5289        |
| DNA_REPAIR                             | 122  | 0.23 | 2.88 | 0     | 1.99E-05 | 0.001 | 8379        |
| RIBOSOMAL_SUBUNIT                      | 20   | 0.53 | 2.88 | 0     | 1.95E-05 | 0.001 | 7583        |
| RIBOSOME_BIOGENESIS_AND_ASSEMBLY       | 17   | 0.59 | 2.88 | 0     | 1.92E-05 | 0.001 | 3132        |
| CELLULAR_MACROMOLECULE_CATABOLIC_P     | 100  | 0.24 | 2.87 | 0     | 1.88E-05 | 0.001 | 4287        |
| CELLULAR_PROTEIN_CATABOLIC_PROCESS     | 57   | 0.33 | 2.87 | 0     | 1.85E-05 | 0.001 | 3646        |
| RESPONSE_TO_DNA_DAMAGE_STIMULUS        | 158  | 0.2  | 2.87 | 0     | 1.81E-05 | 0.001 | 8379        |
| RNA_HELICASE_ACTIVITY                  | 24   | 0.47 | 2.83 | 0     | 8.76E-05 | 0.005 | 4253        |
| PROTEIN_CATABOLIC_PROCESS              | 67   | 0.3  | 2.82 | 0.002 | 8.61E-05 | 0.005 | 8133        |
| CELL_CYCLE_PHASE                       | 169  | 0.19 | 2.8  | 0     | 1.02E-04 | 0.006 | 6715        |
| TRANSLATIONAL_INITIATION               | 36   | 0.4  | 2.8  | 0     | 1.18E-04 | 0.007 | 1821        |
| SPINDLE_POLE                           | 18   | 0.55 | 2.78 | 0     | 1.16E-04 | 0.007 | 3061        |
| ENDONUCLEASE_ACTIVITY                  | 25   | 0.45 | 2.75 | 0     | 1.30E-04 | 0.008 | 4802        |
| RESPONSE_TO_ENDOGENOUS_STIMULUS        | 194  | 0.17 | 2.73 | 0     | 1.77E-04 | 0.011 | 9201        |
| MITOCHONDRIAL_RIBOSOME                 | 22   | 0.49 | 2.71 | 0     | 2.21E-04 | 0.014 | 7583        |
| REPLICATION_FORK                       | 17   | 0.54 | 2.71 | 0     | 2.18E-04 | 0.014 | 1946        |

|                                       |     |      |      |       |           |       |       |
|---------------------------------------|-----|------|------|-------|-----------|-------|-------|
| DNA_DEPENDENT_DNA_REPLICATION         | 53  | 0.31 | 2.71 | 0     | 2.15E-04  | 0.014 | 3927  |
| NUCLEAR_DNA_DIRECTED_RNA_POLYMERAS    | 17  | 0.53 | 2.69 | 0     | 2.72E-04  | 0.018 | 4181  |
| MITOTIC_CELL_CYCLE                    | 152 | 0.19 | 2.69 | 0     | 2.69E-04  | 0.018 | 5712  |
| DNA_DIRECTED_RNA_POLYMERASE_COMPLE    | 17  | 0.53 | 2.69 | 0     | 2.79E-04  | 0.019 | 4181  |
| ORGANELLAR_RIBOSOME                   | 22  | 0.49 | 2.69 | 0     | 2.75E-04  | 0.019 | 7583  |
| ATPASE_ACTIVITY                       | 112 | 0.22 | 2.68 | 0     | 3.15E-04  | 0.022 | 8238  |
| KINETOCHORE                           | 24  | 0.45 | 2.67 | 0.002 | 3.53E-04  | 0.024 | 3167  |
| MICROTUBULE_ORGANIZING_CENTER         | 65  | 0.28 | 2.65 | 0     | 3.63E-04  | 0.025 | 5750  |
| CELLULAR_RESPIRATION                  | 19  | 0.49 | 2.64 | 0     | 3.58E-04  | 0.025 | 5452  |
| GENERAL_RNA_POLYMERASE_II_TRANSCRIPT  | 32  | 0.39 | 2.64 | 0     | 3.82E-04  | 0.027 | 4282  |
| GOLGI_VESICLE_TRANSPORT               | 45  | 0.33 | 2.63 | 0     | 3.91E-04  | 0.028 | 3262  |
| TRANSCRIPTION_INITIATION              | 35  | 0.37 | 2.63 | 0     | 3.86E-04  | 0.028 | 8749  |
| RNA_POLYMERASE_COMPLEX                | 17  | 0.53 | 2.62 | 0     | 3.94E-04  | 0.029 | 4181  |
| DOUBLE_STRAND_BREAK_REPAIR            | 23  | 0.45 | 2.61 | 0     | 4.02E-04  | 0.03  | 5933  |
| CHROMOSOMEPERICENTRIC_REGION          | 30  | 0.4  | 2.61 | 0     | 3.97E-04  | 0.03  | 1862  |
| NUCLEAR_PORE                          | 31  | 0.4  | 2.58 | 0     | 4.80E-04  | 0.037 | 6200  |
| TRANSCRIPTION_INITIATION_FROM_RNA_PC  | 29  | 0.4  | 2.57 | 0     | 5.37E-04  | 0.042 | 8296  |
| ATPASE_ACTIVITY_COUPLED               | 93  | 0.23 | 2.56 | 0     | 6.43E-04  | 0.051 | 6313  |
| PROTEIN_DNA_COMPLEX_ASSEMBLY          | 48  | 0.31 | 2.56 | 0     | 6.35E-04  | 0.051 | 8352  |
| REGULATION_OF_DNA_METABOLIC_PROCES    | 45  | 0.32 | 2.54 | 0     | 6.89E-04  | 0.056 | 3927  |
| NUCLEAR_MEMBRANE_PART                 | 42  | 0.33 | 2.53 | 0     | 7.42E-04  | 0.061 | 7889  |
| TRANSCRIPTION_FROM_RNA_POLYMERASE_    | 19  | 0.49 | 2.52 | 0     | 7.80E-04  | 0.065 | 5433  |
| CONDENSED_CHROMOSOME                  | 33  | 0.37 | 2.5  | 0     | 8.85E-04  | 0.074 | 2562  |
| DNA_INTEGRITY_CHECKPOINT              | 23  | 0.44 | 2.5  | 0     | 8.86E-04  | 0.075 | 3927  |
| NUCLEASE_ACTIVITY                     | 55  | 0.28 | 2.49 | 0     | 9.23E-04  | 0.079 | 4802  |
| PROTEASOME_COMPLEX                    | 23  | 0.43 | 2.47 | 0     | 0.0010595 | 0.09  | 3950  |
| CELL_CYCLE_CHECKPOINT_GO_0000075      | 47  | 0.3  | 2.45 | 0     | 0.0011911 | 0.101 | 6812  |
| SPLICEOSOME_ASSEMBLY                  | 21  | 0.44 | 2.44 | 0     | 0.0012657 | 0.109 | 5832  |
| PROTEIN_FOLDING                       | 56  | 0.27 | 2.42 | 0     | 0.001526  | 0.132 | 10933 |
| CENTROSOME                            | 56  | 0.27 | 2.41 | 0     | 0.0017435 | 0.152 | 5750  |
| REGULATION_OF_CELL_CYCLE              | 177 | 0.15 | 2.39 | 0.002 | 0.0019596 | 0.172 | 3790  |
| PORE_COMPLEX                          | 36  | 0.33 | 2.39 | 0     | 0.0019396 | 0.172 | 6580  |
| RNA_EXPORT_FROM_NUCLEUS               | 20  | 0.45 | 2.38 | 0     | 0.002034  | 0.182 | 3599  |
| AEROBIC_RESPIRATION                   | 15  | 0.5  | 2.35 | 0     | 0.0024926 | 0.218 | 5452  |
| DNA_HELICASE_ACTIVITY                 | 24  | 0.41 | 2.32 | 0     | 0.0029406 | 0.255 | 7740  |
| LIGASE_ACTIVITY                       | 94  | 0.21 | 2.32 | 0     | 0.0030217 | 0.263 | 4553  |
| ESTABLISHMENT_AND_OR_MAINTENANCE_C    | 77  | 0.22 | 2.31 | 0     | 0.003114  | 0.273 | 7475  |
| RIBONUCLEASE_ACTIVITY                 | 25  | 0.4  | 2.31 | 0     | 0.0032127 | 0.285 | 4435  |
| CHROMATIN_MODIFICATION                | 55  | 0.26 | 2.31 | 0.002 | 0.0031927 | 0.286 | 7446  |
| NUCLEOBASENUCLEOSIDENUCLEOTIDE_AND    | 31  | 0.35 | 2.29 | 0     | 0.0035496 | 0.317 | 3657  |
| DNA_DEPENDENT_ATPASE_ACTIVITY         | 22  | 0.41 | 2.28 | 0     | 0.0035659 | 0.32  | 5771  |
| REGULATION_OF_TRANSLATIONAL_INITIATIC | 28  | 0.36 | 2.25 | 0     | 0.004431  | 0.381 | 1821  |
| ENERGY_DERIVATION_BY_OXIDATION_OF_O   | 36  | 0.32 | 2.25 | 0     | 0.0044668 | 0.388 | 6765  |
| MICROTUBULE                           | 30  | 0.34 | 2.23 | 0.002 | 0.0053178 | 0.442 | 7786  |
| NUCLEAR_ENVELOPE                      | 72  | 0.22 | 2.21 | 0.002 | 0.005955  | 0.477 | 6338  |
| RNA_SPLICING_FACTOR_ACTIVITYTRANSESTE | 19  | 0.42 | 2.2  | 0     | 0.0060397 | 0.481 | 8647  |
| LIGASE_ACTIVITY_FORMING_CARBON_NITRC  | 67  | 0.23 | 2.18 | 0.002 | 0.0067538 | 0.528 | 8275  |
| PROTEIN_TRANSPORT                     | 152 | 0.15 | 2.16 | 0     | 0.0077929 | 0.574 | 6719  |
| ACID_AMINO_ACID_LIGASE_ACTIVITY       | 57  | 0.24 | 2.13 | 0.002 | 0.0094787 | 0.646 | 8104  |
| RIBONUCLEOTIDE_METABOLIC_PROCESS      | 15  | 0.45 | 2.11 | 0     | 0.0107778 | 0.698 | 5094  |
| PROTON_TRANSPORTING_TWO_SECTOR_ATI    | 15  | 0.44 | 2.09 | 0.002 | 0.0119253 | 0.736 | 5367  |
| MICROTUBULE_CYTOSKELETON_ORGANIZATI   | 33  | 0.3  | 2.08 | 0.006 | 0.0128761 | 0.764 | 2742  |
| DNA_RECOMBINATION                     | 47  | 0.25 | 2.06 | 0.002 | 0.0141296 | 0.796 | 2870  |
| NUCLEAR_MEMBRANE                      | 50  | 0.25 | 2.06 | 0     | 0.0140885 | 0.8   | 6338  |
| INTRACELLULAR_PROTEIN_TRANSPORT       | 141 | 0.15 | 2.05 | 0     | 0.0149136 | 0.827 | 4528  |
| ESTABLISHMENT_OF_PROTEIN_LOCALIZATIO  | 185 | 0.13 | 2.05 | 0.004 | 0.0152041 | 0.833 | 7338  |
| MRNA_BINDING                          | 22  | 0.37 | 2.03 | 0.004 | 0.017169  | 0.872 | 6415  |
| MITOTIC_SISTER_CHROMATID_SEGREGATION  | 16  | 0.42 | 2.02 | 0     | 0.0172391 | 0.875 | 1498  |
| PROTEIN_MODIFICATION_BY_SMALL_PROTEI  | 43  | 0.26 | 2.02 | 0.004 | 0.0172653 | 0.877 | 8688  |
| SMALL_CONJUGATING_PROTEIN_LIGASE_AC   | 51  | 0.24 | 2.01 | 0.008 | 0.0184011 | 0.897 | 8104  |
| CHROMOSOME_SEGREGATION                | 32  | 0.3  | 2.01 | 0.004 | 0.0185071 | 0.901 | 1862  |
| MICROTUBULE_ORGANIZING_CENTER_PART    | 19  | 0.38 | 2    | 0.002 | 0.0195922 | 0.91  | 3621  |
| PROTEIN_TARGETING                     | 108 | 0.16 | 1.97 | 0.004 | 0.0228002 | 0.932 | 5629  |
| PHOSPHATASE_REGULATOR_ACTIVITY        | 25  | 0.32 | 1.96 | 0.008 | 0.0236637 | 0.943 | 4330  |
| EXONUCLEASE_ACTIVITY                  | 19  | 0.38 | 1.96 | 0     | 0.0238019 | 0.945 | 3623  |
| NUCLEAR_EXPORT                        | 33  | 0.29 | 1.96 | 0.006 | 0.0239499 | 0.946 | 3599  |
| DNA_DAMAGE_CHECKPOINT                 | 19  | 0.36 | 1.94 | 0.006 | 0.0271678 | 0.967 | 3927  |
| SISTER_CHROMATID_SEGREGATION          | 17  | 0.39 | 1.93 | 0.008 | 0.0281053 | 0.97  | 1498  |
| NUCLEAR_CHROMOSOME                    | 52  | 0.23 | 1.92 | 0.004 | 0.0292856 | 0.977 | 4966  |
| NUCLEAR_TRANSPORT                     | 86  | 0.18 | 1.91 | 0.01  | 0.0302563 | 0.981 | 3785  |
| REGULATION_OF_MITOSIS                 | 40  | 0.26 | 1.91 | 0.01  | 0.0305927 | 0.981 | 1262  |

|                                       |     |      |      |       |           |       |       |
|---------------------------------------|-----|------|------|-------|-----------|-------|-------|
| MEDIATOR_COMPLEX                      | 18  | 0.38 | 1.91 | 0.008 | 0.0306269 | 0.982 | 2201  |
| SMALL_PROTEIN_CONJUGATING_ENZYME_A    | 52  | 0.23 | 1.9  | 0.01  | 0.0316691 | 0.985 | 8104  |
| TUBULIN_BINDING                       | 45  | 0.24 | 1.89 | 0.011 | 0.034726  | 0.99  | 2562  |
| GOLGI_APPARATUS_PART                  | 96  | 0.16 | 1.87 | 0.004 | 0.0376059 | 0.995 | 5627  |
| PHOSPHOTRANSFERASE_ACTIVITY_PHOSPHA   | 18  | 0.36 | 1.87 | 0.008 | 0.037624  | 0.995 | 3501  |
| MONOVALENT_INORGANIC_CATION_TRANSF    | 33  | 0.27 | 1.86 | 0.006 | 0.0382074 | 0.996 | 8238  |
| ORGANELLE_LOCALIZATION                | 24  | 0.31 | 1.86 | 0.018 | 0.0385921 | 0.997 | 1862  |
| MEIOTIC_CELL_CYCLE                    | 35  | 0.27 | 1.86 | 0.014 | 0.0388517 | 0.997 | 2870  |
| UBIQUITIN_PROTEIN_LIGASE_ACTIVITY     | 49  | 0.23 | 1.85 | 0.01  | 0.0390875 | 0.997 | 8104  |
| UBIQUITIN_CYCLE                       | 48  | 0.23 | 1.85 | 0.01  | 0.039222  | 0.998 | 5352  |
| HISTONE_ACETYLTRANSFERASE_ACTIVITY    | 16  | 0.38 | 1.84 | 0.018 | 0.0420917 | 0.998 | 4521  |
| PROTEIN_UBIQUITINATION                | 40  | 0.24 | 1.83 | 0.017 | 0.0433416 | 0.998 | 8688  |
| ER_TO_GOLGI_VESICLE_MEDIATED_TRANSPC  | 17  | 0.37 | 1.83 | 0.012 | 0.043888  | 0.998 | 2904  |
| DAMAGED_DNA_BINDING                   | 20  | 0.34 | 1.83 | 0.022 | 0.0440346 | 0.998 | 7435  |
| REGULATION_OF_CELLULAR_COMPONENT_C    | 118 | 0.14 | 1.83 | 0.008 | 0.0440416 | 0.998 | 6048  |
| NUCLEOCYTOPLASMIC_TRANSPORT           | 85  | 0.17 | 1.83 | 0.021 | 0.0438203 | 0.998 | 3785  |
| ACETYLTRANSFERASE_ACTIVITY            | 25  | 0.3  | 1.82 | 0.012 | 0.0437303 | 0.998 | 8277  |
| REGULATION_OF_DNA_REPLICATION         | 20  | 0.33 | 1.81 | 0.015 | 0.0460174 | 0.999 | 3927  |
| MITOCHONDRION_ORGANIZATION_AND_BIC    | 46  | 0.22 | 1.8  | 0.014 | 0.048121  | 1     | 6208  |
| MITOCHONDRIAL_RESPIRATORY_CHAIN       | 23  | 0.32 | 1.8  | 0.015 | 0.049284  | 1     | 5274  |
| DNA_REPLICATION_INITIATION            | 15  | 0.38 | 1.8  | 0.013 | 0.0501737 | 1     | 3927  |
| GUANYL_NUCLEOTIDE_EXCHANGE_FACTOR_    | 46  | 0.22 | 1.79 | 0.018 | 0.0523188 | 1     | 9698  |
| NUCLEOBASENUCLEOSIDE_AND_NUCLEOTIDI   | 51  | 0.21 | 1.78 | 0.027 | 0.0529904 | 1     | 5094  |
| DNA_POLYMERASE_ACTIVITY               | 18  | 0.34 | 1.78 | 0.018 | 0.0526805 | 1     | 7868  |
| UNFOLDED_PROTEIN_BINDING              | 41  | 0.23 | 1.77 | 0.022 | 0.0558528 | 1     | 4703  |
| CHROMATIN_REMODELING                  | 25  | 0.29 | 1.77 | 0.014 | 0.0564238 | 1     | 5533  |
| TRANSCRIPTION_ACTIVATOR_ACTIVITY      | 172 | 0.12 | 1.76 | 0.025 | 0.05713   | 1     | 3647  |
| PROTEIN_AMINO_ACID_N_LINKED_GLYCOSY   | 30  | 0.27 | 1.76 | 0.026 | 0.0572967 | 1     | 4758  |
| ESTABLISHMENT_OF_ORGANELLE_LOCALIZA   | 18  | 0.34 | 1.76 | 0.032 | 0.0584708 | 1     | 1862  |
| GLUCOSE_METABOLIC_PROCESS             | 28  | 0.28 | 1.74 | 0.01  | 0.0625718 | 1     | 5300  |
| NUCLEOTIDE_BIOSYNTHETIC_PROCESS       | 19  | 0.34 | 1.74 | 0.02  | 0.063041  | 1     | 10047 |
| TRANSFERASE_ACTIVITY_TRANSFERRING_ALH | 28  | 0.27 | 1.73 | 0.018 | 0.0657584 | 1     | 9270  |
| RESPONSE_TO_ORGANIC_SUBSTANCE         | 29  | 0.27 | 1.72 | 0.025 | 0.0690078 | 1     | 10758 |
| CONDENSED_NUCLEAR_CHROMOSOME          | 18  | 0.34 | 1.71 | 0.03  | 0.0722966 | 1     | 4966  |
| CYTOKINESIS                           | 18  | 0.34 | 1.71 | 0.032 | 0.0730998 | 1     | 7906  |
| APOPTOTIC_NUCLEAR_CHANGES             | 18  | 0.33 | 1.71 | 0.03  | 0.0736285 | 1     | 6024  |
| N_ACYLTRANSFERASE_ACTIVITY            | 24  | 0.29 | 1.71 | 0.02  | 0.0732113 | 1     | 8277  |
| HISTONE_MODIFICATION                  | 24  | 0.29 | 1.7  | 0.026 | 0.0738421 | 1     | 9842  |
| INOSITOL_OR_PHOSPHATIDYLINOSITOL_KIN  | 18  | 0.33 | 1.7  | 0.031 | 0.0744174 | 1     | 6087  |
| TRANSCRIPTION_COACTIVATOR_ACTIVITY    | 122 | 0.13 | 1.7  | 0.025 | 0.0742021 | 1     | 8574  |
| NUCLEAR_CHROMOSOME_PART               | 33  | 0.25 | 1.69 | 0.02  | 0.0770794 | 1     | 4871  |
| SINGLE_STRANDED_DNA_BINDING           | 33  | 0.25 | 1.68 | 0.035 | 0.0812054 | 1     | 2691  |
| STRUCTURE_SPECIFIC_DNA_BINDING        | 54  | 0.19 | 1.67 | 0.029 | 0.0830904 | 1     | 2870  |
| COFACTOR_METABOLIC_PROCESS            | 54  | 0.19 | 1.67 | 0.032 | 0.0833364 | 1     | 8590  |
| PROTEIN_C_TERMINUS_BINDING            | 70  | 0.17 | 1.67 | 0.038 | 0.0847242 | 1     | 6814  |
| INTRINSIC_TO_ORGANELLE_MEMBRANE       | 51  | 0.2  | 1.67 | 0.04  | 0.0848346 | 1     | 7012  |
| GTP_BINDING                           | 43  | 0.21 | 1.66 | 0.036 | 0.0874981 | 1     | 5872  |
| N_ACELYLTRANSFERASE_ACTIVITY          | 21  | 0.3  | 1.65 | 0.033 | 0.0897944 | 1     | 8277  |
| POSITIVE_REGULATION_OF_PHOSPHORYLATI  | 26  | 0.27 | 1.65 | 0.03  | 0.0900264 | 1     | 5576  |
| PROTEIN_AMINO_ACID_LIPIDATION         | 23  | 0.29 | 1.64 | 0.039 | 0.0943972 | 1     | 4958  |
| PROTEIN_IMPORT                        | 62  | 0.18 | 1.64 | 0.043 | 0.0948416 | 1     | 6719  |
| PEPTIDYL_AMINO_ACID_MODIFICATION      | 63  | 0.18 | 1.63 | 0.032 | 0.0968288 | 1     | 4587  |
| CELLULAR_COMPONENT_DISASSEMBLY        | 32  | 0.24 | 1.63 | 0.028 | 0.0967863 | 1     | 8054  |
| NUCLEAR_BODY                          | 31  | 0.25 | 1.63 | 0.031 | 0.0972644 | 1     | 2564  |
| INTRINSIC_TO_GOLGI_MEMBRANE           | 15  | 0.35 | 1.62 | 0.037 | 0.0988538 | 1     | 7012  |
| MEIOTIC_RECOMBINATION                 | 17  | 0.33 | 1.62 | 0.045 | 0.0984278 | 1     | 3623  |
| POSITIVE_REGULATION_OF_PROTEIN_MODIF  | 29  | 0.24 | 1.62 | 0.03  | 0.1023242 | 1     | 4931  |
| REGULATION_OF_PROTEIN_METABOLIC_PRC   | 167 | 0.11 | 1.61 | 0.034 | 0.1026857 | 1     | 8021  |
| HYDROGEN_ION_TRANSMEMBRANE_TRANSF     | 27  | 0.26 | 1.61 | 0.045 | 0.1024094 | 1     | 5274  |
| MICROTUBULE_BINDING                   | 31  | 0.25 | 1.61 | 0.049 | 0.1048693 | 1     | 2562  |
| MICROTUBULE_BASED_PROCESS             | 79  | 0.15 | 1.6  | 0.034 | 0.1055417 | 1     | 2742  |
| RAS_GUANYL_NUCLEOTIDE_EXCHANGE_FAC    | 19  | 0.31 | 1.6  | 0.052 | 0.1076924 | 1     | 8746  |
| REGULATION_OF_CYCLIN_DEPENDENT_PROT   | 42  | 0.21 | 1.6  | 0.045 | 0.1086744 | 1     | 5698  |
| CHROMATIN                             | 35  | 0.23 | 1.59 | 0.037 | 0.1106927 | 1     | 4150  |
| INTEGRAL_TO_ORGANELLE_MEMBRANE        | 49  | 0.18 | 1.58 | 0.057 | 0.113723  | 1     | 7012  |
| MACROMOLECULAR_COMPLEX_DISASSEMBL     | 15  | 0.33 | 1.58 | 0.048 | 0.1132282 | 1     | 7211  |
| UBIQUITIN_LIGASE_COMPLEX              | 26  | 0.26 | 1.58 | 0.049 | 0.1140445 | 1     | 5022  |
| COFACTOR_BIOSYNTHETIC_PROCESS         | 21  | 0.29 | 1.58 | 0.054 | 0.1142278 | 1     | 8590  |
| RNA_POLYMERASE_II_TRANSCRIPTION_FACT  | 181 | 0.1  | 1.58 | 0.047 | 0.1152211 | 1     | 4282  |
| INORGANIC_CATION_TRANSMEMBRANE_TRA    | 57  | 0.18 | 1.58 | 0.041 | 0.1152133 | 1     | 8238  |
| SECRETORY_PATHWAY                     | 81  | 0.15 | 1.57 | 0.06  | 0.1200102 | 1     | 3366  |

|                                       |     |      |      |       |           |   |       |
|---------------------------------------|-----|------|------|-------|-----------|---|-------|
| GTPASE_REGULATOR_ACTIVITY             | 123 | 0.12 | 1.57 | 0.052 | 0.1195898 | 1 | 11955 |
| ISOMERASE_ACTIVITY                    | 35  | 0.22 | 1.56 | 0.053 | 0.1208903 | 1 | 9450  |
| RNA_CATABOLIC_PROCESS                 | 22  | 0.28 | 1.56 | 0.058 | 0.1207908 | 1 | 10547 |
| GUANYL_NUCLEOTIDE_BINDING             | 44  | 0.2  | 1.56 | 0.056 | 0.1204475 | 1 | 5872  |
| HISTONE_DEACETYLASE_COMPLEX           | 20  | 0.29 | 1.55 | 0.05  | 0.1250101 | 1 | 7446  |
| NUCLEOTIDE_EXCISION_REPAIR            | 20  | 0.28 | 1.55 | 0.036 | 0.1247534 | 1 | 9378  |
| TRNA_METABOLIC_PROCESS                | 18  | 0.3  | 1.51 | 0.065 | 0.147658  | 1 | 4613  |
| POSITIVE_REGULATION_OF_TRANSCRIPTIONI | 118 | 0.12 | 1.51 | 0.046 | 0.1499894 | 1 | 11629 |
| POSITIVE_REGULATION_OF_RNA_METABOLIC  | 120 | 0.12 | 1.51 | 0.079 | 0.1513111 | 1 | 7400  |
| GOLGI_MEMBRANE                        | 43  | 0.19 | 1.5  | 0.069 | 0.1520378 | 1 | 7012  |
| LIPOPROTEIN_BIOSYNTHETIC_PROCESS      | 25  | 0.25 | 1.5  | 0.071 | 0.1551175 | 1 | 4958  |
| COVALENT_CHROMATIN_MODIFICATION       | 25  | 0.26 | 1.49 | 0.083 | 0.1590121 | 1 | 9842  |
| POSITIVE_REGULATION_OF_PROTEIN_AMINC  | 20  | 0.28 | 1.49 | 0.063 | 0.16183   | 1 | 4931  |
| ALCOHOL_METABOLIC_PROCESS             | 87  | 0.13 | 1.48 | 0.085 | 0.1646471 | 1 | 4869  |
| MONOOXYGENASE_ACTIVITY                | 29  | 0.23 | 1.46 | 0.066 | 0.1776193 | 1 | 12143 |
| ER_GOLGI_INTERMEDIATE_COMPARTMENT     | 24  | 0.25 | 1.46 | 0.07  | 0.1783043 | 1 | 7619  |
| PHOSPHOINOSITIDE_METABOLIC_PROCESS    | 30  | 0.23 | 1.46 | 0.094 | 0.1799774 | 1 | 4958  |
| SEQUENCE_SPECIFIC_DNA_BINDING         | 57  | 0.16 | 1.46 | 0.081 | 0.1807312 | 1 | 10388 |
| NUCLEOTIDE_METABOLIC_PROCESS          | 41  | 0.19 | 1.45 | 0.085 | 0.1833199 | 1 | 8003  |
| RESPONSE_TO_UV                        | 25  | 0.24 | 1.45 | 0.082 | 0.183231  | 1 | 7960  |
| COENZYME_METABOLIC_PROCESS            | 38  | 0.19 | 1.45 | 0.088 | 0.1842118 | 1 | 5094  |
| POSITIVE_REGULATION_OF_PHOSPHATE_ME   | 28  | 0.23 | 1.45 | 0.085 | 0.1835406 | 1 | 5576  |
| MITOTIC_CELL_CYCLE_CHECKPOINT         | 21  | 0.26 | 1.45 | 0.1   | 0.1853211 | 1 | 1262  |
| REGULATION_OF_TRANSLATION             | 90  | 0.13 | 1.45 | 0.066 | 0.1855509 | 1 | 1837  |
| DEOXYRIBONUCLEASE_ACTIVITY            | 22  | 0.25 | 1.44 | 0.091 | 0.1901669 | 1 | 3623  |
| PHOSPHOINOSITIDE_BIOSYNTHETIC_PROCES  | 23  | 0.25 | 1.44 | 0.085 | 0.1899773 | 1 | 4958  |
| NUCLEAR_ENVELOPE_ENDOPLASMIC_RETICL   | 91  | 0.13 | 1.41 | 0.098 | 0.2141808 | 1 | 3432  |
| ENDOPLASMIC_RETICULUM_MEMBRANE        | 82  | 0.13 | 1.4  | 0.088 | 0.2161597 | 1 | 6659  |
| REGULATION_OF_CELLULAR_PROTEIN_META   | 157 | 0.09 | 1.39 | 0.116 | 0.2269037 | 1 | 6135  |
| CELL_DIVISION                         | 20  | 0.26 | 1.39 | 0.106 | 0.2278685 | 1 | 7906  |
| PROTEIN_N_TERMINUS_BINDING            | 37  | 0.19 | 1.39 | 0.117 | 0.2290458 | 1 | 6812  |
| MEIOSIS_I                             | 20  | 0.27 | 1.39 | 0.107 | 0.2283077 | 1 | 6056  |
| POSITIVE_REGULATION_OF_TRANSCRIPTION  | 144 | 0.1  | 1.38 | 0.125 | 0.2340024 | 1 | 11633 |
| REGULATION_OF_PROTEIN_MODIFICATION_I  | 44  | 0.17 | 1.37 | 0.124 | 0.2424216 | 1 | 8816  |
| POSITIVE_REGULATION_OF_NUCLEOBASENU   | 154 | 0.09 | 1.37 | 0.127 | 0.2439105 | 1 | 12302 |
| PEROXISOME_ORGANIZATION_AND_BIOGEN    | 16  | 0.28 | 1.36 | 0.12  | 0.2473082 | 1 | 7338  |
| PROTEOLYSIS                           | 184 | 0.09 | 1.35 | 0.124 | 0.2585939 | 1 | 9188  |
| MEMBRANE_COAT                         | 15  | 0.29 | 1.35 | 0.129 | 0.257766  | 1 | 5576  |
| REGULATION_OF_CATABOLIC_PROCESS       | 16  | 0.28 | 1.35 | 0.132 | 0.2596395 | 1 | 10771 |
| DNA_CATABOLIC_PROCESS                 | 22  | 0.24 | 1.35 | 0.136 | 0.2591224 | 1 | 8054  |
| ACTIN_FILAMENT_BINDING                | 25  | 0.22 | 1.35 | 0.133 | 0.2599459 | 1 | 6814  |
| POSITIVE_REGULATION_OF_I_KAPPAB_KINAS | 85  | 0.12 | 1.34 | 0.145 | 0.2612431 | 1 | 10774 |
| COATED_MEMBRANE                       | 15  | 0.29 | 1.34 | 0.149 | 0.2605071 | 1 | 5576  |
| REGULATION_OF_PHOSPHORYLATION         | 48  | 0.16 | 1.34 | 0.145 | 0.2638062 | 1 | 5712  |
| TRANSFERASE_ACTIVITY_TRANSFERRING_GR  | 49  | 0.16 | 1.34 | 0.143 | 0.2646159 | 1 | 4521  |
| MICROTUBULE_ORGANIZING_CENTER_ORGA    | 15  | 0.29 | 1.34 | 0.147 | 0.2639838 | 1 | 5643  |
| SMALL_GTPASE_REGULATOR_ACTIVITY       | 67  | 0.14 | 1.33 | 0.14  | 0.2649767 | 1 | 14777 |
| ESTABLISHMENT_AND_OR_MAINTENANCE_C    | 17  | 0.26 | 1.32 | 0.155 | 0.2755683 | 1 | 11192 |
| RESPONSE_TO_HORMONE_STIMULUS          | 32  | 0.2  | 1.32 | 0.164 | 0.2799171 | 1 | 4309  |
| NUCLEAR_IMPORT                        | 49  | 0.16 | 1.32 | 0.149 | 0.2816584 | 1 | 6719  |
| DNA_DAMAGE_RESPONSESIGNAL_TRANSDUC    | 34  | 0.19 | 1.31 | 0.156 | 0.2864835 | 1 | 2504  |
| ENZYME_BINDING                        | 174 | 0.09 | 1.31 | 0.145 | 0.2854842 | 1 | 8331  |
| CHROMATIN_BINDING                     | 32  | 0.19 | 1.3  | 0.136 | 0.2934912 | 1 | 4966  |
| METHYLTRANSFERASE_ACTIVITY            | 36  | 0.18 | 1.29 | 0.158 | 0.3028419 | 1 | 3724  |
| GENERATION_OF_PRECURSOR_METABOLITE    | 122 | 0.1  | 1.29 | 0.175 | 0.3051191 | 1 | 7856  |
| CHROMATIN_ASSEMBLY_OR_DISASSEMBLY     | 26  | 0.21 | 1.29 | 0.171 | 0.3083173 | 1 | 8772  |
| TRANS_GOLGI_NETWORK                   | 21  | 0.24 | 1.28 | 0.185 | 0.3135859 | 1 | 11201 |
| TRANSFERASE_ACTIVITY_TRANSFERRING_ON  | 37  | 0.17 | 1.28 | 0.175 | 0.3127476 | 1 | 1743  |
| MITOCHONDRIAL_TRANSPORT               | 20  | 0.24 | 1.27 | 0.196 | 0.3285474 | 1 | 3857  |
| COATED_VESICLE_MEMBRANE               | 15  | 0.27 | 1.26 | 0.198 | 0.3366046 | 1 | 1196  |
| INTERPHASE_OF_MITOTIC_CELL_CYCLE      | 62  | 0.14 | 1.25 | 0.184 | 0.3430329 | 1 | 6300  |
| PROTEIN_HETERODIMERIZATION_ACTIVITY   | 76  | 0.12 | 1.25 | 0.192 | 0.3461332 | 1 | 8789  |
| MITOCHONDRIAL_OUTER_MEMBRANE          | 17  | 0.25 | 1.24 | 0.175 | 0.353391  | 1 | 2882  |
| CARBOHYDRATE_KINASE_ACTIVITY          | 15  | 0.26 | 1.24 | 0.217 | 0.3531388 | 1 | 10960 |
| NUCLEOBASENUCLEOSIDENUCLEOTIDE_KINA   | 25  | 0.21 | 1.24 | 0.208 | 0.3522619 | 1 | 4198  |
| LEADING_EDGE                          | 47  | 0.15 | 1.24 | 0.186 | 0.3547705 | 1 | 5769  |
| REGULATION_OF_PROTEIN_AMINO_ACID_PH   | 30  | 0.19 | 1.24 | 0.204 | 0.3575871 | 1 | 5576  |
| MICROTUBULE_ASSOCIATED_COMPLEX        | 46  | 0.15 | 1.23 | 0.178 | 0.3573947 | 1 | 5108  |
| SECRETION_BY_CELL                     | 113 | 0.1  | 1.23 | 0.205 | 0.3647618 | 1 | 3491  |
| PROTEIN_IMPORT_INTO_NUCLEUS           | 48  | 0.15 | 1.22 | 0.233 | 0.3678567 | 1 | 6719  |
| SH2_DOMAIN_BINDING                    | 15  | 0.26 | 1.22 | 0.215 | 0.3685336 | 1 | 7291  |

|                                      |     |      |      |       |           |   |       |
|--------------------------------------|-----|------|------|-------|-----------|---|-------|
| ENDOPLASMIC_RETICULUM_PART           | 93  | 0.11 | 1.22 | 0.207 | 0.3708213 | 1 | 7200  |
| TRANSFERASE_ACTIVITY_TRANSFERRING_AC | 59  | 0.13 | 1.21 | 0.229 | 0.3811329 | 1 | 2819  |
| REGULATION_OF_PROTEIN_STABILITY      | 19  | 0.23 | 1.21 | 0.241 | 0.3874862 | 1 | 5364  |
| PROTEIN_COMPLEX_ASSEMBLY             | 162 | 0.08 | 1.2  | 0.244 | 0.3929992 | 1 | 5785  |
| PIGMENT_BIOSYNTHETIC_PROCESS         | 17  | 0.25 | 1.2  | 0.24  | 0.396801  | 1 | 7250  |
| INTERPHASE                           | 68  | 0.12 | 1.2  | 0.244 | 0.3979042 | 1 | 6300  |
| ENDOSOME_TRANSPORT                   | 23  | 0.21 | 1.19 | 0.255 | 0.4020253 | 1 | 11122 |
| GOLGI_ASSOCIATED_VESICLE             | 27  | 0.19 | 1.19 | 0.234 | 0.4073514 | 1 | 3262  |
| CHLORIDE_CHANNEL_ACTIVITY            | 19  | 0.23 | 1.19 | 0.25  | 0.4071226 | 1 | 8262  |
| PHAGOCYTOSIS                         | 16  | 0.24 | 1.19 | 0.244 | 0.4059333 | 1 | 13703 |
| GLYCOPROTEIN_BIOSYNTHETIC_PROCESS    | 74  | 0.12 | 1.18 | 0.239 | 0.4079241 | 1 | 10136 |
| PROTEIN_PROCESSING                   | 48  | 0.14 | 1.18 | 0.248 | 0.4076695 | 1 | 10976 |
| PHOSPHORIC_ESTER_HYDROLASE_ACTIVITY  | 149 | 0.08 | 1.18 | 0.225 | 0.4082036 | 1 | 13811 |
| RESPONSE_TO_TEMPERATURE_STIMULUS     | 15  | 0.25 | 1.18 | 0.261 | 0.4127545 | 1 | 1535  |
| CELLULAR_PROTEIN_COMPLEX_ASSEMBLY    | 32  | 0.17 | 1.18 | 0.243 | 0.412146  | 1 | 5899  |
| RESPONSE_TO_BIOTIC_STIMULUS          | 114 | 0.09 | 1.18 | 0.247 | 0.4121309 | 1 | 13860 |
| REGULATION_OF_I_KAPPAB_KINASE_NF_KAF | 91  | 0.11 | 1.17 | 0.25  | 0.4179176 | 1 | 10774 |
| THYROID_HORMONE_RECEPTOR_BINDING     | 17  | 0.23 | 1.16 | 0.264 | 0.4258486 | 1 | 4282  |
| RESPONSE_TO ABIOTIC_STIMULUS         | 83  | 0.11 | 1.16 | 0.271 | 0.4287692 | 1 | 11536 |
| HORMONE_RECEPTOR_BINDING             | 29  | 0.18 | 1.16 | 0.284 | 0.4284073 | 1 | 4861  |
| ENZYME_ACTIVATOR_ACTIVITY            | 120 | 0.09 | 1.16 | 0.261 | 0.4336155 | 1 | 14520 |
| MEMBRANE_LIPID_BIOSYNTHETIC_PROCESS  | 48  | 0.14 | 1.15 | 0.276 | 0.438411  | 1 | 5034  |
| RESPONSE_TO_BACTERIUM                | 29  | 0.18 | 1.14 | 0.263 | 0.4510156 | 1 | 13611 |
| VESICLE_MEDIATED_TRANSPORT           | 189 | 0.07 | 1.13 | 0.291 | 0.4622929 | 1 | 15959 |
| RAS_PROTEIN_SIGNAL_TRANSDUCTION      | 65  | 0.12 | 1.13 | 0.305 | 0.4656126 | 1 | 9838  |
| ANION_CATION_SYMPORTER_ACTIVITY      | 16  | 0.24 | 1.13 | 0.288 | 0.4648375 | 1 | 12649 |
| POSITIVE_REGULATION_OF_PROTEIN_METAI | 74  | 0.11 | 1.13 | 0.291 | 0.4684199 | 1 | 8996  |
| KINASE_BINDING                       | 68  | 0.12 | 1.13 | 0.286 | 0.4674736 | 1 | 11445 |
| POSITIVE_REGULATION_OF_TRANSCRIPTION | 65  | 0.12 | 1.12 | 0.292 | 0.4705558 | 1 | 4282  |
| INTRAMOLECULAR_OXIDOREDUCTASE_ACTIV  | 19  | 0.21 | 1.12 | 0.31  | 0.4718874 | 1 | 2895  |
| CELL_SUBSTRATE_ADHESION              | 38  | 0.15 | 1.12 | 0.289 | 0.4737092 | 1 | 9143  |
| ACTIN_BINDING                        | 76  | 0.11 | 1.11 | 0.308 | 0.4786494 | 1 | 9473  |
| RUFFLE                               | 31  | 0.17 | 1.11 | 0.305 | 0.4773997 | 1 | 5769  |
| INDUCTION_OF_APOPTOSIS_BY_EXTRACELL  | 25  | 0.19 | 1.11 | 0.32  | 0.4765128 | 1 | 11068 |
| COATED_VESICLE                       | 43  | 0.14 | 1.11 | 0.315 | 0.4854083 | 1 | 8368  |
| TRANSFERASE_ACTIVITY_TRANSFERRING_HE | 80  | 0.11 | 1.1  | 0.327 | 0.4916188 | 1 | 10065 |
| REGULATION_OF_CELL_MIGRATION         | 28  | 0.17 | 1.09 | 0.337 | 0.5018703 | 1 | 11741 |
| ATPASE_ACTIVITY_COUPLED_TO_TRANSMEM  | 24  | 0.18 | 1.09 | 0.33  | 0.5043768 | 1 | 13241 |
| LIPID_TRANSPORTER_ACTIVITY           | 28  | 0.17 | 1.09 | 0.339 | 0.5051969 | 1 | 12367 |
| PROTEIN_AMINO_ACID_AUTOPHOSPHORYLA   | 30  | 0.17 | 1.09 | 0.356 | 0.5064648 | 1 | 10204 |
| FEEDING_BEHAVIOR                     | 24  | 0.19 | 1.08 | 0.357 | 0.5136158 | 1 | 13940 |
| TRANSFERASE_ACTIVITY_TRANSFERRING_GL | 110 | 0.09 | 1.08 | 0.333 | 0.5120255 | 1 | 10065 |
| GTPASE_ACTIVITY                      | 97  | 0.1  | 1.08 | 0.347 | 0.5116993 | 1 | 7229  |
| ORGANELLE_OUTER_MEMBRANE             | 23  | 0.19 | 1.08 | 0.367 | 0.5197569 | 1 | 2882  |
| REGULATION_OF_ORGANELLE_ORGANIZATI   | 38  | 0.15 | 1.08 | 0.362 | 0.5192235 | 1 | 5938  |
| GLYCOPROTEIN_METABOLIC_PROCESS       | 90  | 0.1  | 1.07 | 0.371 | 0.5208495 | 1 | 9929  |
| VESICULAR_FRACTION                   | 44  | 0.13 | 1.06 | 0.358 | 0.5342453 | 1 | 3330  |
| PIGMENT_METABOLIC_PROCESS            | 18  | 0.21 | 1.05 | 0.375 | 0.5477152 | 1 | 7250  |
| DOUBLE_STRANDED_DNA_BINDING          | 32  | 0.16 | 1.05 | 0.383 | 0.5515322 | 1 | 3351  |
| ELECTRON_TRANSPORT_GO_0006118        | 51  | 0.13 | 1.04 | 0.389 | 0.5708567 | 1 | 6243  |
| SMALL_GTPASE_MEDIATED_SIGNAL_TRANSC  | 86  | 0.1  | 1.03 | 0.421 | 0.5803943 | 1 | 9838  |
| ANION_CHANNEL_ACTIVITY               | 20  | 0.19 | 1.03 | 0.391 | 0.5817772 | 1 | 8262  |
| NUCLEAR_HORMONE_RECEPTOR_BINDING     | 28  | 0.17 | 1.03 | 0.401 | 0.5837079 | 1 | 13755 |
| CARBON_OXYGEN_LYASE_ACTIVITY         | 31  | 0.15 | 1.02 | 0.423 | 0.5912336 | 1 | 10659 |
| TRANSFERASE_ACTIVITY_TRANSFERRING_PE | 20  | 0.19 | 1.02 | 0.421 | 0.5916135 | 1 | 11903 |
| PROTEIN_DOMAIN_SPECIFIC_BINDING      | 70  | 0.1  | 1.02 | 0.396 | 0.5936737 | 1 | 7435  |
| MOTOR_ACTIVITY                       | 27  | 0.16 | 1.02 | 0.403 | 0.5932146 | 1 | 4398  |
| REGULATION_OF_G_PROTEIN_COUPLED_REC  | 22  | 0.18 | 1.02 | 0.405 | 0.5935388 | 1 | 10699 |
| CYTOPLASMIC_VESICLE_MEMBRANE         | 26  | 0.16 | 1.02 | 0.403 | 0.5957698 | 1 | 1196  |
| DI__TRI__VALENT_INORGANIC_CATION_TRA | 22  | 0.18 | 1.01 | 0.421 | 0.5955539 | 1 | 14821 |
| CELL_MATRIX_ADHESION                 | 37  | 0.14 | 1.01 | 0.445 | 0.59645   | 1 | 9143  |
| OUTER_MEMBRANE                       | 24  | 0.17 | 1.01 | 0.41  | 0.5953157 | 1 | 2882  |
| PROTEIN_DIMERIZATION_ACTIVITY        | 178 | 0.07 | 1.01 | 0.419 | 0.5988138 | 1 | 14865 |
| PRIMARY_ACTIVE_TRANSMEMBRANE_TRAN    | 40  | 0.13 | 1.01 | 0.42  | 0.6038892 | 1 | 13439 |
| INORGANIC_ANION_TRANSMEMBRANE_TRA    | 19  | 0.19 | 1    | 0.428 | 0.6044837 | 1 | 12816 |
| PHOSPHORIC_DIESTER_HYDROLASE_ACTIVIT | 40  | 0.13 | 1    | 0.462 | 0.6127294 | 1 | 14796 |
| CYTOPLASMIC_VESICLE_PART             | 26  | 0.16 | 1    | 0.437 | 0.6129253 | 1 | 1196  |
| RESPONSE_TO_RADIATION                | 56  | 0.11 | 0.99 | 0.448 | 0.619849  | 1 | 10846 |
| REGULATION_OF_CELL_GROWTH            | 43  | 0.13 | 0.99 | 0.443 | 0.6195851 | 1 | 10320 |
| ATPASE_ACTIVITY_COUPLED_TO_MOVEMEN   | 40  | 0.13 | 0.99 | 0.417 | 0.6206257 | 1 | 13439 |
| CYSTEINE_TYPE_ENDOPEPTIDASE_ACTIVITY | 40  | 0.13 | 0.99 | 0.465 | 0.6237305 | 1 | 8940  |

|                                       |     |      |      |       |           |   |       |
|---------------------------------------|-----|------|------|-------|-----------|---|-------|
| STRUCTURAL_CONSTITUENT_OF_CYTOSKELE   | 56  | 0.11 | 0.99 | 0.447 | 0.6242542 | 1 | 7634  |
| LIPID_BIOSYNTHETIC_PROCESS            | 96  | 0.09 | 0.99 | 0.474 | 0.6237072 | 1 | 5034  |
| CELL_STRUCTURE_DISASSEMBLY_DURING_AI  | 17  | 0.2  | 0.98 | 0.465 | 0.6243214 | 1 | 8054  |
| GTPASE_BINDING                        | 34  | 0.14 | 0.98 | 0.445 | 0.6263732 | 1 | 10199 |
| POSITIVE_REGULATION_OF_CELLULAR_PROT  | 72  | 0.1  | 0.98 | 0.456 | 0.6303877 | 1 | 8996  |
| POSITIVE_REGULATION_OF_BINDING        | 26  | 0.16 | 0.98 | 0.456 | 0.6287155 | 1 | 4114  |
| MICROSOME                             | 42  | 0.13 | 0.98 | 0.495 | 0.6308575 | 1 | 3330  |
| DEPHOSPHORYLATION                     | 68  | 0.1  | 0.97 | 0.482 | 0.640869  | 1 | 12545 |
| POSITIVE_REGULATION_OF_CELL_PROLIFERA | 147 | 0.07 | 0.97 | 0.453 | 0.6418493 | 1 | 8133  |
| RHO_GTPASE_ACTIVATOR_ACTIVITY         | 19  | 0.19 | 0.97 | 0.49  | 0.6445515 | 1 | 13766 |
| PROTEIN_AUTOPROCESSING                | 31  | 0.15 | 0.96 | 0.489 | 0.6478772 | 1 | 10204 |
| HYDROLASE_ACTIVITY_ACTING_ON_ACID_AN  | 39  | 0.13 | 0.96 | 0.495 | 0.6507243 | 1 | 13439 |
| PHOSPHORIC_MONOESTER_HYDROLASE_ACTI   | 108 | 0.08 | 0.96 | 0.479 | 0.6502913 | 1 | 12153 |
| VIRAL_GENOME_REPLICATION              | 21  | 0.17 | 0.96 | 0.499 | 0.6488931 | 1 | 2017  |
| DEFENSE_RESPONSE_TO_BACTERIUM         | 24  | 0.16 | 0.95 | 0.496 | 0.6571185 | 1 | 13611 |
| EXTRACELLULAR_LIGAND_GATED_ION_CHAN   | 22  | 0.17 | 0.95 | 0.522 | 0.6622171 | 1 | 12560 |
| APICAL_PART_OF_CELL                   | 16  | 0.2  | 0.95 | 0.507 | 0.6655374 | 1 | 9896  |
| REGULATION_OF_BLOOD_PRESSURE          | 22  | 0.17 | 0.94 | 0.511 | 0.6674599 | 1 | 11731 |
| HYDRO_LYASE_ACTIVITY                  | 27  | 0.15 | 0.94 | 0.513 | 0.6668181 | 1 | 10659 |
| ATPASE_ACTIVITY_COUPLED_TO_TRANSMEM   | 20  | 0.17 | 0.94 | 0.513 | 0.666437  | 1 | 14056 |
| OXIDOREDUCTASE_ACTIVITY_ACTING_ON_TH  | 22  | 0.17 | 0.94 | 0.513 | 0.6726957 | 1 | 7663  |
| CARBOHYDRATE_TRANSPORT                | 18  | 0.18 | 0.94 | 0.509 | 0.6739717 | 1 | 10757 |
| RESPONSE_TO_LIGHT_STIMULUS            | 43  | 0.12 | 0.93 | 0.537 | 0.6769325 | 1 | 7960  |
| SH3_DOMAIN_BINDING                    | 15  | 0.2  | 0.93 | 0.528 | 0.6777821 | 1 | 9667  |
| VESICLE_MEMBRANE                      | 28  | 0.15 | 0.93 | 0.52  | 0.6769146 | 1 | 1196  |
| CYTOSKELETAL_PROTEIN_BINDING          | 156 | 0.06 | 0.93 | 0.532 | 0.6848877 | 1 | 10018 |
| SMALL_GTPASE_BINDING                  | 33  | 0.13 | 0.92 | 0.549 | 0.6849805 | 1 | 12905 |
| G1_PHASE                              | 15  | 0.2  | 0.92 | 0.561 | 0.6907011 | 1 | 7323  |
| RAS_GTPASE_BINDING                    | 25  | 0.15 | 0.92 | 0.546 | 0.6955432 | 1 | 15296 |
| EXCRETION                             | 36  | 0.13 | 0.92 | 0.559 | 0.6950568 | 1 | 13231 |
| LAMELLIPODIUM                         | 25  | 0.16 | 0.91 | 0.561 | 0.6951398 | 1 | 9451  |
| HYDROLASE_ACTIVITY_ACTING_ON_CARBON   | 21  | 0.17 | 0.91 | 0.521 | 0.7010029 | 1 | 9052  |
| GLYCOLIPID_METABOLIC_PROCESS          | 16  | 0.19 | 0.91 | 0.551 | 0.6994799 | 1 | 8996  |
| CARBOHYDRATE_METABOLIC_PROCESS        | 177 | 0.06 | 0.91 | 0.582 | 0.7008496 | 1 | 9336  |
| POSITIVE_REGULATION_OF_CELL_DIFFERENT | 25  | 0.15 | 0.91 | 0.57  | 0.7028377 | 1 | 3759  |
| RHO_PROTEIN_SIGNAL_TRANSDUCTION       | 38  | 0.12 | 0.91 | 0.58  | 0.7019655 | 1 | 9667  |
| REGULATION_OF_SMALL_GTPASE_MEDIATEE   | 23  | 0.16 | 0.9  | 0.59  | 0.7035962 | 1 | 9667  |
| TRANSITION_METAL_ION_BINDING          | 107 | 0.08 | 0.9  | 0.567 | 0.7048617 | 1 | 1354  |
| NEURON_APOPTOSIS                      | 17  | 0.18 | 0.9  | 0.563 | 0.7036156 | 1 | 8435  |
| EXCITATORY_EXTRACELLULAR_LIGAND_GATE  | 21  | 0.16 | 0.9  | 0.548 | 0.7067341 | 1 | 12560 |
| T_CELL_ACTIVATION                     | 42  | 0.12 | 0.89 | 0.566 | 0.7178453 | 1 | 12123 |
| ICOSANOID_METABOLIC_PROCESS           | 16  | 0.19 | 0.89 | 0.561 | 0.7178978 | 1 | 10158 |
| LIPOPROTEIN_METABOLIC_PROCESS         | 32  | 0.13 | 0.89 | 0.543 | 0.7173172 | 1 | 4958  |
| MICROTUBULE_MOTOR_ACTIVITY            | 15  | 0.19 | 0.89 | 0.608 | 0.7164925 | 1 | 14704 |
| CELLULAR_CARBOHYDRATE_METABOLIC_PRC   | 124 | 0.07 | 0.89 | 0.596 | 0.7152607 | 1 | 5477  |
| AROMATIC_COMPOUND_METABOLIC_PROCI     | 26  | 0.14 | 0.89 | 0.612 | 0.7158351 | 1 | 14783 |
| OXYGEN_AND_REACTIVE_OXYGEN_SPECIES_   | 20  | 0.16 | 0.89 | 0.608 | 0.7170757 | 1 | 1559  |
| NUCLEAR_ORGANIZATION_AND_BIOGENESIS   | 29  | 0.14 | 0.88 | 0.573 | 0.7179056 | 1 | 6858  |
| GLYCEROPHOSPHOLIPID_BIOSYNTHETIC_PRC  | 29  | 0.14 | 0.88 | 0.6   | 0.7182066 | 1 | 4958  |
| PROTEIN_AMINO_ACID_DEPHOSPHORYLATIC   | 61  | 0.09 | 0.88 | 0.616 | 0.7213091 | 1 | 13120 |
| CARBOHYDRATE_TRANSMEMBRANE_TRANSF     | 15  | 0.19 | 0.87 | 0.613 | 0.7361823 | 1 | 11104 |
| DENDRITE                              | 16  | 0.18 | 0.87 | 0.629 | 0.7359166 | 1 | 9104  |
| EXTERNAL_SIDE_OF_PLASMA_MEMBRANE      | 15  | 0.18 | 0.86 | 0.624 | 0.7522797 | 1 | 14781 |
| CELL_CORTEX_PART                      | 23  | 0.15 | 0.85 | 0.648 | 0.762871  | 1 | 6768  |
| APOPTOTIC_PROGRAM                     | 58  | 0.1  | 0.85 | 0.635 | 0.76125   | 1 | 6074  |
| CALMODULIN_BINDING                    | 25  | 0.14 | 0.85 | 0.659 | 0.7662347 | 1 | 14118 |
| ZINC_ION_BINDING                      | 86  | 0.08 | 0.84 | 0.667 | 0.7728202 | 1 | 1558  |
| ATP_BINDING                           | 149 | 0.06 | 0.84 | 0.652 | 0.7784304 | 1 | 16167 |
| SECONDARY_METABOLIC_PROCESS           | 26  | 0.14 | 0.84 | 0.672 | 0.777356  | 1 | 7250  |
| GLYCOSAMINOGLYCAN_BINDING             | 34  | 0.12 | 0.83 | 0.61  | 0.7830359 | 1 | 8468  |
| PHOSPHOLIPASE_C_ACTIVITY              | 15  | 0.17 | 0.83 | 0.692 | 0.7868146 | 1 | 13730 |
| ADENYL_NUCLEOTIDE_BINDING             | 162 | 0.06 | 0.83 | 0.673 | 0.789273  | 1 | 16167 |
| SECRETION                             | 175 | 0.05 | 0.82 | 0.669 | 0.7936855 | 1 | 14124 |
| DETECTION_OF_EXTERNAL_STIMULUS        | 21  | 0.15 | 0.82 | 0.707 | 0.7951261 | 1 | 11928 |
| DRUG_BINDING                          | 16  | 0.17 | 0.82 | 0.683 | 0.8023614 | 1 | 4854  |
| ACTIN_CYTOSKELETON                    | 127 | 0.06 | 0.81 | 0.695 | 0.8050538 | 1 | 7126  |
| ONE_CARBON_COMPOUND_METABOLIC_PRC     | 26  | 0.13 | 0.81 | 0.699 | 0.8068487 | 1 | 5956  |
| EMBRYONIC_DEVELOPMENT                 | 56  | 0.09 | 0.81 | 0.691 | 0.8099189 | 1 | 4479  |
| REGULATION_OF_RAS_PROTEIN_SIGNAL_TR/  | 19  | 0.15 | 0.8  | 0.706 | 0.8198425 | 1 | 9667  |
| COENZYME_BINDING                      | 16  | 0.17 | 0.8  | 0.708 | 0.822352  | 1 | 11702 |
| PURINE_RIBONUCLEOTIDE_BINDING         | 195 | 0.05 | 0.79 | 0.729 | 0.8249762 | 1 | 3674  |

|                                      |     |      |      |       |           |   |       |
|--------------------------------------|-----|------|------|-------|-----------|---|-------|
| DOUBLE_STRANDED_RNA_BINDING          | 17  | 0.16 | 0.79 | 0.74  | 0.8257941 | 1 | 5617  |
| ADENYL_RIBONUCLEOTIDE_BINDING        | 156 | 0.05 | 0.79 | 0.754 | 0.8267236 | 1 | 16167 |
| ANION_TRANSMEMBRANE_TRANSPORTER_A    | 59  | 0.09 | 0.78 | 0.724 | 0.8352163 | 1 | 12816 |
| PROTEIN_KINASE_BINDING               | 60  | 0.08 | 0.77 | 0.766 | 0.8542843 | 1 | 11445 |
| CLATHRIN_COATED_VESICLE              | 35  | 0.11 | 0.76 | 0.78  | 0.8632302 | 1 | 8368  |
| RESPONSE_TO_OXIDATIVE_STRESS         | 44  | 0.1  | 0.76 | 0.768 | 0.8651534 | 1 | 9339  |
| FEMALE_GAMETE_GENERATION             | 16  | 0.16 | 0.76 | 0.782 | 0.8667259 | 1 | 15248 |
| SIGNAL_SEQUENCE_BINDING              | 15  | 0.16 | 0.76 | 0.777 | 0.8666504 | 1 | 12689 |
| HETEROCYCLE_METABOLIC_PROCESS        | 26  | 0.12 | 0.75 | 0.794 | 0.8690425 | 1 | 4749  |
| POSITIVE_REGULATION_OF_CYTOKINE_PROD | 15  | 0.16 | 0.75 | 0.776 | 0.8688683 | 1 | 7960  |
| TRANSCRIPTION_COREPRESSOR_ACTIVITY   | 89  | 0.07 | 0.75 | 0.786 | 0.8680415 | 1 | 1430  |
| L_AMINO_ACID_TRANSMEMBRANE_TRANSP    | 16  | 0.15 | 0.75 | 0.782 | 0.8755097 | 1 | 5146  |
| REGULATION_OF_GENE_EXPRESSION_EPIGEI | 30  | 0.12 | 0.74 | 0.783 | 0.8754586 | 1 | 6338  |
| GTPASE_ACTIVATOR_ACTIVITY            | 58  | 0.08 | 0.74 | 0.782 | 0.8742883 | 1 | 13766 |
| SULFUR_METABOLIC_PROCESS             | 37  | 0.1  | 0.74 | 0.81  | 0.8727968 | 1 | 8952  |
| CELL_SUBSTRATE_ADHERENS_JUNCTION     | 15  | 0.16 | 0.74 | 0.802 | 0.8773028 | 1 | 15242 |
| REGULATION_OF_MITOTIC_CELL_CYCLE     | 23  | 0.12 | 0.73 | 0.804 | 0.8870936 | 1 | 10320 |
| PROTEIN_SECRETION                    | 32  | 0.11 | 0.72 | 0.825 | 0.9026672 | 1 | 4859  |
| CELLULAR_RESPONSE_TO_STIMULUS        | 18  | 0.14 | 0.72 | 0.804 | 0.9010868 | 1 | 4537  |
| MICROTUBULE_BASED_MOVEMENT           | 15  | 0.15 | 0.72 | 0.835 | 0.9010982 | 1 | 3292  |
| REGULATION_OF_GROWTH                 | 55  | 0.08 | 0.71 | 0.818 | 0.9088881 | 1 | 10340 |
| NEGATIVE_REGULATION_OF_CELL_MIGRATIC | 15  | 0.15 | 0.7  | 0.845 | 0.9146273 | 1 | 11741 |
| CYSTEINE_TYPE_PEPTIDASE_ACTIVITY     | 54  | 0.08 | 0.69 | 0.859 | 0.9244298 | 1 | 16302 |
| CHROMATIN_REMODELING_COMPLEX         | 17  | 0.14 | 0.69 | 0.879 | 0.9243422 | 1 | 2848  |
| INTERMEDIATE_FILAMENT_CYTOSKELETON   | 23  | 0.12 | 0.68 | 0.851 | 0.9299429 | 1 | 7293  |
| NEGATIVE_REGULATION_OF_TRANSPORT     | 20  | 0.13 | 0.68 | 0.853 | 0.9325887 | 1 | 6673  |
| INTERMEDIATE_FILAMENT                | 23  | 0.12 | 0.67 | 0.871 | 0.9409125 | 1 | 7293  |
| CELL_PROJECTION_BIOGENESIS           | 24  | 0.11 | 0.67 | 0.871 | 0.9394405 | 1 | 10751 |
| PROTEIN_BINDING_BRIDGING             | 57  | 0.07 | 0.67 | 0.868 | 0.9380548 | 1 | 7243  |
| INTRACELLULAR_RECEPTOR_MEDIATED_SIG  | 21  | 0.12 | 0.67 | 0.886 | 0.9366689 | 1 | 14193 |
| ANTIOXIDANT_ACTIVITY                 | 17  | 0.14 | 0.66 | 0.888 | 0.9449276 | 1 | 15623 |
| RAS_GTPASE_ACTIVATOR_ACTIVITY        | 29  | 0.1  | 0.66 | 0.906 | 0.9488927 | 1 | 13766 |
| HOMEOSTASIS_OF_NUMBER_OF_CELLS       | 20  | 0.12 | 0.65 | 0.877 | 0.9478623 | 1 | 3189  |
| CELLULAR_CARBOHYDRATE_CATABOLIC_PRC  | 21  | 0.12 | 0.65 | 0.891 | 0.9474584 | 1 | 13318 |
| NEGATIVE_REGULATION_OF_MAP_KINASE_A  | 17  | 0.13 | 0.65 | 0.879 | 0.9462143 | 1 | 2990  |
| LYSOSOME                             | 61  | 0.07 | 0.65 | 0.89  | 0.9466921 | 1 | 15936 |
| PEPTIDYL_TYROSINE_PHOSPHORYLATION    | 27  | 0.11 | 0.65 | 0.9   | 0.948657  | 1 | 8816  |
| ER_NUCLEAR_SIGNALING_PATHWAY         | 15  | 0.14 | 0.65 | 0.904 | 0.9466912 | 1 | 14370 |
| LYTIC_VACUOLE                        | 61  | 0.07 | 0.63 | 0.921 | 0.9556261 | 1 | 15936 |
| DNA_PACKAGING                        | 35  | 0.09 | 0.62 | 0.906 | 0.9627561 | 1 | 1498  |
| REGULATION_OF_PROTEIN_SECRETION      | 22  | 0.11 | 0.62 | 0.926 | 0.9651393 | 1 | 4565  |
| STEROID_HORMONE_RECEPTOR_SIGNALING   | 20  | 0.12 | 0.61 | 0.923 | 0.9677289 | 1 | 14193 |
| REGULATION_OF_ENDOCYTOSIS            | 16  | 0.13 | 0.61 | 0.915 | 0.9666479 | 1 | 15758 |
| POSITIVE_REGULATION_OF_CELL_CYCLE    | 15  | 0.13 | 0.61 | 0.928 | 0.9675875 | 1 | 15720 |
| CYTOSKELETON_DEPENDENT_INTRACELLULA  | 25  | 0.1  | 0.6  | 0.941 | 0.974062  | 1 | 3292  |
| OXIDOREDUCTASE_ACTIVITY_ACTING_ON_N  | 25  | 0.1  | 0.59 | 0.949 | 0.974438  | 1 | 4728  |
| SPHINGOLIPID_METABOLIC_PROCESS       | 29  | 0.09 | 0.58 | 0.961 | 0.9850537 | 1 | 8996  |
| CARBOHYDRATE_BIOSYNTHETIC_PROCESS    | 49  | 0.07 | 0.57 | 0.956 | 0.985245  | 1 | 6499  |
| CARBON_CARBON_LYASE_ACTIVITY         | 18  | 0.11 | 0.56 | 0.96  | 0.988933  | 1 | 11082 |
| EMBRYONIC_MORPHOGENESIS              | 17  | 0.11 | 0.55 | 0.966 | 0.9906001 | 1 | 3310  |
| INTEGRAL_TO_ENDOPLASMIC_RETICULUM_M  | 23  | 0.09 | 0.55 | 0.968 | 0.9901254 | 1 | 6951  |
| NEGATIVE_REGULATION_OF_CELL_ADHESIO  | 17  | 0.11 | 0.54 | 0.982 | 0.9921145 | 1 | 10779 |
| INTRINSIC_TO_ENDOPLASMIC_RETICULUM_M | 23  | 0.09 | 0.54 | 0.977 | 0.9923444 | 1 | 6951  |
| MAINTENANCE_OF_LOCALIZATION          | 22  | 0.09 | 0.52 | 0.99  | 0.9950578 | 1 | 16411 |
| PHOSPHOPROTEIN_PHOSPHATASE_ACTIVITY  | 79  | 0.05 | 0.52 | 0.988 | 0.9944938 | 1 | 12153 |
| OXIDOREDUCTASE_ACTIVITY_ACTING_ON_CH | 61  | 0.05 | 0.5  | 0.984 | 0.9981275 | 1 | 9095  |
| COPPER_ION_BINDING                   | 15  | 0.1  | 0.48 | 0.998 | 0.9987205 | 1 | 11397 |
| OXIDOREDUCTASE_ACTIVITY_GO_0016616   | 55  | 0.05 | 0.46 | 0.998 | 1         | 1 | 13540 |
| CELL_PROJECTION_PART                 | 19  | 0.09 | 0.45 | 0.996 | 0.9985749 | 1 | 6052  |
| ENDOSOME                             | 67  | 0.04 | 0.44 | 1     | 0.9977413 | 1 | 5936  |

**Table S3** | Gene Set Enrichment Analysis output for negative selection of essential genes in HUES62 hES cells after 14 additional days in culture. For the analysis, the *ALL Gene Ontology* set was used from the Molecular Signatures Database (MSigDB) with a minimum set size of 50 and max set size of 200.

| NAME                                  | SIZE | ES  | NES | NOMp  | FDRq     | FWERp | RANK AT MAX |
|---------------------------------------|------|-----|-----|-------|----------|-------|-------------|
| STRUCTURAL_CONSTITUENT_OF_RIBOSOME    | 76   | 0.3 | 3.2 | 0     | 0        | 0     | 3859        |
| CHROMOSOMAL_PART                      | 94   | 0.3 | 3.1 | 0     | 0        | 0     | 6631        |
| TRANSLATION                           | 171  | 0.2 | 3.1 | 0     | 0        | 0     | 6618        |
| KINETOCHORE                           | 24   | 0.5 | 2.9 | 0     | 9.40E-04 | 0.003 | 3761        |
| RNA_PROCESSING                        | 169  | 0.2 | 2.9 | 0     | 7.52E-04 | 0.003 | 5236        |
| RNA_SPLICING                          | 90   | 0.3 | 2.9 | 0     | 6.27E-04 | 0.003 | 4320        |
| RNA_POLYMERASE_ACTIVITY               | 15   | 0.6 | 2.8 | 0     | 7.19E-04 | 0.004 | 2256        |
| CHROMOSOME                            | 120  | 0.2 | 2.8 | 0     | 0.00141  | 0.009 | 5702        |
| RIBONUCLEOPROTEIN_COMPLEX             | 141  | 0.2 | 2.7 | 0     | 0.00208  | 0.015 | 4002        |
| ENDONUCLEASE_ACTIVITY                 | 25   | 0.4 | 2.6 | 0     | 0.00459  | 0.037 | 8117        |
| CHROMOSOMEPERICENTRIC_REGION          | 30   | 0.4 | 2.6 | 0     | 0.00584  | 0.052 | 3761        |
| SMALL_NUCLEAR_RIBONUCLEOPROTEIN_CC    | 22   | 0.4 | 2.5 | 0     | 0.01266  | 0.117 | 3794        |
| MRNA_METABOLIC_PROCESS                | 81   | 0.2 | 2.2 | 0     | 0.04974  | 0.403 | 5155        |
| MRNA_PROCESSING_GO_0006397            | 71   | 0.2 | 2.2 | 0     | 0.04785  | 0.414 | 4776        |
| RIBONUCLEASE_ACTIVITY                 | 25   | 0.4 | 2.2 | 0     | 0.04614  | 0.422 | 8287        |
| RIBONUCLEOPROTEIN_COMPLEX_BIOGENES    | 82   | 0.2 | 2.2 | 0     | 0.04803  | 0.451 | 7292        |
| DNA_REPLICATION                       | 99   | 0.2 | 2.2 | 0     | 0.04989  | 0.481 | 6509        |
| DENDRITE                              | 16   | 0.5 | 2.2 | 0     | 0.04712  | 0.481 | 9662        |
| NEGATIVE_REGULATION_OF_DNA_METABO     | 18   | 0.4 | 2.2 | 0.002 | 0.05343  | 0.542 | 5309        |
| SPINDLE_POLE                          | 18   | 0.4 | 2.2 | 0     | 0.0537   | 0.562 | 7479        |
| UBIQUITIN_CYCLE                       | 48   | 0.3 | 2.1 | 0     | 0.06029  | 0.637 | 6612        |
| BIOPOLYMER_CATABOLIC_PROCESS          | 113  | 0.2 | 2.1 | 0.002 | 0.06013  | 0.651 | 10475       |
| MICROTUBULE_ORGANIZING_CENTER         | 65   | 0.2 | 2.1 | 0.002 | 0.06211  | 0.684 | 9572        |
| NUCLEOLUS                             | 121  | 0.2 | 2.1 | 0.002 | 0.07798  | 0.778 | 3586        |
| SPLICEOSOME                           | 50   | 0.3 | 2.1 | 0.004 | 0.07747  | 0.789 | 3794        |
| PROTEIN_CATABOLIC_PROCESS             | 67   | 0.2 | 2.1 | 0.006 | 0.08273  | 0.821 | 6846        |
| MACROMOLECULE_CATABOLIC_PROCESS       | 131  | 0.2 | 2   | 0.006 | 0.08604  | 0.836 | 10475       |
| CENTROSOME                            | 56   | 0.2 | 2   | 0.006 | 0.08482  | 0.841 | 9426        |
| RNA_SPLICINGVIA_TRANSESTERIFICATION_R | 34   | 0.3 | 2   | 0.004 | 0.10577  | 0.915 | 4320        |
| PATTERN_BINDING                       | 45   | 0.2 | 2   | 0     | 0.10286  | 0.917 | 6020        |
| POSITIVE_REGULATION_OF_PHOSPHORYLAT   | 26   | 0.3 | 1.9 | 0.002 | 0.14238  | 0.967 | 7503        |
| MICROTUBULE_CYTOSKELETON              | 148  | 0.1 | 1.9 | 0.008 | 0.1459   | 0.97  | 9916        |
| RESPONSE_TO_HORMONE_STIMULUS          | 32   | 0.3 | 1.9 | 0.01  | 0.15685  | 0.981 | 7269        |
| REGULATION_OF_PHOSPHORYLATION         | 48   | 0.2 | 1.9 | 0.008 | 0.15934  | 0.985 | 8616        |
| NEGATIVE_REGULATION_OF_CELLULAR_BIO   | 29   | 0.3 | 1.9 | 0.019 | 0.17987  | 0.993 | 8483        |
| HEART_DEVELOPMENT                     | 36   | 0.3 | 1.9 | 0.006 | 0.17584  | 0.993 | 8825        |
| NUCLEOLAR_PART                        | 17   | 0.4 | 1.9 | 0.018 | 0.17614  | 0.993 | 8101        |
| DNA_DEPENDENT_DNA_REPLICATION         | 53   | 0.2 | 1.9 | 0.006 | 0.17392  | 0.994 | 6368        |
| POSITIVE_REGULATION_OF_PROTEIN_AMIN   | 20   | 0.3 | 1.9 | 0.01  | 0.17751  | 0.995 | 7503        |
| EMBRYONIC_DEVELOPMENT                 | 56   | 0.2 | 1.8 | 0.012 | 0.18565  | 0.997 | 9425        |
| PROTEIN_UBIQUITINATION                | 40   | 0.2 | 1.8 | 0.011 | 0.18796  | 0.997 | 6042        |
| PHAGOCYTOSIS                          | 16   | 0.4 | 1.8 | 0.004 | 0.18496  | 0.997 | 4338        |
| NUCLEOTIDYLTRANSFERASE_ACTIVITY       | 46   | 0.2 | 1.8 | 0.021 | 0.19598  | 0.997 | 2256        |
| HORMONE_RECEPTOR_BINDING              | 29   | 0.3 | 1.8 | 0.01  | 0.19662  | 0.998 | 9791        |
| NUCLEASE_ACTIVITY                     | 55   | 0.2 | 1.8 | 0.012 | 0.19249  | 0.998 | 8287        |
| BASAL_LAMINA                          | 21   | 0.3 | 1.8 | 0.017 | 0.19215  | 0.998 | 6036        |
| CHROMOSOME_SEGREGATION                | 32   | 0.3 | 1.8 | 0.013 | 0.2076   | 0.999 | 3761        |
| SPINDLE                               | 37   | 0.3 | 1.8 | 0.015 | 0.20624  | 0.999 | 8644        |
| MITOSIS                               | 81   | 0.2 | 1.8 | 0.02  | 0.20972  | 1     | 4967        |
| STRUCTURAL_CONSTITUENT_OF_MUSCLE      | 32   | 0.3 | 1.8 | 0.013 | 0.21334  | 1     | 11158       |
| DAMAGED_DNA_BINDING                   | 20   | 0.3 | 1.8 | 0.014 | 0.21846  | 1     | 7506        |
| M_PHASE_OF_MITOTIC_CELL_CYCLE         | 84   | 0.2 | 1.8 | 0.018 | 0.21511  | 1     | 4967        |
| NUCLEAR_HORMONE_RECEPTOR_BINDING      | 28   | 0.3 | 1.8 | 0.022 | 0.21215  | 1     | 9791        |
| OXIDOREDUCTASE_ACTIVITY_ACTING_ON_T   | 15   | 0.4 | 1.8 | 0.025 | 0.21138  | 1     | 7735        |
| PROTEIN_MODIFICATION_BY_SMALL_PROTE   | 43   | 0.2 | 1.8 | 0.03  | 0.22156  | 1     | 6042        |
| GUANYL_NUCLEOTIDE_EXCHANGE_FACTOR     | 46   | 0.2 | 1.7 | 0.022 | 0.21841  | 1     | 13024       |
| SMALL_CONJUGATING_PROTEIN_LIGASE_AC   | 51   | 0.2 | 1.7 | 0.021 | 0.21631  | 1     | 5497        |
| REGULATION_OF_MUSCLE_CONTRACTION      | 19   | 0.3 | 1.7 | 0.022 | 0.21511  | 1     | 11302       |
| POSITIVE_REGULATION_OF_PROTEIN_META   | 74   | 0.2 | 1.7 | 0.012 | 0.21577  | 1     | 7162        |
| REGULATION_OF_TRANSFERASE_ACTIVITY    | 155  | 0.1 | 1.7 | 0.04  | 0.2136   | 1     | 11602       |
| TRANSCRIPTION_FROM_RNA_POLYMERASE     | 19   | 0.3 | 1.7 | 0.024 | 0.21834  | 1     | 4493        |
| MITOTIC_CELL_CYCLE                    | 152  | 0.1 | 1.7 | 0.035 | 0.2149   | 1     | 4967        |
| PROTEIN_RNA_COMPLEX_ASSEMBLY          | 63   | 0.2 | 1.7 | 0.03  | 0.2164   | 1     | 7239        |
| RNA_POLYMERASE_COMPLEX                | 17   | 0.3 | 1.7 | 0.024 | 0.21365  | 1     | 2256        |
| DNA_DIRECTED_RNA_POLYMERASE_COMPL     | 17   | 0.3 | 1.7 | 0.036 | 0.21796  | 1     | 2256        |
| NEGATIVE_REGULATION_OF_BIOSYNTHETIC   | 30   | 0.3 | 1.7 | 0.02  | 0.2195   | 1     | 8483        |



|                                       |     |     |     |       |         |   |       |
|---------------------------------------|-----|-----|-----|-------|---------|---|-------|
| NUCLEAR_DNA_DIRECTED_RNA_POLYMERAS    | 17  | 0.3 | 1.7 | 0.019 | 0.21845 | 1 | 2256  |
| MITOTIC_SISTER_CHROMATID_SEGREGATIO   | 16  | 0.4 | 1.7 | 0.028 | 0.22184 | 1 | 3761  |
| GTP_BINDING                           | 43  | 0.2 | 1.7 | 0.025 | 0.21892 | 1 | 3196  |
| REPLICATION_FORK                      | 17  | 0.3 | 1.7 | 0.031 | 0.22204 | 1 | 9948  |
| TRANSLATION_INITIATION_FACTOR_ACTIVIT | 22  | 0.3 | 1.7 | 0.026 | 0.21986 | 1 | 9299  |
| DOUBLE_STRAND_BREAK_REPAIR            | 23  | 0.3 | 1.7 | 0.028 | 0.21749 | 1 | 6462  |
| REGULATION_OF_PROTEIN_KINASE_ACTIVIT  | 149 | 0.1 | 1.7 | 0.034 | 0.21502 | 1 | 11602 |
| MICROTUBULE_ORGANIZING_CENTER_PART    | 19  | 0.3 | 1.7 | 0.032 | 0.21365 | 1 | 9335  |
| SMALL_GTPASE_MEDIATED_SIGNAL_TRANSI   | 86  | 0.2 | 1.7 | 0.02  | 0.21254 | 1 | 11491 |
| REGULATION_OF_KINASE_ACTIVITY         | 151 | 0.1 | 1.7 | 0.025 | 0.21612 | 1 | 11602 |
| UBIQUITIN_PROTEIN_LIGASE_ACTIVITY     | 49  | 0.2 | 1.7 | 0.024 | 0.21416 | 1 | 5497  |
| SMALL_PROTEIN_CONJUGATING_ENZYME_A    | 52  | 0.2 | 1.7 | 0.025 | 0.21637 | 1 | 5497  |
| GUANYL_NUCLEOTIDE_BINDING             | 44  | 0.2 | 1.7 | 0.038 | 0.24144 | 1 | 3196  |
| POSITIVE_REGULATION_OF_PHOSPHATE_MI   | 28  | 0.3 | 1.7 | 0.043 | 0.24026 | 1 | 7503  |
| PROTEIN_FOLDING                       | 56  | 0.2 | 1.7 | 0.036 | 0.24292 | 1 | 4076  |
| CARBOHYDRATE_BINDING                  | 70  | 0.2 | 1.6 | 0.035 | 0.25783 | 1 | 6020  |
| MICROTUBULE_CYTOSKELETON_ORGANIZAT    | 33  | 0.2 | 1.6 | 0.04  | 0.25856 | 1 | 6113  |
| LIPID_TRANSPORT                       | 28  | 0.3 | 1.6 | 0.038 | 0.25897 | 1 | 12141 |
| DNA_INTEGRITY_CHECKPOINT              | 23  | 0.3 | 1.6 | 0.03  | 0.25667 | 1 | 5166  |
| TRANSLATION_REGULATOR_ACTIVITY        | 37  | 0.2 | 1.6 | 0.033 | 0.27763 | 1 | 9515  |
| LIGASE_ACTIVITY                       | 94  | 0.1 | 1.6 | 0.047 | 0.27909 | 1 | 5497  |
| HEPARIN_BINDING                       | 23  | 0.3 | 1.6 | 0.043 | 0.27788 | 1 | 5955  |
| REGULATION_OF_PROTEIN_METABOLIC_PRI   | 167 | 0.1 | 1.6 | 0.043 | 0.27482 | 1 | 7269  |
| POSITIVE_REGULATION_OF_CELLULAR_PROT  | 72  | 0.2 | 1.6 | 0.038 | 0.27409 | 1 | 7162  |
| INTEGRIN_COMPLEX                      | 19  | 0.3 | 1.6 | 0.04  | 0.27547 | 1 | 8862  |
| POLYSACCHARIDE_BINDING                | 36  | 0.2 | 1.6 | 0.037 | 0.27799 | 1 | 6020  |
| TRANSMISSION_OF_NERVE_IMPULSE         | 183 | 0.1 | 1.6 | 0.048 | 0.27746 | 1 | 11412 |
| RESPONSE_TO_ENDOGENOUS_STIMULUS       | 194 | 0.1 | 1.6 | 0.022 | 0.27466 | 1 | 6712  |
| OXIDOREDUCTASE_ACTIVITY_ACTING_ON_T   | 21  | 0.3 | 1.6 | 0.04  | 0.28801 | 1 | 7735  |
| CONTRACTILE_FIBER_PART                | 23  | 0.3 | 1.6 | 0.041 | 0.29314 | 1 | 11457 |
| SYNAPTIC_TRANSMISSION                 | 168 | 0.1 | 1.6 | 0.043 | 0.29093 | 1 | 11710 |
| SISTER_CHROMATID_SEGREGATION          | 17  | 0.3 | 1.6 | 0.065 | 0.2922  | 1 | 3761  |
| GLYCOSAMINOGLYCAN_BINDING             | 34  | 0.2 | 1.6 | 0.063 | 0.29084 | 1 | 6020  |
| CELLULAR_PROTEIN_CATABOLIC_PROCESS    | 57  | 0.2 | 1.6 | 0.049 | 0.28838 | 1 | 6327  |
| RAS_GUANYL_NUCLEOTIDE_EXCHANGE_FAC    | 19  | 0.3 | 1.6 | 0.047 | 0.29365 | 1 | 10881 |
| NEGATIVE_REGULATION_OF_TRANSLATION    | 23  | 0.3 | 1.6 | 0.056 | 0.31103 | 1 | 6953  |
| ATP_DEPENDENT_HELICASE_ACTIVITY       | 27  | 0.2 | 1.5 | 0.057 | 0.32931 | 1 | 2855  |
| COPPER_ION_BINDING                    | 15  | 0.3 | 1.5 | 0.067 | 0.32727 | 1 | 9758  |
| CELLULAR_MACROMOLECULE_CATABOLIC_F    | 100 | 0.1 | 1.5 | 0.048 | 0.32471 | 1 | 12464 |
| TRANSLATION_FACTOR_ACTIVITY_NUCLEIC_  | 35  | 0.2 | 1.5 | 0.059 | 0.32627 | 1 | 9515  |
| POSITIVE_REGULATION_OF_PROTEIN_MODI   | 29  | 0.2 | 1.5 | 0.065 | 0.33125 | 1 | 7503  |
| SMALL_GTPASE_REGULATOR_ACTIVITY       | 67  | 0.2 | 1.5 | 0.068 | 0.33907 | 1 | 13591 |
| REGULATION_OF_PROTEIN_AMINO_ACID_PI   | 30  | 0.2 | 1.5 | 0.075 | 0.34761 | 1 | 8455  |
| TRANSCRIPTION_ACTIVATOR_ACTIVITY      | 172 | 0.1 | 1.5 | 0.045 | 0.34691 | 1 | 9559  |
| M_PHASE                               | 113 | 0.1 | 1.5 | 0.072 | 0.34708 | 1 | 6114  |
| ACID_AMINO_ACID_LIGASE_ACTIVITY       | 57  | 0.2 | 1.5 | 0.084 | 0.36944 | 1 | 5497  |
| CYTOKINE_PRODUCTION                   | 72  | 0.2 | 1.5 | 0.081 | 0.36709 | 1 | 13356 |
| MICROTUBULE                           | 30  | 0.2 | 1.5 | 0.078 | 0.37229 | 1 | 8552  |
| SEQUENCE_SPECIFIC_DNA_BINDING         | 57  | 0.2 | 1.5 | 0.059 | 0.37065 | 1 | 11611 |
| REGULATION_OF_CELL_CYCLE              | 177 | 0.1 | 1.5 | 0.073 | 0.36903 | 1 | 3995  |
| THYROID_HORMONE_RECEPTOR_BINDING      | 17  | 0.3 | 1.5 | 0.075 | 0.37066 | 1 | 9448  |
| CONTRACTILE_FIBER                     | 25  | 0.2 | 1.5 | 0.065 | 0.37457 | 1 | 11457 |
| PROTEIN_DIMERIZATION_ACTIVITY         | 178 | 0.1 | 1.5 | 0.075 | 0.37188 | 1 | 10558 |
| REGULATION_OF_DNA_METABOLIC_PROCES    | 45  | 0.2 | 1.5 | 0.078 | 0.37703 | 1 | 6709  |
| LIGASE_ACTIVITY_FORMING_CARBON_NITRI  | 67  | 0.2 | 1.5 | 0.086 | 0.39831 | 1 | 13750 |
| MEDIATOR_COMPLEX                      | 18  | 0.3 | 1.5 | 0.087 | 0.3967  | 1 | 7899  |
| REGULATED_SECRETORY_PATHWAY           | 15  | 0.3 | 1.5 | 0.086 | 0.3938  | 1 | 8732  |
| EXTRACELLULAR_LIGAND_GATED_ION_CHAI   | 22  | 0.3 | 1.5 | 0.088 | 0.39176 | 1 | 11688 |
| INORGANIC_ANION_TRANSPORT             | 18  | 0.3 | 1.5 | 0.081 | 0.39574 | 1 | 10957 |
| RRNA_METABOLIC_PROCESS                | 16  | 0.3 | 1.4 | 0.089 | 0.40759 | 1 | 8117  |
| REGULATION_OF_ANGIOGENESIS            | 26  | 0.2 | 1.4 | 0.086 | 0.4061  | 1 | 10381 |
| DEOXYRIBONUCLEASE_ACTIVITY            | 22  | 0.3 | 1.4 | 0.11  | 0.41665 | 1 | 10991 |
| DNA_DIRECTED_RNA_POLYMERASEII_HOLOI   | 66  | 0.1 | 1.4 | 0.082 | 0.42062 | 1 | 2256  |
| CONDENSED_CHROMOSOME                  | 33  | 0.2 | 1.4 | 0.084 | 0.4268  | 1 | 6080  |
| SPLICEOSOME_ASSEMBLY                  | 21  | 0.3 | 1.4 | 0.102 | 0.4237  | 1 | 3073  |
| REGULATION_OF_TRANSLATION             | 90  | 0.1 | 1.4 | 0.075 | 0.42146 | 1 | 6953  |
| NUCLEAR_CHROMOSOME_PART               | 33  | 0.2 | 1.4 | 0.108 | 0.42265 | 1 | 6085  |
| EXCITATORY_EXTRACELLULAR_LIGAND_GATI  | 21  | 0.3 | 1.4 | 0.102 | 0.41963 | 1 | 11688 |
| RESPONSE_TO_UV                        | 25  | 0.2 | 1.4 | 0.112 | 0.41962 | 1 | 6509  |
| CELL_CYCLE_PHASE                      | 169 | 0.1 | 1.4 | 0.075 | 0.41901 | 1 | 6114  |
| INTERACTION_WITH_HOST                 | 17  | 0.3 | 1.4 | 0.101 | 0.41987 | 1 | 9746  |

|                                      |     |     |     |       |         |   |       |
|--------------------------------------|-----|-----|-----|-------|---------|---|-------|
| MITOCHONDRIAL_PART                   | 138 | 0.1 | 1.4 | 0.099 | 0.41691 | 1 | 10078 |
| LIPID_HOMEOSTASIS                    | 15  | 0.3 | 1.4 | 0.112 | 0.42099 | 1 | 11357 |
| GROWTH_FACTOR_ACTIVITY               | 52  | 0.2 | 1.4 | 0.103 | 0.41814 | 1 | 9943  |
| PROTEIN_C_TERMINUS_BINDING           | 70  | 0.1 | 1.4 | 0.089 | 0.42263 | 1 | 11598 |
| ACTIN_FILAMENT_BASED_PROCESS         | 113 | 0.1 | 1.4 | 0.094 | 0.42559 | 1 | 9015  |
| OXYGEN_AND_REACTIVE_OXYGEN_SPECIES_  | 20  | 0.3 | 1.4 | 0.12  | 0.42292 | 1 | 9758  |
| STEROID_HORMONE_RECEPTOR_SIGNALING   | 20  | 0.3 | 1.4 | 0.11  | 0.42807 | 1 | 3365  |
| ORGANELLE_INNER_MEMBRANE             | 72  | 0.1 | 1.4 | 0.106 | 0.45011 | 1 | 10063 |
| ORGANELLE_LOCALIZATION               | 24  | 0.2 | 1.4 | 0.124 | 0.44814 | 1 | 6325  |
| APOPTOTIC_PROGRAM                    | 58  | 0.2 | 1.4 | 0.113 | 0.44969 | 1 | 10241 |
| PROTEIN_HOMODIMERIZATION_ACTIVITY    | 118 | 0.1 | 1.4 | 0.12  | 0.45711 | 1 | 11861 |
| TRANSCRIPTION_REPRESSOR_ACTIVITY     | 147 | 0.1 | 1.4 | 0.12  | 0.46068 | 1 | 7709  |
| CENTRAL_NERVOUS_SYSTEM_DEVELOPMEN    | 121 | 0.1 | 1.4 | 0.117 | 0.45862 | 1 | 10198 |
| EXCRETION                            | 36  | 0.2 | 1.4 | 0.113 | 0.47181 | 1 | 13091 |
| POSITIVE_REGULATION_OF_CELLULAR_COM  | 34  | 0.2 | 1.4 | 0.132 | 0.4797  | 1 | 10253 |
| TRANSCRIPTION_COREPRESSOR_ACTIVITY   | 89  | 0.1 | 1.4 | 0.119 | 0.48185 | 1 | 7709  |
| CELL_SUBSTRATE_ADHESION              | 38  | 0.2 | 1.4 | 0.118 | 0.48259 | 1 | 10434 |
| ACTIN_CYTOSKELETON_ORGANIZATION_ANI  | 103 | 0.1 | 1.4 | 0.156 | 0.48095 | 1 | 9015  |
| REGULATION_OF_CELLULAR_PROTEIN_MET/  | 157 | 0.1 | 1.3 | 0.114 | 0.48962 | 1 | 7269  |
| MAINTENANCE_OF_LOCALIZATION          | 22  | 0.2 | 1.3 | 0.14  | 0.49435 | 1 | 10410 |
| SUGAR_BINDING                        | 32  | 0.2 | 1.3 | 0.141 | 0.49252 | 1 | 4815  |
| RESPONSE_TO_ORGANIC_SUBSTANCE        | 29  | 0.2 | 1.3 | 0.139 | 0.49164 | 1 | 11861 |
| RESPONSE_TO_BACTERIUM                | 29  | 0.2 | 1.3 | 0.143 | 0.49544 | 1 | 9231  |
| CELL_MATURATION                      | 16  | 0.3 | 1.3 | 0.13  | 0.49614 | 1 | 6257  |
| INTRACELLULAR_RECEPTOR_MEDIATED_SIG  | 21  | 0.2 | 1.3 | 0.155 | 0.49335 | 1 | 3365  |
| CHROMATIN                            | 35  | 0.2 | 1.3 | 0.16  | 0.49924 | 1 | 6463  |
| ISOMERASE_ACTIVITY                   | 35  | 0.2 | 1.3 | 0.151 | 0.5049  | 1 | 11648 |
| MOTOR_ACTIVITY                       | 27  | 0.2 | 1.3 | 0.136 | 0.51497 | 1 | 9498  |
| RAS_PROTEIN_SIGNAL_TRANSDUCTION      | 65  | 0.1 | 1.3 | 0.139 | 0.5177  | 1 | 11457 |
| GTPASE_REGULATOR_ACTIVITY            | 123 | 0.1 | 1.3 | 0.156 | 0.51778 | 1 | 10421 |
| REGULATION_OF_DNA_REPLICATION        | 20  | 0.2 | 1.3 | 0.155 | 0.52449 | 1 | 6368  |
| VITAMIN_METABOLIC_PROCESS            | 17  | 0.3 | 1.3 | 0.163 | 0.53823 | 1 | 6955  |
| CELL_MATRIX_ADHESION                 | 37  | 0.2 | 1.3 | 0.149 | 0.54069 | 1 | 10434 |
| RRNA_PROCESSING                      | 15  | 0.3 | 1.3 | 0.189 | 0.54188 | 1 | 4442  |
| RIBOSOME                             | 39  | 0.2 | 1.3 | 0.151 | 0.53915 | 1 | 3769  |
| REGULATION_OF_CYTOKINE_PRODUCTION    | 24  | 0.2 | 1.3 | 0.167 | 0.5363  | 1 | 13356 |
| INTRAMOLECULAR_OXIDOREDUCTASE_ACTI'  | 19  | 0.3 | 1.3 | 0.171 | 0.53496 | 1 | 11648 |
| TRANSMEMBRANE_RECEPTOR_PROTEIN_TYI   | 42  | 0.2 | 1.3 | 0.151 | 0.53692 | 1 | 9016  |
| MICROTUBULE_MOTOR_ACTIVITY           | 15  | 0.3 | 1.3 | 0.169 | 0.53437 | 1 | 9438  |
| LYMPHOCYTE_ACTIVATION                | 59  | 0.1 | 1.3 | 0.159 | 0.53606 | 1 | 13078 |
| TRANSCRIPTION_COACTIVATOR_ACTIVITY   | 122 | 0.1 | 1.3 | 0.15  | 0.53985 | 1 | 9791  |
| REGULATION_OF_BLOOD_PRESSURE         | 22  | 0.2 | 1.3 | 0.166 | 0.54833 | 1 | 8163  |
| REGULATION_OF_HYDROLASE_ACTIVITY     | 78  | 0.1 | 1.3 | 0.167 | 0.54615 | 1 | 13329 |
| EMBRYONIC_MORPHOGENESIS              | 17  | 0.3 | 1.3 | 0.195 | 0.54896 | 1 | 9174  |
| PHOSPHOINOSITIDE_BINDING             | 19  | 0.2 | 1.3 | 0.178 | 0.54714 | 1 | 12743 |
| DNA_REPAIR                           | 122 | 0.1 | 1.3 | 0.17  | 0.54761 | 1 | 6654  |
| HELICASE_ACTIVITY                    | 50  | 0.2 | 1.3 | 0.178 | 0.54581 | 1 | 7005  |
| LIPID_RAFT                           | 27  | 0.2 | 1.3 | 0.176 | 0.54598 | 1 | 11027 |
| NEGATIVE_REGULATION_OF_TRANSFERASE_  | 35  | 0.2 | 1.3 | 0.193 | 0.54404 | 1 | 10661 |
| RNA_HELICASE_ACTIVITY                | 24  | 0.2 | 1.3 | 0.181 | 0.54428 | 1 | 2855  |
| ANION_TRANSPORT                      | 31  | 0.2 | 1.3 | 0.183 | 0.54349 | 1 | 11166 |
| CYTOPLASMIC_VESICLE                  | 114 | 0.1 | 1.3 | 0.179 | 0.54119 | 1 | 10038 |
| NUCLEAR_CHROMOSOME                   | 52  | 0.1 | 1.3 | 0.17  | 0.54536 | 1 | 6085  |
| REGULATION_OF_ACTION_POTENTIAL       | 17  | 0.3 | 1.3 | 0.176 | 0.56191 | 1 | 1754  |
| ANATOMICAL_STRUCTURE_FORMATION       | 55  | 0.1 | 1.3 | 0.186 | 0.56051 | 1 | 10542 |
| CELL_CYCLE_PROCESS                   | 191 | 0.1 | 1.3 | 0.186 | 0.56693 | 1 | 6014  |
| TRANSITION_METAL_ION_BINDING         | 107 | 0.1 | 1.3 | 0.191 | 0.56557 | 1 | 13690 |
| PROTEIN_TYROSINE_KINASE_ACTIVITY     | 62  | 0.1 | 1.3 | 0.18  | 0.56271 | 1 | 9543  |
| REGULATION_OF_CYTOKINE_BIOSYNTHETIC_ | 38  | 0.2 | 1.3 | 0.198 | 0.5627  | 1 | 6893  |
| ATPASE_ACTIVITY_COUPLED              | 93  | 0.1 | 1.2 | 0.18  | 0.56397 | 1 | 9451  |
| ESTABLISHMENT_OF_ORGANELLE_LOCALIZA  | 18  | 0.2 | 1.2 | 0.189 | 0.56168 | 1 | 2669  |
| RESPONSE_TO_DNA_DAMAGE_STIMULUS      | 158 | 0.1 | 1.2 | 0.179 | 0.55953 | 1 | 6712  |
| PROTEIN_IMPORT                       | 62  | 0.1 | 1.2 | 0.205 | 0.56057 | 1 | 13349 |
| ENZYME_BINDING                       | 174 | 0.1 | 1.2 | 0.201 | 0.55886 | 1 | 13081 |
| MITOCHONDRIAL_INNER_MEMBRANE         | 64  | 0.1 | 1.2 | 0.186 | 0.56755 | 1 | 10063 |
| NUCLEAR_ENVELOPE                     | 72  | 0.1 | 1.2 | 0.199 | 0.56755 | 1 | 4008  |
| LIPID_TRANSPORTER_ACTIVITY           | 28  | 0.2 | 1.2 | 0.208 | 0.56483 | 1 | 10650 |
| REGULATION_OF_CELLULAR_COMPONENT_I   | 118 | 0.1 | 1.2 | 0.199 | 0.56739 | 1 | 10654 |
| ATP_DEPENDENT_RNA_HELICASE_ACTIVITY  | 17  | 0.3 | 1.2 | 0.23  | 0.57018 | 1 | 2855  |
| ZINC_ION_BINDING                     | 86  | 0.1 | 1.2 | 0.193 | 0.56991 | 1 | 11821 |
| PROTEOGLYCAN_METABOLIC_PROCESS       | 21  | 0.2 | 1.2 | 0.19  | 0.56927 | 1 | 3735  |

|                                       |     |     |     |       |         |   |       |
|---------------------------------------|-----|-----|-----|-------|---------|---|-------|
| RESPONSE_TO_TEMPERATURE_STIMULUS      | 15  | 0.3 | 1.2 | 0.197 | 0.56757 | 1 | 3602  |
| PROTEIN_PROCESSING                    | 48  | 0.2 | 1.2 | 0.189 | 0.56552 | 1 | 10472 |
| REGULATION_OF_MAP_KINASE_ACTIVITY     | 62  | 0.1 | 1.2 | 0.192 | 0.56695 | 1 | 10421 |
| ENDOSOME_TRANSPORT                    | 23  | 0.2 | 1.2 | 0.217 | 0.57509 | 1 | 12627 |
| PROTEIN_AMINO_ACID_N_LINKED_GLYCOSY   | 30  | 0.2 | 1.2 | 0.221 | 0.57686 | 1 | 5633  |
| MITOCHONDRIAL_MEMBRANE_PART           | 50  | 0.1 | 1.2 | 0.217 | 0.57692 | 1 | 10063 |
| MICROTUBULE_ORGANIZING_CENTER_ORG/    | 15  | 0.3 | 1.2 | 0.221 | 0.5756  | 1 | 7479  |
| REGULATION_OF_CATABOLIC_PROCESS       | 16  | 0.3 | 1.2 | 0.218 | 0.57311 | 1 | 12392 |
| COATED_VESICLE_MEMBRANE               | 15  | 0.3 | 1.2 | 0.229 | 0.57254 | 1 | 10969 |
| SINGLE_STRANDED_DNA_BINDING           | 33  | 0.2 | 1.2 | 0.221 | 0.57211 | 1 | 5562  |
| CYTOPLASMIC_MEMBRANE_BOUND_VESICL     | 110 | 0.1 | 1.2 | 0.228 | 0.57529 | 1 | 10038 |
| CELL_CYCLE_CHECKPOINT_GO_0000075      | 47  | 0.1 | 1.2 | 0.222 | 0.5844  | 1 | 3464  |
| VIRAL_REPRODUCTIVE_PROCESS            | 36  | 0.2 | 1.2 | 0.234 | 0.58369 | 1 | 9979  |
| CALCIUM_ION_BINDING                   | 101 | 0.1 | 1.2 | 0.232 | 0.58318 | 1 | 13335 |
| DNA_DAMAGE_CHECKPOINT                 | 19  | 0.2 | 1.2 | 0.22  | 0.58095 | 1 | 3464  |
| VIRAL_INFECTIOUS_CYCLE                | 32  | 0.2 | 1.2 | 0.229 | 0.58049 | 1 | 11514 |
| NEURON_APOPTOSIS                      | 17  | 0.2 | 1.2 | 0.228 | 0.58144 | 1 | 9489  |
| PROTEIN_N_TERMINUS_BINDING            | 37  | 0.2 | 1.2 | 0.237 | 0.5828  | 1 | 7789  |
| REGULATION_OF_PROTEIN_MODIFICATION_   | 44  | 0.2 | 1.2 | 0.24  | 0.58946 | 1 | 7503  |
| CARBOHYDRATE_CATABOLIC_PROCESS        | 22  | 0.2 | 1.2 | 0.226 | 0.59103 | 1 | 13394 |
| MRNA_BINDING                          | 22  | 0.2 | 1.2 | 0.255 | 0.6017  | 1 | 11793 |
| MITOCHONDRIAL_MEMBRANE                | 82  | 0.1 | 1.2 | 0.254 | 0.60163 | 1 | 10063 |
| RNA_DEPENDENT_ATPASE_ACTIVITY         | 18  | 0.2 | 1.2 | 0.265 | 0.59908 | 1 | 2855  |
| RNA_POLYMERASE_II_TRANSCRIPTION_FAC   | 181 | 0.1 | 1.2 | 0.255 | 0.61099 | 1 | 4714  |
| COFACTOR_BINDING                      | 22  | 0.2 | 1.2 | 0.262 | 0.60896 | 1 | 12648 |
| CELLULAR_RESPONSE_TO_STIMULUS         | 18  | 0.2 | 1.2 | 0.247 | 0.61    | 1 | 4897  |
| GTPASE_BINDING                        | 34  | 0.2 | 1.2 | 0.274 | 0.60986 | 1 | 13432 |
| INOSITOL_OR_PHOSPHATIDYLINOSITOL_KIN  | 18  | 0.2 | 1.2 | 0.237 | 0.61108 | 1 | 8911  |
| SECRETION                             | 175 | 0.1 | 1.2 | 0.248 | 0.60985 | 1 | 11766 |
| FEEDING_BEHAVIOR                      | 24  | 0.2 | 1.2 | 0.287 | 0.61331 | 1 | 13026 |
| CELLULAR_CARBOHYDRATE_CATABOLIC_PRC   | 21  | 0.2 | 1.2 | 0.262 | 0.61197 | 1 | 13394 |
| TRANSCRIPTION_INITIATION              | 35  | 0.2 | 1.2 | 0.256 | 0.62134 | 1 | 4203  |
| NEGATIVE_REGULATION_OF_CATALYTIC_AC   | 69  | 0.1 | 1.2 | 0.249 | 0.61908 | 1 | 10661 |
| ORGANELLE_ENVELOPE                    | 164 | 0.1 | 1.2 | 0.257 | 0.61992 | 1 | 10078 |
| ACETYLCHOLINE_BINDING                 | 17  | 0.2 | 1.2 | 0.266 | 0.61762 | 1 | 10613 |
| ACTIN_BINDING                         | 76  | 0.1 | 1.2 | 0.271 | 0.61652 | 1 | 9547  |
| EXTRINSIC_TO_MEMBRANE                 | 24  | 0.2 | 1.2 | 0.263 | 0.61628 | 1 | 10795 |
| MITOCHONDRION_ORGANIZATION_AND_BI     | 46  | 0.1 | 1.2 | 0.267 | 0.61634 | 1 | 10720 |
| PROTEIN_AUTOPROCESSING                | 31  | 0.2 | 1.2 | 0.256 | 0.61515 | 1 | 10242 |
| DEFENSE_RESPONSE_TO_BACTERIUM         | 24  | 0.2 | 1.2 | 0.261 | 0.61597 | 1 | 9231  |
| DNA_CATABOLIC_PROCESS                 | 22  | 0.2 | 1.2 | 0.258 | 0.61696 | 1 | 10241 |
| RNA_SPLICING_FACTOR_ACTIVITYTRANSESTI | 19  | 0.2 | 1.2 | 0.279 | 0.61611 | 1 | 3630  |
| REGULATION_OF_GTPASE_ACTIVITY         | 15  | 0.2 | 1.2 | 0.258 | 0.61533 | 1 | 11305 |
| RECEPTOR_COMPLEX                      | 55  | 0.1 | 1.2 | 0.262 | 0.62206 | 1 | 11772 |
| CHROMOSOME_ORGANIZATION_AND_BIOG      | 124 | 0.1 | 1.1 | 0.283 | 0.62595 | 1 | 8322  |
| NEGATIVE_REGULATION_OF_CELL_PROLIFEF  | 153 | 0.1 | 1.1 | 0.258 | 0.62375 | 1 | 8852  |
| ATPASE_ACTIVITY                       | 112 | 0.1 | 1.1 | 0.264 | 0.62767 | 1 | 9288  |
| COATED_MEMBRANE                       | 15  | 0.2 | 1.1 | 0.268 | 0.63037 | 1 | 10007 |
| ENVELOPE                              | 164 | 0.1 | 1.1 | 0.262 | 0.62853 | 1 | 10078 |
| MICROTUBULE_BASED_PROCESS             | 79  | 0.1 | 1.1 | 0.27  | 0.62648 | 1 | 10166 |
| PROTEIN_IMPORT_INTO_NUCLEUS           | 48  | 0.1 | 1.1 | 0.252 | 0.62535 | 1 | 13349 |
| AMINE_BINDING                         | 23  | 0.2 | 1.1 | 0.291 | 0.63409 | 1 | 10613 |
| RIBOSOME_BIOGENESIS_AND_ASSEMBLY      | 17  | 0.2 | 1.1 | 0.282 | 0.6332  | 1 | 3361  |
| MITOCHONDRIAL_LUMEN                   | 46  | 0.1 | 1.1 | 0.279 | 0.63323 | 1 | 10077 |
| NUCLEAR_IMPORT                        | 49  | 0.1 | 1.1 | 0.29  | 0.63405 | 1 | 13349 |
| CYTOPLASM_ORGANIZATION_AND_BIOGENI    | 15  | 0.2 | 1.1 | 0.306 | 0.63296 | 1 | 11290 |
| SMALL_GTPASE_BINDING                  | 33  | 0.2 | 1.1 | 0.298 | 0.63466 | 1 | 13432 |
| MITOCHONDRIAL_MATRIX                  | 46  | 0.1 | 1.1 | 0.292 | 0.64541 | 1 | 10077 |
| ANGIOGENESIS                          | 47  | 0.1 | 1.1 | 0.306 | 0.64405 | 1 | 10542 |
| MICROTUBULE_BINDING                   | 31  | 0.2 | 1.1 | 0.301 | 0.65093 | 1 | 13850 |
| RESPONSE_TO_DRUG                      | 20  | 0.2 | 1.1 | 0.313 | 0.65551 | 1 | 8890  |
| MEMBRANE_COAT                         | 15  | 0.2 | 1.1 | 0.308 | 0.66618 | 1 | 10007 |
| TUBULIN_BINDING                       | 45  | 0.1 | 1.1 | 0.288 | 0.66384 | 1 | 13965 |
| SPHINGOLIPID_METABOLIC_PROCESS        | 29  | 0.2 | 1.1 | 0.308 | 0.6616  | 1 | 4872  |
| CELL_ACTIVATION                       | 74  | 0.1 | 1.1 | 0.314 | 0.66419 | 1 | 13186 |
| REGULATION_OF_CYCLIN_DEPENDENT_PRO    | 42  | 0.1 | 1.1 | 0.295 | 0.6642  | 1 | 11593 |
| VIRAL_REPRODUCTION                    | 41  | 0.1 | 1.1 | 0.325 | 0.6666  | 1 | 12362 |
| KINASE_BINDING                        | 68  | 0.1 | 1.1 | 0.317 | 0.66587 | 1 | 7270  |
| TRANSLATIONAL_INITIATION              | 36  | 0.2 | 1.1 | 0.315 | 0.66583 | 1 | 6263  |
| POSITIVE_REGULATION_OF_NUCLEOBASENL   | 154 | 0.1 | 1.1 | 0.321 | 0.66438 | 1 | 6743  |
| NEGATIVE_REGULATION_OF_DEVELOPMENT    | 196 | 0.1 | 1.1 | 0.338 | 0.66558 | 1 | 10974 |

|                                       |     |     |     |       |         |   |       |
|---------------------------------------|-----|-----|-----|-------|---------|---|-------|
| MYOSIN_COMPLEX                        | 16  | 0.2 | 1.1 | 0.307 | 0.66468 | 1 | 1552  |
| POSITIVE_REGULATION_OF_CELL_CYCLE     | 15  | 0.2 | 1.1 | 0.326 | 0.66924 | 1 | 4220  |
| CYTOKINE_METABOLIC_PROCESS            | 42  | 0.1 | 1.1 | 0.334 | 0.6679  | 1 | 6893  |
| REGULATION_OF_SMALL_GTPASE_MEDIATE    | 23  | 0.2 | 1.1 | 0.325 | 0.67422 | 1 | 11457 |
| PROTEIN_AMINO_ACID_AUTOPHOSPHORYL     | 30  | 0.2 | 1.1 | 0.335 | 0.67479 | 1 | 10242 |
| RESPONSE_TO_OTHER_ORGANISM            | 79  | 0.1 | 1.1 | 0.346 | 0.67616 | 1 | 11656 |
| VESICLE_MEDIATED_TRANSPORT            | 189 | 0.1 | 1.1 | 0.33  | 0.6756  | 1 | 11757 |
| PROTEIN_KINASE_REGULATOR_ACTIVITY     | 37  | 0.2 | 1.1 | 0.333 | 0.67858 | 1 | 10940 |
| HUMORAL_IMMUNE_RESPONSE               | 31  | 0.2 | 1.1 | 0.339 | 0.67909 | 1 | 8759  |
| MEMBRANE_BOUND_VESICLE                | 112 | 0.1 | 1.1 | 0.341 | 0.68211 | 1 | 10038 |
| LEUKOCYTE_ACTIVATION                  | 67  | 0.1 | 1.1 | 0.348 | 0.68296 | 1 | 13078 |
| MYOFIBRIL                             | 19  | 0.2 | 1.1 | 0.341 | 0.68065 | 1 | 11457 |
| DNA_DAMAGE_RESPONSESIGNAL_TRANSDU     | 34  | 0.2 | 1.1 | 0.357 | 0.68062 | 1 | 5166  |
| AUXILIARY_TRANSPORT_PROTEIN_ACTIVITY  | 25  | 0.2 | 1.1 | 0.371 | 0.68665 | 1 | 10497 |
| COENZYME_BINDING                      | 16  | 0.2 | 1.1 | 0.355 | 0.68682 | 1 | 11823 |
| NEURON_PROJECTION                     | 20  | 0.2 | 1.1 | 0.338 | 0.68529 | 1 | 10028 |
| PROTEIN_COMPLEX_ASSEMBLY              | 162 | 0.1 | 1.1 | 0.345 | 0.68581 | 1 | 8750  |
| POSITIVE_REGULATION_OF_CATALYTIC_ACT  | 159 | 0.1 | 1.1 | 0.355 | 0.68629 | 1 | 13576 |
| APOPTOTIC_NUCLEAR_CHANGES             | 18  | 0.2 | 1.1 | 0.34  | 0.68816 | 1 | 10241 |
| VASCULATURE_DEVELOPMENT               | 54  | 0.1 | 1.1 | 0.347 | 0.68621 | 1 | 10542 |
| DEVELOPMENTAL_MATURATION              | 18  | 0.2 | 1.1 | 0.372 | 0.6904  | 1 | 6257  |
| INDUCTION_OF_APOPTOSIS_BY_EXTRACELLU  | 25  | 0.2 | 1.1 | 0.355 | 0.69038 | 1 | 5460  |
| BRAIN_DEVELOPMENT                     | 51  | 0.1 | 1.1 | 0.369 | 0.69056 | 1 | 12286 |
| AMINE_RECEPTOR_ACTIVITY               | 34  | 0.2 | 1.1 | 0.357 | 0.69454 | 1 | 13192 |
| CONDENSED_NUCLEAR_CHROMOSOME          | 18  | 0.2 | 1.1 | 0.37  | 0.69568 | 1 | 11251 |
| CYTOKINE_SECRETION                    | 18  | 0.2 | 1.1 | 0.369 | 0.70222 | 1 | 13329 |
| ANTIGEN_BINDING                       | 22  | 0.2 | 1   | 0.374 | 0.71906 | 1 | 11455 |
| ORGANELLE_OUTER_MEMBRANE              | 23  | 0.2 | 1   | 0.388 | 0.71905 | 1 | 3826  |
| MICROTUBULE_ASSOCIATED_COMPLEX        | 46  | 0.1 | 1   | 0.387 | 0.72054 | 1 | 15350 |
| NUCLEAR_MEMBRANE_PART                 | 42  | 0.1 | 1   | 0.378 | 0.72272 | 1 | 9992  |
| PHOSPHOINOSITIDE_METABOLIC_PROCESS    | 30  | 0.2 | 1   | 0.375 | 0.72421 | 1 | 1358  |
| POSITIVE_REGULATION_OF_TRANSLATION    | 34  | 0.1 | 1   | 0.382 | 0.73133 | 1 | 6893  |
| MITOCHONDRIAL_OUTER_MEMBRANE          | 17  | 0.2 | 1   | 0.398 | 0.73579 | 1 | 2571  |
| NEGATIVE_REGULATION_OF_CELL_ADHESIO   | 17  | 0.2 | 1   | 0.41  | 0.74311 | 1 | 3653  |
| BASEMENT_MEMBRANE                     | 37  | 0.1 | 1   | 0.413 | 0.74309 | 1 | 8644  |
| RIBOSOMAL_SUBUNIT                     | 20  | 0.2 | 1   | 0.422 | 0.74111 | 1 | 10077 |
| REGULATION_OF_HEART_CONTRACTION       | 25  | 0.2 | 1   | 0.4   | 0.73908 | 1 | 8489  |
| ANTI_APOPTOSIS                        | 117 | 0.1 | 1   | 0.425 | 0.73689 | 1 | 10921 |
| NEGATIVE_REGULATION_OF_MAP_KINASE_    | 17  | 0.2 | 1   | 0.444 | 0.74404 | 1 | 13312 |
| NUCLEAR_ORGANIZATION_AND_BIOGENESI    | 29  | 0.2 | 1   | 0.435 | 0.74712 | 1 | 10241 |
| REGULATION_OF_LYMPHOCYTE_ACTIVATIO    | 34  | 0.1 | 1   | 0.419 | 0.7503  | 1 | 7478  |
| CYTOKINE_AND_CHEMOKINE_MEDIATED_SI    | 22  | 0.2 | 1   | 0.447 | 0.75125 | 1 | 5849  |
| MITOCHONDRIAL_ENVELOPE                | 93  | 0.1 | 1   | 0.428 | 0.75097 | 1 | 10078 |
| VACUOLE                               | 69  | 0.1 | 1   | 0.436 | 0.75789 | 1 | 10703 |
| POSITIVE_REGULATION_OF_TRANSFERASE_   | 81  | 0.1 | 1   | 0.453 | 0.76068 | 1 | 12339 |
| CYTOKINE_BIOSYNTHETIC_PROCESS         | 41  | 0.1 | 1   | 0.405 | 0.76078 | 1 | 6893  |
| DNA_DEPENDENT_ATPASE_ACTIVITY         | 22  | 0.2 | 1   | 0.438 | 0.75894 | 1 | 9171  |
| POSITIVE_REGULATION_OF_TRANSCRIPTION  | 144 | 0.1 | 1   | 0.44  | 0.76167 | 1 | 6743  |
| SH2_DOMAIN_BINDING                    | 15  | 0.2 | 1   | 0.417 | 0.76607 | 1 | 13015 |
| DETECTION_OF_EXTERNAL_STIMULUS        | 21  | 0.2 | 1   | 0.422 | 0.76742 | 1 | 14811 |
| MUSCLE_CELL_DIFFERENTIATION           | 22  | 0.2 | 1   | 0.431 | 0.77142 | 1 | 11551 |
| PEROXISOME_ORGANIZATION_AND_BIOGEN    | 16  | 0.2 | 1   | 0.446 | 0.77182 | 1 | 9723  |
| NUCLEAR_PORE                          | 31  | 0.2 | 1   | 0.427 | 0.7764  | 1 | 13031 |
| MEIOTIC_CELL_CYCLE                    | 35  | 0.1 | 1   | 0.416 | 0.77635 | 1 | 6723  |
| CAMP_MEDIATED_SIGNALING               | 65  | 0.1 | 1   | 0.476 | 0.78161 | 1 | 13688 |
| TRANSCRIPTION_INITIATION_FROM_RNA_PC  | 29  | 0.2 | 1   | 0.47  | 0.78971 | 1 | 4111  |
| MONOVALENT_INORGANIC_CATION_TRANS     | 33  | 0.1 | 1   | 0.465 | 0.78991 | 1 | 3445  |
| SPECIFIC_RNA_POLYMERASE_II_TRANSCRIPT | 35  | 0.1 | 1   | 0.444 | 0.79534 | 1 | 6280  |
| GLYCEROPHOSPHOLIPID_METABOLIC_PROCI   | 45  | 0.1 | 1   | 0.457 | 0.80076 | 1 | 1358  |
| G_PROTEIN_SIGNALING_COUPLED_TO_CAM    | 64  | 0.1 | 1   | 0.474 | 0.80029 | 1 | 13688 |
| NEGATIVE_REGULATION_OF_PROGRAMME      | 150 | 0.1 | 1   | 0.473 | 0.80073 | 1 | 7925  |
| PORE_COMPLEX                          | 36  | 0.1 | 1   | 0.482 | 0.80869 | 1 | 13108 |
| REGULATION_OF_MULTICELLULAR_ORGANI    | 149 | 0.1 | 1   | 0.449 | 0.80644 | 1 | 13934 |
| AEROBIC_RESPIRATION                   | 15  | 0.2 | 1   | 0.489 | 0.80664 | 1 | 14345 |
| CHROMATIN_BINDING                     | 32  | 0.1 | 1   | 0.498 | 0.80442 | 1 | 11514 |
| OUTER_MEMBRANE                        | 24  | 0.2 | 1   | 0.487 | 0.81371 | 1 | 3826  |
| LEADING_EDGE                          | 47  | 0.1 | 1   | 0.484 | 0.81308 | 1 | 12928 |
| REGULATION_OF_CYTOKINE_SECRETION      | 16  | 0.2 | 1   | 0.508 | 0.81319 | 1 | 13329 |
| DNA_REPLICATION_INITIATION            | 15  | 0.2 | 1   | 0.479 | 0.81186 | 1 | 4730  |
| NUCLEAR_BODY                          | 31  | 0.1 | 1   | 0.501 | 0.81091 | 1 | 3193  |
| NEUROTRANSMITTER_RECEPTOR_ACTIVITY    | 49  | 0.1 | 1   | 0.493 | 0.81297 | 1 | 13059 |

|                                      |     |     |     |       |         |   |       |
|--------------------------------------|-----|-----|-----|-------|---------|---|-------|
| VIRAL_GENOME_REPLICATION             | 21  | 0.2 | 1   | 0.498 | 0.81122 | 1 | 11514 |
| RHO_PROTEIN_SIGNAL_TRANSDUCTION      | 38  | 0.1 | 1   | 0.517 | 0.81456 | 1 | 11457 |
| OXIDOREDUCTASE_ACTIVITY_ACTING_ON_T  | 22  | 0.2 | 1   | 0.477 | 0.81451 | 1 | 12639 |
| PROTEIN_COMPLEX_BINDING              | 53  | 0.1 | 0.9 | 0.493 | 0.81539 | 1 | 8224  |
| STEROID_BIOSYNTHETIC_PROCESS         | 23  | 0.2 | 0.9 | 0.511 | 0.81484 | 1 | 10426 |
| VESICLE                              | 119 | 0.1 | 0.9 | 0.503 | 0.81338 | 1 | 10038 |
| ESTABLISHMENT_AND_OR_MAINTENANCE_I   | 17  | 0.2 | 0.9 | 0.502 | 0.81724 | 1 | 13517 |
| NEGATIVE_REGULATION_OF_APOPTOSIS     | 149 | 0.1 | 0.9 | 0.5   | 0.81694 | 1 | 7925  |
| PROTEIN_BINDING_BRIDGING             | 57  | 0.1 | 0.9 | 0.501 | 0.8158  | 1 | 7657  |
| REGULATION_OF_NEUROTRANSMITTER_LEV   | 24  | 0.2 | 0.9 | 0.513 | 0.81562 | 1 | 11412 |
| STRIATED_MUSCLE_DEVELOPMENT          | 40  | 0.1 | 0.9 | 0.481 | 0.81366 | 1 | 11714 |
| NEGATIVE_REGULATION_OF_TRANSCRIPTIO  | 186 | 0.1 | 0.9 | 0.496 | 0.81364 | 1 | 7764  |
| CELL_PROJECTION_PART                 | 19  | 0.2 | 0.9 | 0.517 | 0.81172 | 1 | 10038 |
| RAS_GTPASE_ACTIVATOR_ACTIVITY        | 29  | 0.2 | 0.9 | 0.514 | 0.81119 | 1 | 14108 |
| NEGATIVE_REGULATION_OF_TRANSCRIPTIO  | 15  | 0.2 | 0.9 | 0.526 | 0.80935 | 1 | 5970  |
| REGULATION_OF_ORGANELLE_ORGANIZATI   | 38  | 0.1 | 0.9 | 0.501 | 0.81762 | 1 | 10046 |
| CARBOHYDRATE_METABOLIC_PROCESS       | 177 | 0.1 | 0.9 | 0.505 | 0.81563 | 1 | 6146  |
| ACETYLTRANSFERASE_ACTIVITY           | 25  | 0.2 | 0.9 | 0.537 | 0.81522 | 1 | 10931 |
| NUCLEAR_TRANSPORT                    | 86  | 0.1 | 0.9 | 0.516 | 0.81464 | 1 | 13356 |
| GLUCOSE_METABOLIC_PROCESS            | 28  | 0.1 | 0.9 | 0.51  | 0.81736 | 1 | 6387  |
| CYTOSKELETON_DEPENDENT_INTRACELLULA  | 25  | 0.2 | 0.9 | 0.503 | 0.81617 | 1 | 9438  |
| RESPONSE_TO_EXTRACELLULAR_STIMULUS   | 32  | 0.1 | 0.9 | 0.514 | 0.81504 | 1 | 7115  |
| PROTEOGLYCAN_BIOSYNTHETIC_PROCESS    | 15  | 0.2 | 0.9 | 0.533 | 0.81548 | 1 | 3735  |
| PRIMARY_ACTIVE_TRANSMEMBRANE_TRAN    | 40  | 0.1 | 0.9 | 0.537 | 0.81664 | 1 | 12227 |
| ESTABLISHMENT_OF_PROTEIN_LOCALIZATI  | 185 | 0.1 | 0.9 | 0.548 | 0.81972 | 1 | 13439 |
| MACROMOLECULAR_COMPLEX_DISASSEMBL    | 15  | 0.2 | 0.9 | 0.536 | 0.82215 | 1 | 8521  |
| MUSCLE_DEVELOPMENT                   | 93  | 0.1 | 0.9 | 0.537 | 0.82402 | 1 | 12868 |
| RESPONSE_TO_LIGHT_STIMULUS           | 43  | 0.1 | 0.9 | 0.532 | 0.82659 | 1 | 7106  |
| NEUROTRANSMITTER_BINDING             | 52  | 0.1 | 0.9 | 0.562 | 0.82525 | 1 | 14752 |
| UBIQUITIN_LIGASE_COMPLEX             | 26  | 0.2 | 0.9 | 0.529 | 0.82877 | 1 | 2841  |
| ACTIVATION_OF_MAPK_ACTIVITY          | 37  | 0.1 | 0.9 | 0.545 | 0.82734 | 1 | 10386 |
| POSITIVE_REGULATION_OF_MAP_KINASE_A  | 42  | 0.1 | 0.9 | 0.549 | 0.83135 | 1 | 8552  |
| NUCLEAR_MEMBRANE                     | 50  | 0.1 | 0.9 | 0.556 | 0.83351 | 1 | 7056  |
| NUCLEOCYTOPLASMIC_TRANSPORT          | 85  | 0.1 | 0.9 | 0.565 | 0.83663 | 1 | 13356 |
| REGULATION_OF_G_PROTEIN_COUPLED_RE   | 22  | 0.2 | 0.9 | 0.561 | 0.83624 | 1 | 2011  |
| SULFOTRANSFERASE_ACTIVITY            | 27  | 0.1 | 0.9 | 0.575 | 0.83414 | 1 | 13403 |
| NEGATIVE_REGULATION_OF_CELLULAR_CO   | 26  | 0.1 | 0.9 | 0.556 | 0.83508 | 1 | 5685  |
| MAPKKK_CASCADE_GO_0000165            | 97  | 0.1 | 0.9 | 0.548 | 0.83301 | 1 | 12166 |
| ATPASE_ACTIVITY_COUPLED_TO_MOVEMEN   | 40  | 0.1 | 0.9 | 0.559 | 0.8316  | 1 | 15018 |
| POSITIVE_REGULATION_OF_CYTOKINE_PROI | 15  | 0.2 | 0.9 | 0.561 | 0.83892 | 1 | 13356 |
| ENZYME_ACTIVATOR_ACTIVITY            | 120 | 0.1 | 0.9 | 0.576 | 0.83843 | 1 | 14108 |
| MEMBRANE_ORGANIZATION_AND_BIOGENI    | 133 | 0.1 | 0.9 | 0.582 | 0.84046 | 1 | 8455  |
| REGULATION_OF_INTRACELLULAR_TRANSPC  | 25  | 0.1 | 0.9 | 0.557 | 0.83836 | 1 | 14706 |
| CHANNEL_REGULATOR_ACTIVITY           | 23  | 0.2 | 0.9 | 0.574 | 0.8387  | 1 | 10497 |
| NEGATIVE_REGULATION_OF_BINDING       | 18  | 0.2 | 0.9 | 0.594 | 0.84289 | 1 | 5970  |
| CYSTEINE_TYPE_ENDOPEPTIDASE_ACTIVITY | 40  | 0.1 | 0.9 | 0.587 | 0.84128 | 1 | 12289 |
| CALCIUM_MEDIATED_SIGNALING           | 16  | 0.2 | 0.9 | 0.579 | 0.84909 | 1 | 14699 |
| REGULATION_OF_MITOSIS                | 40  | 0.1 | 0.9 | 0.607 | 0.84761 | 1 | 2384  |
| POSITIVE_REGULATION_OF_RNA_METABOLI  | 120 | 0.1 | 0.9 | 0.618 | 0.84665 | 1 | 12472 |
| N_ACETYLTRANSFERASE_ACTIVITY         | 21  | 0.2 | 0.9 | 0.593 | 0.84482 | 1 | 12537 |
| PROTEIN_POLYMERIZATION               | 18  | 0.2 | 0.9 | 0.582 | 0.84703 | 1 | 9916  |
| EXONUCLEASE_ACTIVITY                 | 19  | 0.2 | 0.9 | 0.595 | 0.85414 | 1 | 6462  |
| MITOTIC_CELL_CYCLE_CHECKPOINT        | 21  | 0.2 | 0.9 | 0.613 | 0.85689 | 1 | 3106  |
| RUFFLE                               | 31  | 0.1 | 0.9 | 0.58  | 0.85607 | 1 | 13333 |
| APICAL_PART_OF_CELL                  | 16  | 0.2 | 0.9 | 0.612 | 0.85644 | 1 | 11431 |
| HYDROLASE_ACTIVITY_ACTING_ON_ACID_AI | 39  | 0.1 | 0.9 | 0.602 | 0.85632 | 1 | 12227 |
| CARBOHYDRATE_TRANSPORT               | 18  | 0.2 | 0.9 | 0.618 | 0.85482 | 1 | 8916  |
| RAS_GTPASE_BINDING                   | 25  | 0.1 | 0.9 | 0.593 | 0.8529  | 1 | 6076  |
| HORMONE_METABOLIC_PROCESS            | 31  | 0.1 | 0.9 | 0.591 | 0.85385 | 1 | 6405  |
| RHO_GTPASE_ACTIVATOR_ACTIVITY        | 19  | 0.2 | 0.9 | 0.594 | 0.85766 | 1 | 14108 |
| CARBOHYDRATE_BIOSYNTHETIC_PROCESS    | 49  | 0.1 | 0.9 | 0.608 | 0.85622 | 1 | 6576  |
| SYNAPSE                              | 27  | 0.1 | 0.9 | 0.632 | 0.85682 | 1 | 15548 |
| ORGANELLAR_RIBOSOME                  | 22  | 0.2 | 0.9 | 0.596 | 0.85554 | 1 | 15293 |
| EXTRACELLULAR_MATRIX_PART            | 56  | 0.1 | 0.9 | 0.626 | 0.85387 | 1 | 8224  |
| GOLGI_MEMBRANE                       | 43  | 0.1 | 0.9 | 0.631 | 0.85778 | 1 | 12247 |
| POSITIVE_REGULATION_OF_SECRETION     | 20  | 0.2 | 0.9 | 0.619 | 0.85654 | 1 | 15086 |
| SKELETAL_MUSCLE_DEVELOPMENT          | 31  | 0.1 | 0.9 | 0.615 | 0.85758 | 1 | 11688 |
| SULFURIC_ESTER_HYDROLASE_ACTIVITY    | 16  | 0.2 | 0.9 | 0.614 | 0.85584 | 1 | 3555  |
| CYTOSKELETAL_PROTEIN_BINDING         | 156 | 0.1 | 0.9 | 0.638 | 0.86044 | 1 | 11222 |
| INTERPHASE_OF_MITOTIC_CELL_CYCLE     | 62  | 0.1 | 0.9 | 0.627 | 0.85958 | 1 | 4730  |
| MITOCHONDRIAL_TRANSPORT              | 20  | 0.2 | 0.9 | 0.63  | 0.86588 | 1 | 10720 |

|                                       |     |     |     |       |         |   |       |
|---------------------------------------|-----|-----|-----|-------|---------|---|-------|
| SH3_SH2_ADAPTOR_ACTIVITY              | 41  | 0.1 | 0.9 | 0.647 | 0.86645 | 1 | 7657  |
| RESPONSE_TO_NUTRIENT                  | 17  | 0.2 | 0.9 | 0.7   | 0.8654  | 1 | 13897 |
| T_CELL_ACTIVATION                     | 42  | 0.1 | 0.8 | 0.66  | 0.87279 | 1 | 13078 |
| MITOCHONDRIAL_RIBOSOME                | 22  | 0.2 | 0.8 | 0.659 | 0.8726  | 1 | 15293 |
| PHOSPHOLIPID_BINDING                  | 44  | 0.1 | 0.8 | 0.671 | 0.87248 | 1 | 14072 |
| CALMODULIN_BINDING                    | 25  | 0.1 | 0.8 | 0.646 | 0.873   | 1 | 6870  |
| NEURON_DEVELOPMENT                    | 59  | 0.1 | 0.8 | 0.661 | 0.87159 | 1 | 13622 |
| CYTOPLASMIC_VESICLE_PART              | 26  | 0.1 | 0.8 | 0.679 | 0.87114 | 1 | 10007 |
| DRUG_BINDING                          | 16  | 0.2 | 0.8 | 0.644 | 0.87094 | 1 | 10369 |
| GOLGI_ASSOCIATED_VESICLE              | 27  | 0.1 | 0.8 | 0.651 | 0.87243 | 1 | 8997  |
| SERINE_TYPE_ENDOPEPTIDASE_INHIBITOR_I | 24  | 0.1 | 0.8 | 0.645 | 0.87066 | 1 | 5680  |
| N_ACYLTRANSFERASE_ACTIVITY            | 24  | 0.1 | 0.8 | 0.642 | 0.87159 | 1 | 10931 |
| PROTEIN_TRANSPORT                     | 152 | 0.1 | 0.8 | 0.671 | 0.87212 | 1 | 14421 |
| REGULATION_OF_MAPKKK_CASCADE          | 17  | 0.2 | 0.8 | 0.663 | 0.87021 | 1 | 6490  |
| CYTOPLASMIC_VESICLE_MEMBRANE          | 26  | 0.1 | 0.8 | 0.69  | 0.87118 | 1 | 10007 |
| REGULATION_OF_BINDING                 | 56  | 0.1 | 0.8 | 0.661 | 0.8769  | 1 | 10249 |
| GLYCEROPHOSPHOLIPID_BIOSYNTHETIC_PRC  | 29  | 0.1 | 0.8 | 0.626 | 0.87701 | 1 | 1358  |
| VESICULAR_FRACTION                    | 44  | 0.1 | 0.8 | 0.678 | 0.87883 | 1 | 13743 |
| SECRETION_BY_CELL                     | 113 | 0.1 | 0.8 | 0.659 | 0.88034 | 1 | 11757 |
| CELLULAR_COMPONENT_DISASSEMBLY        | 32  | 0.1 | 0.8 | 0.683 | 0.88073 | 1 | 10241 |
| REGULATION_OF_ANATOMICAL_STRUCTURE    | 24  | 0.1 | 0.8 | 0.647 | 0.87922 | 1 | 10253 |
| PROTEIN_DNA_COMPLEX_ASSEMBLY          | 48  | 0.1 | 0.8 | 0.673 | 0.88255 | 1 | 6484  |
| STRUCTURE_SPECIFIC_DNA_BINDING        | 54  | 0.1 | 0.8 | 0.685 | 0.88151 | 1 | 5978  |
| INNATE_IMMUNE_RESPONSE                | 23  | 0.1 | 0.8 | 0.672 | 0.88198 | 1 | 11611 |
| RNA_EXPORT_FROM_NUCLEUS               | 20  | 0.1 | 0.8 | 0.702 | 0.88135 | 1 | 10855 |
| POSITIVE_REGULATION_OF_TRANSCRIPTION  | 118 | 0.1 | 0.8 | 0.679 | 0.88144 | 1 | 12472 |
| SECRETORY_PATHWAY                     | 81  | 0.1 | 0.8 | 0.713 | 0.88046 | 1 | 11757 |
| REGULATION_OF_IMMUNE_EFFECTOR_PROI    | 15  | 0.2 | 0.8 | 0.702 | 0.88204 | 1 | 13672 |
| NEGATIVE_REGULATION_OF_MULTICELLULA   | 30  | 0.1 | 0.8 | 0.701 | 0.88321 | 1 | 13934 |
| EXTRACELLULAR_STRUCTURE_ORGANIZATIO   | 30  | 0.1 | 0.8 | 0.717 | 0.88776 | 1 | 6218  |
| RESPONSE_TO_NUTRIENT_LEVELS           | 29  | 0.1 | 0.8 | 0.687 | 0.88804 | 1 | 13897 |
| REGULATION_OF_JNK_ACTIVITY            | 17  | 0.2 | 0.8 | 0.699 | 0.89413 | 1 | 3428  |
| G1_PHASE                              | 15  | 0.2 | 0.8 | 0.715 | 0.89299 | 1 | 12584 |
| ALCOHOL_METABOLIC_PROCESS             | 87  | 0.1 | 0.8 | 0.72  | 0.89134 | 1 | 14478 |
| REGULATION_OF_RAS_PROTEIN_SIGNAL_TR   | 19  | 0.2 | 0.8 | 0.699 | 0.8894  | 1 | 11457 |
| HYDROGEN_ION_TRANSMEMBRANE_TRANS      | 27  | 0.1 | 0.8 | 0.706 | 0.88886 | 1 | 15057 |
| PROTEASE_INHIBITOR_ACTIVITY           | 40  | 0.1 | 0.8 | 0.686 | 0.889   | 1 | 5680  |
| HISTONE_ACETYLTTRANSFERASE_ACTIVITY   | 16  | 0.2 | 0.8 | 0.709 | 0.88795 | 1 | 3763  |
| RESPONSE_TO_RADIATION                 | 56  | 0.1 | 0.8 | 0.728 | 0.88786 | 1 | 7106  |
| TRANSCRIPTION_FACTOR_COMPLEX          | 89  | 0.1 | 0.8 | 0.701 | 0.88739 | 1 | 11093 |
| REGULATION_OF_TRANSPORT               | 67  | 0.1 | 0.8 | 0.687 | 0.88646 | 1 | 14706 |
| PROTEIN_DOMAIN_SPECIFIC_BINDING       | 70  | 0.1 | 0.8 | 0.703 | 0.88467 | 1 | 11424 |
| JNK_CASCADE                           | 42  | 0.1 | 0.8 | 0.717 | 0.88566 | 1 | 11876 |
| ANTIOXIDANT_ACTIVITY                  | 17  | 0.2 | 0.8 | 0.71  | 0.88476 | 1 | 10921 |
| PROTEIN_KINASE_INHIBITOR_ACTIVITY     | 24  | 0.1 | 0.8 | 0.719 | 0.88543 | 1 | 12584 |
| SH3_DOMAIN_BINDING                    | 15  | 0.2 | 0.8 | 0.719 | 0.88411 | 1 | 10177 |
| DNA_HELICASE_ACTIVITY                 | 24  | 0.1 | 0.8 | 0.732 | 0.88721 | 1 | 5842  |
| REGULATION_OF_TRANSLATIONAL_INITIATI  | 28  | 0.1 | 0.8 | 0.714 | 0.88865 | 1 | 10633 |
| ATPASE_ACTIVITY_COUPLED_TO_TRANSMEN   | 20  | 0.1 | 0.8 | 0.721 | 0.88688 | 1 | 7303  |
| CELL_SURFACE                          | 77  | 0.1 | 0.8 | 0.733 | 0.88777 | 1 | 10371 |
| PROTEIN_TARGETING                     | 108 | 0.1 | 0.8 | 0.726 | 0.89266 | 1 | 13737 |
| GOLGI_VESICLE_TRANSPORT               | 45  | 0.1 | 0.8 | 0.745 | 0.90191 | 1 | 3433  |
| MEIOTIC_RECOMBINATION                 | 17  | 0.2 | 0.8 | 0.759 | 0.90579 | 1 | 6723  |
| G_PROTEIN_SIGNALING_ADENYLATE_CYCLA   | 25  | 0.1 | 0.8 | 0.738 | 0.90454 | 1 | 13576 |
| REGULATION_OF_NUCLEOCYTOPLASMIC_TR    | 22  | 0.1 | 0.8 | 0.78  | 0.9027  | 1 | 14706 |
| ACTIN_FILAMENT_BINDING                | 25  | 0.1 | 0.8 | 0.737 | 0.90269 | 1 | 1268  |
| ACTIVATION_OF_PROTEIN_KINASE_ACTIVITY | 27  | 0.1 | 0.8 | 0.774 | 0.90395 | 1 | 13856 |
| SERINE_TYPE_PEPTIDASE_ACTIVITY        | 42  | 0.1 | 0.8 | 0.743 | 0.90933 | 1 | 15898 |
| PHOSPHOINOSITIDE_MEDIATED_SIGNALING   | 48  | 0.1 | 0.8 | 0.77  | 0.90864 | 1 | 14895 |
| REGULATION_OF_GROWTH                  | 55  | 0.1 | 0.8 | 0.752 | 0.90746 | 1 | 15830 |
| POSITIVE_REGULATION_OF_TRANSPORT      | 23  | 0.1 | 0.8 | 0.738 | 0.9086  | 1 | 14125 |
| SERINE_TYPE_ENDOPEPTIDASE_ACTIVITY    | 38  | 0.1 | 0.8 | 0.762 | 0.90906 | 1 | 13342 |
| CELL_PROJECTION_BIOGENESIS            | 24  | 0.1 | 0.8 | 0.79  | 0.9123  | 1 | 14177 |
| INTERPHASE                            | 68  | 0.1 | 0.8 | 0.809 | 0.9121  | 1 | 4730  |
| REGULATION_OF_PROTEIN_STABILITY       | 19  | 0.1 | 0.8 | 0.748 | 0.91383 | 1 | 15424 |
| SERINE_HYDROLASE_ACTIVITY             | 43  | 0.1 | 0.8 | 0.79  | 0.91267 | 1 | 15898 |
| RESPONSE_TO_HYPOXIA                   | 27  | 0.1 | 0.8 | 0.748 | 0.91147 | 1 | 9816  |
| ADENYLATE_CYCLASE_ACTIVATION          | 19  | 0.1 | 0.8 | 0.779 | 0.91586 | 1 | 13576 |
| ATPASE_ACTIVITY_COUPLED_TO_TRANSMEN   | 24  | 0.1 | 0.8 | 0.771 | 0.91546 | 1 | 15018 |
| INSULIN_RECEPTOR_SIGNALING_PATHWAY    | 18  | 0.1 | 0.7 | 0.784 | 0.91946 | 1 | 5433  |
| STRUCTURAL_CONSTITUENT_OF_CYTOSKELE   | 56  | 0.1 | 0.7 | 0.814 | 0.92162 | 1 | 11410 |

|                                      |     |     |     |       |         |   |       |
|--------------------------------------|-----|-----|-----|-------|---------|---|-------|
| COATED_VESICLE                       | 43  | 0.1 | 0.7 | 0.78  | 0.9221  | 1 | 10038 |
| MICROSOME                            | 42  | 0.1 | 0.7 | 0.799 | 0.92711 | 1 | 13743 |
| EXTRACELLULAR_MATRIX                 | 96  | 0.1 | 0.7 | 0.803 | 0.92566 | 1 | 8644  |
| INTRACELLULAR_PROTEIN_TRANSPORT      | 141 | 0.1 | 0.7 | 0.827 | 0.92604 | 1 | 14421 |
| PROTEASOME_COMPLEX                   | 23  | 0.1 | 0.7 | 0.822 | 0.93292 | 1 | 14213 |
| LAMELLIPODIUM                        | 25  | 0.1 | 0.7 | 0.835 | 0.94027 | 1 | 11538 |
| REGULATION_OF_MITOTIC_CELL_CYCLE     | 23  | 0.1 | 0.7 | 0.822 | 0.94266 | 1 | 4730  |
| GLUTAMATE_RECEPTOR_ACTIVITY          | 20  | 0.1 | 0.7 | 0.837 | 0.94085 | 1 | 9310  |
| EXTERNAL_SIDE_OF_PLASMA_MEMBRANE     | 15  | 0.2 | 0.7 | 0.853 | 0.93907 | 1 | 6915  |
| NEGATIVE_REGULATION_OF_PROTEIN_MET.  | 46  | 0.1 | 0.7 | 0.816 | 0.93934 | 1 | 6218  |
| REGULATION_OF_ENDOCYTOSIS            | 16  | 0.2 | 0.7 | 0.803 | 0.93798 | 1 | 9705  |
| LYMPHOCYTE_DIFFERENTIATION           | 26  | 0.1 | 0.7 | 0.859 | 0.94698 | 1 | 7651  |
| NEGATIVE_REGULATION_OF_DNA_BINDING   | 17  | 0.1 | 0.7 | 0.836 | 0.94537 | 1 | 13349 |
| CLATHRIN_COATED_VESICLE              | 35  | 0.1 | 0.7 | 0.83  | 0.94599 | 1 | 10038 |
| PROTEOLYSIS                          | 184 | 0   | 0.7 | 0.846 | 0.94442 | 1 | 16389 |
| HYDROLASE_ACTIVITY_ACTING_ON_CARBOH  | 21  | 0.1 | 0.7 | 0.869 | 0.95196 | 1 | 14037 |
| POSITIVE_REGULATION_OF_TRANSCRIPTION | 65  | 0.1 | 0.7 | 0.843 | 0.95348 | 1 | 6743  |
| G_PROTEIN_SIGNALING_COUPLED_TO_IP3_  | 45  | 0.1 | 0.7 | 0.874 | 0.95267 | 1 | 14895 |
| NEGATIVE_REGULATION_OF_CELLULAR_PRC  | 44  | 0.1 | 0.7 | 0.872 | 0.95721 | 1 | 6218  |
| NUCLEOBASENUCLEOSIDENUCLEOTIDE_AND   | 31  | 0.1 | 0.7 | 0.874 | 0.95571 | 1 | 15618 |
| REGULATION_OF_CELL_GROWTH            | 43  | 0.1 | 0.7 | 0.839 | 0.95792 | 1 | 15642 |
| LEUKOCYTE_DIFFERENTIATION            | 36  | 0.1 | 0.7 | 0.842 | 0.95814 | 1 | 9296  |
| B_CELL_ACTIVATION                    | 20  | 0.1 | 0.7 | 0.887 | 0.95855 | 1 | 13078 |
| MEIOSIS_I                            | 20  | 0.1 | 0.7 | 0.853 | 0.95923 | 1 | 6723  |
| HOMOPHILIC_CELL_ADHESION             | 16  | 0.1 | 0.7 | 0.852 | 0.96349 | 1 | 15580 |
| PROTEINACEOUS_EXTRACELLULAR_MATRIX   | 95  | 0.1 | 0.7 | 0.865 | 0.96239 | 1 | 8644  |
| NEURITE_DEVELOPMENT                  | 51  | 0.1 | 0.7 | 0.877 | 0.9638  | 1 | 11690 |
| PROTEIN_HETERODIMERIZATION_ACTIVITY  | 76  | 0.1 | 0.7 | 0.888 | 0.96624 | 1 | 10706 |
| MICROTUBULE_BASED_MOVEMENT           | 15  | 0.1 | 0.7 | 0.842 | 0.96711 | 1 | 9438  |
| TRANSFERASE_ACTIVITY_TRANSFERRING_SU | 31  | 0.1 | 0.7 | 0.874 | 0.96758 | 1 | 12185 |
| CYTOKINESIS                          | 18  | 0.1 | 0.7 | 0.889 | 0.96615 | 1 | 12648 |
| RESPONSE_TOABIOTIC_STIMULUS          | 83  | 0.1 | 0.7 | 0.878 | 0.96752 | 1 | 5842  |
| ENDOPEPTIDASE_ACTIVITY               | 112 | 0.1 | 0.7 | 0.892 | 0.96641 | 1 | 15970 |
| SYNAPTOGENESIS                       | 17  | 0.1 | 0.7 | 0.896 | 0.96468 | 1 | 5005  |
| REGULATION_OF_PROTEIN_IMPORT_INTO_I  | 16  | 0.1 | 0.7 | 0.888 | 0.96308 | 1 | 13349 |
| POSITIVE_REGULATION_OF_HYDROLASE_AC  | 54  | 0.1 | 0.7 | 0.896 | 0.96269 | 1 | 13329 |
| NUCLEOTIDE_BIOSYNTHETIC_PROCESS      | 19  | 0.1 | 0.7 | 0.897 | 0.97066 | 1 | 15713 |
| GOLGI_APPARATUS_PART                 | 96  | 0.1 | 0.7 | 0.911 | 0.97125 | 1 | 13300 |
| MEMBRANE_LIPID_METABOLIC_PROCESS     | 100 | 0.1 | 0.7 | 0.905 | 0.97201 | 1 | 1358  |
| INTRINSIC_TO_GOLGI_MEMBRANE          | 15  | 0.1 | 0.7 | 0.888 | 0.97038 | 1 | 9489  |
| REGULATION_OF_T_CELL_ACTIVATION      | 27  | 0.1 | 0.6 | 0.92  | 0.96952 | 1 | 7478  |
| KINASE_REGULATOR_ACTIVITY            | 44  | 0.1 | 0.6 | 0.933 | 0.97747 | 1 | 14557 |
| SYNAPSE_ORGANIZATION_AND_BIOGENESIS  | 22  | 0.1 | 0.6 | 0.922 | 0.97944 | 1 | 6218  |
| ADHERENS_JUNCTION                    | 22  | 0.1 | 0.6 | 0.917 | 0.98185 | 1 | 15995 |
| CELLULAR_MORPHOGENESIS_DURING_DIFFI  | 47  | 0.1 | 0.6 | 0.935 | 0.98224 | 1 | 13622 |
| ER_TO_GOLGI_VESICLE_MEDIATED_TRANSP  | 17  | 0.1 | 0.6 | 0.899 | 0.98131 | 1 | 7280  |
| SKELETAL_DEVELOPMENT                 | 101 | 0.1 | 0.6 | 0.918 | 0.97966 | 1 | 16592 |
| PURINE_RIBONUCLEOTIDE_BINDING        | 195 | 0   | 0.6 | 0.915 | 0.97891 | 1 | 3196  |
| MEMBRANE_LIPID_BIOSYNTHETIC_PROCESS  | 48  | 0.1 | 0.6 | 0.927 | 0.98223 | 1 | 7706  |
| ER_GOLGI_INTERMEDIATE_COMPARTMENT    | 24  | 0.1 | 0.6 | 0.934 | 0.98058 | 1 | 11624 |
| DIGESTION                            | 41  | 0.1 | 0.6 | 0.926 | 0.97893 | 1 | 743   |
| KINASE_INHIBITOR_ACTIVITY            | 25  | 0.1 | 0.6 | 0.93  | 0.97784 | 1 | 12584 |
| CASPASE_ACTIVATION                   | 25  | 0.1 | 0.6 | 0.915 | 0.97621 | 1 | 3198  |
| INTEGRIN_BINDING                     | 29  | 0.1 | 0.6 | 0.92  | 0.97506 | 1 | 8224  |
| CELL_DIVISION                        | 20  | 0.1 | 0.6 | 0.912 | 0.97834 | 1 | 13285 |
| MYOBLAST_DIFFERENTIATION             | 17  | 0.1 | 0.6 | 0.949 | 0.97711 | 1 | 11551 |
| ACTIN_FILAMENT_ORGANIZATION          | 24  | 0.1 | 0.6 | 0.932 | 0.97619 | 1 | 4900  |
| PROTON_TRANSPORTING_TWO_SECTOR_AT    | 15  | 0.1 | 0.6 | 0.94  | 0.97476 | 1 | 12100 |
| CELL_CYCLE_ARREST_GO_0007050         | 54  | 0.1 | 0.6 | 0.923 | 0.97981 | 1 | 14463 |
| NEUROPEPTIDE_BINDING                 | 22  | 0.1 | 0.6 | 0.939 | 0.98189 | 1 | 14551 |
| GTPASE_ACTIVATOR_ACTIVITY            | 58  | 0.1 | 0.6 | 0.948 | 0.98353 | 1 | 15642 |
| LYTIC_VACUOLE                        | 61  | 0.1 | 0.6 | 0.951 | 0.98297 | 1 | 10703 |
| LYSOSOME                             | 61  | 0.1 | 0.6 | 0.95  | 0.98405 | 1 | 10703 |
| ANION_TRANSMEMBRANE_TRANSPORTER_J    | 59  | 0.1 | 0.6 | 0.947 | 0.98484 | 1 | 16917 |
| MORPHOGENESIS_OF_AN_EPITHELIUM       | 16  | 0.1 | 0.6 | 0.934 | 0.98421 | 1 | 6835  |
| PROTEIN_OLIGOMERIZATION              | 38  | 0.1 | 0.6 | 0.939 | 0.98593 | 1 | 7616  |
| INTRINSIC_TO_ORGANELLE_MEMBRANE      | 51  | 0.1 | 0.6 | 0.954 | 0.98644 | 1 | 14372 |
| CELL_PROJECTION                      | 105 | 0   | 0.6 | 0.967 | 0.98604 | 1 | 14304 |
| VESICLE_MEMBRANE                     | 28  | 0.1 | 0.6 | 0.97  | 0.98474 | 1 | 10007 |
| HYDRO_LYASE_ACTIVITY                 | 27  | 0.1 | 0.6 | 0.965 | 0.98718 | 1 | 3734  |
| CELL_SUBSTRATE_ADHERENS_JUNCTION     | 15  | 0.1 | 0.6 | 0.965 | 0.98547 | 1 | 6270  |

|                                      |    |     |     |       |         |   |       |
|--------------------------------------|----|-----|-----|-------|---------|---|-------|
| ACTIN_POLYMERIZATION_AND_OR_DEPOLYI  | 23 | 0.1 | 0.6 | 0.967 | 0.98464 | 1 | 10031 |
| RECEPTOR_MEDIATED_ENDOCYTOSIS        | 33 | 0.1 | 0.6 | 0.971 | 0.98433 | 1 | 8403  |
| STRESS_ACTIVATED_PROTEIN_KINASE_SIGN | 44 | 0.1 | 0.6 | 0.96  | 0.98307 | 1 | 15552 |
| INORGANIC_CATION_TRANSMEMBRANE_TR    | 57 | 0.1 | 0.6 | 0.969 | 0.98219 | 1 | 15057 |
| NEUROPEPTIDE_RECEPTOR_ACTIVITY       | 21 | 0.1 | 0.6 | 0.979 | 0.98096 | 1 | 14551 |
| HORMONE_ACTIVITY                     | 43 | 0.1 | 0.5 | 0.984 | 0.99173 | 1 | 10123 |
| T_CELL_DIFFERENTIATION               | 15 | 0.1 | 0.5 | 0.979 | 0.99273 | 1 | 7651  |
| INTEGRAL_TO_ORGANELLE_MEMBRANE       | 49 | 0.1 | 0.5 | 0.985 | 0.99176 | 1 | 14372 |
| PROTEIN_SECRETION                    | 32 | 0.1 | 0.5 | 0.988 | 0.99073 | 1 | 13329 |
| REGULATION_OF_CELL_MIGRATION         | 28 | 0.1 | 0.5 | 0.99  | 0.99568 | 1 | 10254 |
| NUCLEAR_EXPORT                       | 33 | 0.1 | 0.4 | 1     | 0.99933 | 1 | 1649  |



**Table S4** | Top 1000 depleted genes for both A375 and HUES62. Mean depletion for each gene is given as the log<sub>2</sub> ratio of Day 14 vs. Day 3 representation (mean over sgRNAs for the gene).

| A375        |                | HUES62    |                |
|-------------|----------------|-----------|----------------|
| gene_name   | mean depletion | gene_name | mean depletion |
| RPS19       | -2.882652431   | RPS19     | -3.183585341   |
| TCOF1       | -2.808435977   | SUMO1     | -2.958691468   |
| NIP7        | -2.577017439   | IGFN1     | -2.816486619   |
| CARS2       | -2.524564219   | AGAP5     | -2.781890338   |
| RPL7        | -2.510763424   | VOPP1     | -2.764536999   |
| ARL17A      | -2.452404991   | JAKMIP1   | -2.722075866   |
| RPS18       | -2.360007937   | HIST2H2AC | -2.609990396   |
| RPS11       | -2.331818955   | SPHAR     | -2.582311984   |
| RPL32       | -2.27812036    | LCE3E     | -2.525929706   |
| DENR        | -2.257042611   | PDRG1     | -2.499694407   |
| RPL6        | -2.23869209    | RRP1B     | -2.361922343   |
| ADSL        | -2.237218508   | PFDN4     | -2.321026472   |
| DNM2        | -2.213359485   | OVGP1     | -2.294064989   |
| ACTL6A      | -2.197447807   | CCDC58    | -2.290819552   |
| PPAN        | -2.178384698   | HIST1H2BJ | -2.288803994   |
| NT5C1B-RDH  | -2.175777594   | CCDC73    | -2.279966592   |
| ENO1        | -2.17247027    | ZSCAN18   | -2.277760787   |
| DOLK        | -2.140854234   | DENR      | -2.253261386   |
| ASH2L       | -2.137162022   | CHKA      | -2.231856136   |
| SNRPF       | -2.129389793   | FAM185A   | -2.226396662   |
| RPL26       | -2.125670091   | OCM       | -2.225306785   |
| GABPA       | -2.106954316   | KBTBD11   | -2.2083224     |
| VOPP1       | -2.088272162   | RPL32     | -2.198484015   |
| RSL1D1      | -2.077068149   | RBMXL2    | -2.193406936   |
| RRAGA       | -2.075755103   | LRRC37A3  | -2.188978264   |
| URB1        | -2.061968502   | SNRPG     | -2.180311606   |
| MRP63       | -2.058260881   | POLR2J    | -2.179863073   |
| NAA30       | -2.056104946   | EID1      | -2.177256367   |
| KPNB1       | -2.045863711   | HMGNA4    | -2.152073487   |
| RPL39       | -2.042789125   | FJK1      | -2.144074596   |
| EIF2B5      | -2.018537107   | MRPS18C   | -2.143839164   |
| XRN1        | -2.007802712   | UTP18     | -2.13822949    |
| LSM2        | -2.006908746   | GCSH      | -2.123373465   |
| MASP2       | -1.996597431   | HIST1H2AG | -2.10248405    |
| DEFB131     | -1.981628571   | MT1E      | -2.102441783   |
| LSM7        | -1.977614338   | RPL30     | -2.087694615   |
| NHP2L1      | -1.977025309   | TMEM52    | -2.078628045   |
| RPS15A      | -1.964623412   | XPA       | -2.075701399   |
| EEF1A1      | -1.940570892   | ARHGEF19  | -2.074475526   |
| RBX1        | -1.931878232   | RAMP2     | -2.071163793   |
| PTPMT1      | -1.931127795   | MTA3      | -2.060680607   |
| CCDC146     | -1.930330138   | POLRMT    | -2.058734986   |
| COBRA1      | -1.924683023   | ZNF524    | -2.051959832   |
| VPS25       | -1.919175993   | RSL24D1   | -2.047403722   |
| RPL8        | -1.915827854   | EXOSC1    | -2.036942474   |
| POLR2I      | -1.914363716   | BATF      | -2.035568177   |
| NHP2        | -1.908840701   | KRTAP11-1 | -2.033591989   |
| OR5M3       | -1.903054531   | FCF1      | -2.03040005    |
| SDAD1       | -1.898279431   | NEUROG1   | -2.024122047   |
| DNAJA3      | -1.895932148   | NSRP1     | -2.016177389   |
| IMP4        | -1.886050088   | XYLT1     | -2.013363239   |
| MOAP1       | -1.882851477   | CNIH4     | -2.010919939   |
| NUTF2       | -1.873263167   | RPS7      | -2.005077402   |
| PTPN23      | -1.869411288   | PLAC9     | -1.99787552    |
| RPL14       | -1.854061225   | DCPS      | -1.993526745   |
| RP11-110H1. | -1.838203216   | HMGN1     | -1.985137369   |
| TPT1        | -1.834186561   | HIST1H2BM | -1.966034904   |
| COPS3       | -1.830313031   | RPS11     | -1.958203408   |
| HARS        | -1.808567224   | TP53TG5   | -1.952603327   |
| ATP6VOC     | -1.806752366   | KRT82     | -1.951720459   |
| CCNH        | -1.802427683   | MRP63     | -1.950917553   |
| RPL7A       | -1.801850968   | OR51V1    | -1.950395101   |
| COL25A1     | -1.789186395   | RPL7A     | -1.945684794   |
| EEF2        | -1.773430832   | MTMR1     | -1.942316422   |
| EEFSEC      | -1.773082367   | TMEM144   | -1.940658066   |
| LGALS8      | -1.772564445   | ACSM1     | -1.938959493   |
| SFPQ        | -1.771314781   | RRN3      | -1.933600629   |
| EIF2S3      | -1.769731164   | IPO4      | -1.932523341   |
| COPB1       | -1.762259717   | HNRNPU    | -1.929921878   |
| RBMX2       | -1.758857017   | GTF3C1    | -1.924067851   |
| POLR3H      | -1.753585716   | RPL6      | -1.923613883   |
| RPL10       | -1.75174146    | CCDC90B   | -1.916359703   |
| TMLHE       | -1.750717975   | C15orf42  | -1.912360544   |
| TUBG1       | -1.749877928   | CITED4    | -1.912125059   |
| ANKRD30A    | -1.74932094    | CXCR3     | -1.910371663   |
| KCNJ16      | -1.74542423    | ICOS      | -1.907257673   |
| ZNF207      | -1.743830295   | AKR1A1    | -1.904032674   |
| PTRH2       | -1.735681069   | WDR83OS   | -1.902920977   |
| CAPZB       | -1.733659665   | RMI1      | -1.900641673   |

|          |                       |              |
|----------|-----------------------|--------------|
| HNRNPU   | -1.732106008 RFC5     | -1.894008779 |
| YEATS2   | -1.72409334 OR5AR1    | -1.888994891 |
| RPL37    | -1.72397052 FAM96B    | -1.88827946  |
| RPF1     | -1.722952482 PCDHB1   | -1.887315952 |
| SUMO2    | -1.722198581 RPL8     | -1.862649576 |
| ACACA    | -1.719950822 TTLL4    | -1.862595159 |
| CAPZA1   | -1.719035764 ELOVL2   | -1.858705763 |
| FARSB    | -1.707506458 JAG2     | -1.853386152 |
| CTDP1    | -1.705884315 RBMX2    | -1.842871507 |
| SS18L2   | -1.70390379 POLR3K    | -1.8372641   |
| CENPI    | -1.703824885 ZBTB39   | -1.834577541 |
| PRPF38B  | -1.703372866 PKD1     | -1.834139042 |
| SF3B1    | -1.702731503 MFSD2A   | -1.833483748 |
| MAPK1    | -1.69651763 RAE1      | -1.833119559 |
| MOCS3    | -1.68666595 RIMBP3B   | -1.832150575 |
| POP7     | -1.685420318 PKN3     | -1.831875987 |
| UTP18    | -1.684192052 YY1      | -1.830589818 |
| ME3      | -1.683035372 CWC25    | -1.829810575 |
| PSMC2    | -1.681322654 ARSE     | -1.823179326 |
| TBC1D2B  | -1.680850452 NBR1     | -1.823032991 |
| MRPL17   | -1.678664073 PRNP     | -1.815793705 |
| PIGW     | -1.676457135 NUDC     | -1.81045846  |
| RPL30    | -1.674678234 KDM4E    | -1.810122958 |
| GFM1     | -1.672030725 RBX1     | -1.800761527 |
| APPL1    | -1.667691292 TSPYL2   | -1.800195078 |
| PRAMEF18 | -1.661579353 RALGDS   | -1.798929091 |
| THOC2    | -1.659978325 C14orf80 | -1.796756631 |
| DCPS     | -1.65488046 APBA3     | -1.791344673 |
| RPS21    | -1.649662797 ENO1     | -1.79011033  |
| POLR2L   | -1.647400059 SMG1     | -1.784878697 |
| DPPA3    | -1.643632209 C9orf169 | -1.778113126 |
| PRAMEF11 | -1.640377216 ZNRD1    | -1.774181477 |
| TBCC     | -1.637735404 KCNJ16   | -1.769711082 |
| MRPS12   | -1.637593143 POLR2I   | -1.769423783 |
| EFTUD2   | -1.63609533 UBA52     | -1.768260354 |
| BEX1     | -1.634269725 NOC4L    | -1.764945455 |
| NOL6     | -1.63270992 HORMAD2   | -1.764870613 |
| HNRNPK   | -1.631201515 OR9Q2    | -1.760481348 |
| SNRNP70  | -1.630423532 HPN      | -1.75865726  |
| RPL4     | -1.628309405 KRT24    | -1.758465732 |
| H3F3B    | -1.621875698 FOXH1    | -1.757242912 |
| MATR3    | -1.620666917 GDF9     | -1.756109302 |
| RPL38    | -1.618433284 CEP290   | -1.753803294 |
| PGD      | -1.617906932 ADRA2C   | -1.753773058 |
| DAP3     | -1.616024661 TULP1    | -1.749849627 |
| TSR1     | -1.612896573 LTBR     | -1.749021049 |
| SMC1A    | -1.607195432 ZCCHC12  | -1.746744432 |
| RPL9     | -1.606191161 RPAIN    | -1.73474472  |
| RPS12    | -1.603986362 B3GALT4  | -1.733297288 |
| SNRNP200 | -1.597597784 ATP1A2   | -1.728486738 |
| ZNRD1    | -1.595667827 PCDHB16  | -1.728250573 |
| TFAM     | -1.592538964 CDAN1    | -1.724068055 |
| TLN1     | -1.592240013 PIP5K1C  | -1.723834562 |
| CHST7    | -1.591104236 MPP4     | -1.722234521 |
| RFK      | -1.589972652 SPOCD1   | -1.721697697 |
| VARS     | -1.589849258 H3F3B    | -1.721342781 |
| WT1      | -1.588292311 RPS21    | -1.717399432 |
| PDAP1    | -1.588174658 BEX1     | -1.716075951 |
| WARS2    | -1.586972934 DDX41    | -1.716023943 |
| OCM      | -1.586564929 ATP12A   | -1.714599078 |
| TEX14    | -1.582436009 PLEKHA6  | -1.71359395  |
| OR7C2    | -1.580970812 SIGLECS  | -1.711535603 |
| SNAP23   | -1.579522004 GPR115   | -1.711244409 |
| FURIN    | -1.579107358 PGBD4    | -1.709127717 |
| C19orf25 | -1.576034681 ABCC3    | -1.709096583 |
| GNB2L1   | -1.57535027 C1QTNF4   | -1.704914364 |
| PCF11    | -1.573868556 SUZ12    | -1.702460494 |
| C6orf226 | -1.573804931 IRS1     | -1.701590078 |
| DHX15    | -1.570412486 POLR1A   | -1.7013335   |
| NUP88    | -1.567264532 TMEM183A | -1.700220613 |
| EIF2S1   | -1.563321294 OR52B4   | -1.699496045 |
| PET117   | -1.562889941 SLC13A2  | -1.699062296 |
| PPP2CA   | -1.562824258 TUBGCP3  | -1.695027009 |
| CMPK1    | -1.557510591 GGT7     | -1.690668273 |
| RAE1     | -1.553916339 OR1D2    | -1.689507147 |
| CIRH1A   | -1.55196902 TUBG2     | -1.686771713 |
| DDX42    | -1.548957925 FOXB1    | -1.686159699 |
| POLR3A   | -1.54531119 COX4I2    | -1.685145656 |
| RPS5     | -1.544242565 CFHR5    | -1.684484434 |
| RUVBL2   | -1.54307586 COX7B2    | -1.683824823 |
| KHDRBS1  | -1.540530485 ZMYND8   | -1.679931871 |
| UBQLN3   | -1.539875621 ANKLE2   | -1.67977325  |
| SART3    | -1.538803977 ZBTB32   | -1.677758798 |
| CTU2     | -1.532672693 MEX3A    | -1.67283445  |
| EXOSC9   | -1.53240283 IRF2BPL   | -1.66817721  |

|             |              |               |              |
|-------------|--------------|---------------|--------------|
| EIF3D       | -1.531272229 | XPO1          | -1.665911185 |
| FOSL1       | -1.525912762 | SERPINB3      | -1.665420952 |
| SKIV2L2     | -1.524792166 | SPC24         | -1.664003074 |
| NSL1        | -1.523902984 | ZNF835        | -1.663591136 |
| PKD2L2      | -1.522030203 | HSP90AB1      | -1.65845304  |
| COX17       | -1.521428227 | C1orf52       | -1.657906239 |
| RAB3GAP1    | -1.518439462 | EXOSC8        | -1.657418649 |
| SBDS        | -1.518313565 | PPP1R7        | -1.654337881 |
| HSD17B10    | -1.516651173 | ANAPC7        | -1.654087519 |
| RPL34       | -1.514777041 | PDP2          | -1.652883515 |
| MRPL41      | -1.514148656 | LRRC6         | -1.649462528 |
| KIF23       | -1.511701917 | PCDHGC5       | -1.641146446 |
| BRIP1       | -1.510169164 | ECH1          | -1.637984733 |
| PSMA3       | -1.50978052  | BIRC6         | -1.635174985 |
| MYO18A      | -1.506084393 | CHMP4C        | -1.631396522 |
| OR5K3       | -1.501361245 | URB1          | -1.628023834 |
| PCNA        | -1.500086419 | PPP4C         | -1.626848674 |
| COX4I1      | -1.495514571 | LRRC3         | -1.624158807 |
| CCDC23      | -1.491525997 | FAM207A       | -1.623564041 |
| SLC26A7     | -1.491379231 | TSSK1B        | -1.623386054 |
| GJA3        | -1.490625294 | SNRNP35       | -1.622193825 |
| PMF1        | -1.489084741 | ENTPD7        | -1.621420381 |
| ZNF259      | -1.488562555 | ZNF559        | -1.619457887 |
| ARHGAP11A   | -1.487361831 | PLEKHA3       | -1.619359014 |
| INTS8       | -1.485702565 | PSMB11        | -1.619357614 |
| COX5B       | -1.483628484 | C12orf57      | -1.6192204   |
| BCL2L2-PABF | -1.479334824 | BCL9L         | -1.616431663 |
| ATP6AP2     | -1.476781098 | COL6A2        | -1.616189888 |
| FNTB        | -1.473951658 | PHLDA2        | -1.616178629 |
| MTA3        | -1.473861711 | ERAS          | -1.613501381 |
| TDRD10      | -1.473540335 | GAS8          | -1.611441409 |
| TSG101      | -1.472472944 | ANAPC1        | -1.609927961 |
| HSP90B1     | -1.472220581 | PHIP          | -1.606091841 |
| KIF2A       | -1.471850262 | TMEM234       | -1.605376698 |
| MED14       | -1.469852205 | RPL13A        | -1.603258551 |
| ANKRD49     | -1.469829543 | USP44         | -1.601487248 |
| PSMB4       | -1.468797099 | HNRNPA0       | -1.601341264 |
| COX5A       | -1.467673157 | COX6B1        | -1.598937125 |
| PCBP1       | -1.465993867 | KRTCAP2       | -1.597973049 |
| FCF1        | -1.465773243 | CASKIN1       | -1.597967074 |
| TINF2       | -1.465625197 | IFNB1         | -1.588890032 |
| LAMTOR3     | -1.461323319 | MED21         | -1.588539266 |
| RPL11       | -1.459385197 | SDSL          | -1.588435672 |
| MDM2        | -1.457827281 | RPS6          | -1.587775088 |
| CTNNB1      | -1.457311148 | DDX42         | -1.587535926 |
| RPL15       | -1.457245851 | LIN7C         | -1.587142859 |
| SOX10       | -1.457045107 | UBXN4         | -1.587070505 |
| TUBGCP3     | -1.455922895 | DSN1          | -1.582628585 |
| KDSR        | -1.45079145  | NTAN1         | -1.581097107 |
| HSPA8       | -1.44920478  | CDC26         | -1.580081851 |
| MAD2L1      | -1.448620304 | PIGM          | -1.578178236 |
| ZFH3        | -1.447869343 | CHD6          | -1.577282235 |
| DYNLL1      | -1.446908968 | CHORDC1       | -1.574916503 |
| C17orf81    | -1.444492658 | UVRAG         | -1.573957952 |
| NGDN        | -1.444452376 | ZNF580        | -1.572557983 |
| CENPC1      | -1.444330973 | OR4D10        | -1.570303265 |
| POLR3K      | -1.444320245 | COG6          | -1.569988804 |
| KRI1        | -1.443946118 | FBXO41        | -1.567074156 |
| DNAJB1      | -1.443734639 | C1orf150      | -1.566762543 |
| SLC35C2     | -1.442854155 | MMP23B        | -1.56595931  |
| SAE1        | -1.437585047 | FFAR3         | -1.562720247 |
| NR1I3       | -1.437194199 | PIGW          | -1.562033012 |
| NKAP        | -1.436957722 | ZRSR2         | -1.560314358 |
| TBCA        | -1.436566244 | ARMC7         | -1.56023241  |
| CABIN1      | -1.434611745 | EIF6          | -1.558951618 |
| HJURP       | -1.433849464 | ANKRD49       | -1.55887604  |
| TRMT112     | -1.433490187 | PIK3CA        | -1.558845668 |
| ZNF529      | -1.432525336 | DEFB131       | -1.55797361  |
| RPS27A      | -1.432347982 | CLDN4         | -1.550420395 |
| ARMC7       | -1.429603057 | C5orf62       | -1.548815903 |
| AGAP6       | -1.429039924 | C7            | -1.548712647 |
| POLR1B      | -1.428651863 | COPB1         | -1.548302258 |
| FAM96B      | -1.427271021 | STX18         | -1.547594206 |
| PMVK        | -1.42708923  | MASP2         | -1.545823489 |
| CSNK2B      | -1.426586006 | RP11-528L24.3 | -1.545098873 |
| KPNA4       | -1.426305655 | PEX16         | -1.544210673 |
| RPL13       | -1.425968515 | TMCC3         | -1.542308989 |
| RPL35A      | -1.425528555 | FTSJD1        | -1.541220008 |
| CUL1        | -1.425420937 | PDF           | -1.540774209 |
| SUPT6H      | -1.424775226 | TSR1          | -1.537975442 |
| RPS3        | -1.424672812 | WWC2          | -1.535385295 |
| RRP1        | -1.424495031 | EIF4E1B       | -1.535041313 |
| SF1         | -1.422731301 | PCDHB7        | -1.534750337 |
| IL9         | -1.422056509 | ASNS          | -1.533747699 |
| BUB1        | -1.421531126 | GNG7          | -1.533427432 |

|          |                        |              |
|----------|------------------------|--------------|
| YY1      | -1.419062109 RBM48     | -1.531893314 |
| SMARCA5  | -1.416042074 HIST2H2BE | -1.530781789 |
| PSMD12   | -1.415969492 CGB1      | -1.530628903 |
| RANBP1   | -1.415302054 S100A11   | -1.529786068 |
| PSMB1    | -1.415056441 EIF5      | -1.52717872  |
| WDR74    | -1.414139191 DGCR8     | -1.52706625  |
| RPL13A   | -1.413479285 ZNF226    | -1.526829346 |
| BUD31    | -1.413072743 PI4K2A    | -1.52350573  |
| CDC45    | -1.412488904 LRRK1     | -1.520636889 |
| PPA1     | -1.410634008 SGTA      | -1.519321666 |
| RPS14    | -1.410592726 TOMM22    | -1.518878323 |
| NOC4L    | -1.409986802 POTES     | -1.517539425 |
| CCDC59   | -1.409761529 PSME3     | -1.514880312 |
| EXOSC8   | -1.409548516 ZBTB8OS   | -1.514406895 |
| POLR2E   | -1.408878942 LCN8      | -1.513494042 |
| DGCR8    | -1.406358064 CDC42BPB  | -1.512815457 |
| TOR1AIP1 | -1.406117404 PA2G4     | -1.511632954 |
| EXOSC5   | -1.405249481 PLEKHH1   | -1.510365559 |
| CSTF3    | -1.403919466 POP7      | -1.50968476  |
| USP1     | -1.403615672 TFAM      | -1.509576181 |
| ANAPC7   | -1.401430164 ATP6VOC   | -1.508572478 |
| MDN1     | -1.401349647 C6orf226  | -1.507967003 |
| GAPDH    | -1.400273726 MEIS1     | -1.506671145 |
| ST13     | -1.398019204 PRDM14    | -1.505804106 |
| CCDC73   | -1.394548173 QRFP      | -1.504909604 |
| TERF2    | -1.394231255 BRAT1     | -1.504170191 |
| NOL12    | -1.391253457 WDR76     | -1.502637608 |
| DBR1     | -1.390682155 VWDE      | -1.499084118 |
| RBBP5    | -1.390436818 KLHL34    | -1.497309165 |
| CASC5    | -1.390361403 ALLC      | -1.497016423 |
| ARL2     | -1.390023083 CAPZA1    | -1.496931761 |
| ISCA2    | -1.38933325 CTU1       | -1.496320563 |
| MTHFD1   | -1.386699362 C1orf106  | -1.494150836 |
| RFC5     | -1.383251013 C8orf87   | -1.491902933 |
| PRKRIR   | -1.382824438 KRT13     | -1.49155935  |
| UBC      | -1.382750556 CLUL1     | -1.491275178 |
| CHTF8    | -1.38225867 PSMB3      | -1.490755153 |
| MORF4L1  | -1.381829505 OR4D9     | -1.489301628 |
| CAD      | -1.379757313 ZNF286B   | -1.488105536 |
| HDAC3    | -1.37833297 KIF7       | -1.486770611 |
| DDX56    | -1.377476726 LIPA      | -1.486482578 |
| PPP1R8   | -1.375613344 DDN       | -1.485213685 |
| PSMB3    | -1.374687561 RSL1D1    | -1.48495182  |
| VCP      | -1.374559966 SNAPC4    | -1.481726315 |
| RAB1B    | -1.373544935 TWF1      | -1.478742287 |
| KRT18    | -1.372653828 SKIDA1    | -1.477895018 |
| EIF3H    | -1.372395627 DSCAM     | -1.477613686 |
| MRPS21   | -1.371688338 CEND1     | -1.476763069 |
| SPATA5   | -1.371546126 USP43     | -1.47642241  |
| SF3B5    | -1.369704708 PHPT1     | -1.475208586 |
| DHX36    | -1.368521429 IGSF23    | -1.473471073 |
| CTDSPL   | -1.368281653 CTSZ      | -1.473223599 |
| C15orf63 | -1.368169783 HYI       | -1.471848137 |
| MND1     | -1.367148567 UCN       | -1.471798831 |
| CHEK1    | -1.365498493 JUNB      | -1.471440183 |
| PSMB2    | -1.364829623 GRB2      | -1.471324217 |
| HSCB     | -1.36414551 TAF1C      | -1.469335239 |
| PFN1     | -1.363847136 PFDN6     | -1.4692714   |
| GTPBP4   | -1.363346727 EID2B     | -1.468609431 |
| TRAPPC4  | -1.363085076 GSTZ1     | -1.468284552 |
| TSEN54   | -1.362994692 PPYR1     | -1.467815553 |
| RAPGEF6  | -1.362698559 WBP1L     | -1.467487002 |
| CDC48    | -1.361945902 ATR       | -1.467141443 |
| ATP2A2   | -1.359896755 CAPZB     | -1.466475244 |
| PSMA6    | -1.359123109 EBF2      | -1.465721319 |
| COX6B1   | -1.358954106 RFC4      | -1.465537537 |
| CDK11A   | -1.358922606 SBDS      | -1.465522817 |
| SNRPD3   | -1.358794551 GCNT4     | -1.465420968 |
| ZBTB8OS  | -1.357703857 USF2      | -1.464916149 |
| MRT04    | -1.356742848 ANKRD39   | -1.462602755 |
| AP3B1    | -1.355796412 ZNF207    | -1.461823849 |
| INTS6    | -1.35449457 SLC43A1    | -1.461538671 |
| EIF6     | -1.35358833 NOL3       | -1.46141808  |
| RPLP0    | -1.353376057 MARCH11   | -1.461169146 |
| CDAN1    | -1.35102352 SMPD2      | -1.460881076 |
| ZFAND1   | -1.350180008 C11orf86  | -1.460075591 |
| RSL24D1  | -1.349719816 MTRNR2L5  | -1.459134583 |
| SRSF10   | -1.349670653 ZRANB2    | -1.458627153 |
| CINP     | -1.349546146 OR5K3     | -1.458559144 |
| PES1     | -1.348241514 HOXA5     | -1.458453821 |
| EIF1AD   | -1.347681684 ARL17A    | -1.457715258 |
| SKP1     | -1.347077683 PPP2CA    | -1.455987502 |
| CLEC10A  | -1.346590066 TBL3      | -1.455849732 |
| POLR2D   | -1.344792099 RNF20     | -1.455503496 |
| EIF1     | -1.344559124 TBCA      | -1.455477108 |

|            |              |               |              |
|------------|--------------|---------------|--------------|
| WDR83      | -1.344216107 | RP11-865813.1 | -1.455277909 |
| SOD1       | -1.340312573 | PCBP1         | -1.454318626 |
| SRSF3      | -1.340212883 | KDSR          | -1.453151002 |
| TAF3       | -1.340156516 | BCAS2         | -1.451342376 |
| SNRPC      | -1.338898127 | XIAP          | -1.450998896 |
| HMGCS1     | -1.338505207 | TPM1          | -1.449883189 |
| HSPD1      | -1.33600512  | GPAM          | -1.449815505 |
| PPA2       | -1.335089026 | GARS          | -1.449537798 |
| PFDN6      | -1.334945087 | ALPK3         | -1.448868238 |
| NDUFB10    | -1.332788339 | TFPT          | -1.447926352 |
| IRS2       | -1.332719121 | RNF112        | -1.447803365 |
| MED21      | -1.330290534 | TCTEX1D2      | -1.446558259 |
| CRCP       | -1.329915908 | SLC27A5       | -1.446399836 |
| SCO2       | -1.329754225 | VPS13C        | -1.445038424 |
| LYRM4      | -1.328951694 | IBSP          | -1.443552161 |
| NDUFB9     | -1.32771624  | NBPF3         | -1.443366804 |
| WDR55      | -1.327002318 | KRTAP4-6      | -1.4424052   |
| PSMD6      | -1.325359209 | OR9I1         | -1.44221679  |
| C10orf55   | -1.324464755 | CMTM3         | -1.437804933 |
| SNAPC2     | -1.323520448 | AGR2          | -1.436764518 |
| TRAIP      | -1.322210841 | HSD17B10      | -1.436364916 |
| FBL        | -1.319362758 | MSI2          | -1.436233319 |
| SRSF11     | -1.319216433 | DCAF12        | -1.435991517 |
| DIMT1      | -1.317151465 | DNAJC11       | -1.435812507 |
| MKI67IP    | -1.315985385 | NIP7          | -1.434745113 |
| NOP16      | -1.312616718 | MKL1          | -1.434161817 |
| CWC25      | -1.31108751  | PATE2         | -1.434142561 |
| FSCN1      | -1.310209463 | RTEL1         | -1.432960631 |
| UBE2M      | -1.309779639 | F10           | -1.432954392 |
| SRP54      | -1.30952802  | KCND2         | -1.432764699 |
| RPA3       | -1.309065263 | PRR23C        | -1.432736286 |
| C11orf75   | -1.308307405 | EXOSC7        | -1.431428179 |
| AMD1       | -1.307680016 | RIF1          | -1.429355634 |
| PTK2       | -1.307634623 | KRT28         | -1.426931464 |
| PRRG4      | -1.304157843 | GPR124        | -1.426512806 |
| SFXN4      | -1.303922126 | DLL3          | -1.422088402 |
| DHX8       | -1.302999971 | C10orf131     | -1.421588642 |
| SMC2       | -1.302938995 | ATF5          | -1.420593385 |
| ACY1       | -1.302662808 | KRTAP19-4     | -1.420517301 |
| GPN3       | -1.298923505 | PRODH         | -1.41981364  |
| SOCS3      | -1.298536471 | C21orf59      | -1.419547323 |
| NTN4       | -1.296514333 | LCE3D         | -1.418646134 |
| UTP14A     | -1.296499694 | CRH           | -1.418237482 |
| CHORDC1    | -1.295389856 | BCL2L1        | -1.418154714 |
| RBM48      | -1.294610249 | TOX4          | -1.416333246 |
| MRPS27     | -1.291129159 | FAM98B        | -1.416148755 |
| DDX41      | -1.290973169 | MYC           | -1.415587444 |
| MARS2      | -1.2900804   | PSIP1         | -1.414341502 |
| PSME3      | -1.289452298 | NRF1          | -1.414197906 |
| CENPE      | -1.288374691 | EEF1A1        | -1.414055367 |
| VPS54      | -1.288113709 | OR4F5         | -1.41217241  |
| C1orf21    | -1.287670003 | MPLKIP        | -1.412154342 |
| AURKA      | -1.287485326 | LRRN1         | -1.412104794 |
| NCL        | -1.286720673 | CASC4         | -1.411972135 |
| RNGTT      | -1.286293458 | NUTF2         | -1.410112582 |
| RPS20      | -1.285376604 | TC2N          | -1.409869276 |
| PRIM1      | -1.285117926 | C19orf60      | -1.409097495 |
| CERS1      | -1.28449224  | DES1I         | -1.408796498 |
| SRRM1      | -1.283215691 | AHSA2         | -1.408275819 |
| RPS9       | -1.281865487 | BCHE          | -1.408238246 |
| POLR3B     | -1.280777839 | CHIC1         | -1.408053615 |
| MPLKIP     | -1.280705404 | CUBN          | -1.406323811 |
| UFD1L      | -1.278303239 | C1orf159      | -1.40503451  |
| ATP6AP1    | -1.277872404 | OSBPL7        | -1.404804585 |
| ZMYND8     | -1.273803762 | FGF11         | -1.403468367 |
| CCDC7      | -1.273509948 | FAM70B        | -1.403401331 |
| ABHD11     | -1.273190504 | EIF2C2        | -1.402259615 |
| CCNA2      | -1.272760173 | C9orf152      | -1.401137235 |
| GABPB1     | -1.269810752 | KRTAP4-2      | -1.400786406 |
| HIVEP3     | -1.269565848 | NT5DC1        | -1.400673886 |
| BRD2       | -1.267679421 | RPS27A        | -1.399937957 |
| DCTN4      | -1.26703886  | C19orf52      | -1.399507166 |
| BUB3       | -1.26667183  | NAA30         | -1.399482582 |
| CDS2       | -1.266463258 | SLN           | -1.39886606  |
| UGGT2      | -1.26644049  | CEACAM19      | -1.398622812 |
| AC021066.1 | -1.262823058 | ZDHHC22       | -1.398296295 |
| ROMO1      | -1.262617798 | CDCA5         | -1.398148249 |
| DPY30      | -1.262071007 | KIF5A         | -1.39306444  |
| ALG2       | -1.262064248 | USP12         | -1.393017011 |
| C21orf91   | -1.260758473 | C17orf85      | -1.392817653 |
| RPAIN      | -1.259313103 | RNF186        | -1.392626488 |
| PSMG3      | -1.257309475 | GLS2          | -1.391718029 |
| METTL14    | -1.256067935 | ADM2          | -1.391549928 |
| NLE1       | -1.255704259 | GLRA1         | -1.39120265  |
| PLDN       | -1.254998982 | RFC3          | -1.391106035 |

|           |                        |              |
|-----------|------------------------|--------------|
| EIF2S2    | -1.253613636 HIST1H1B  | -1.390959146 |
| SNAPC4    | -1.252507915 EIF2S2    | -1.389038266 |
| PSMC3     | -1.252237063 LSM2      | -1.388382414 |
| FCGR1A    | -1.250801945 UBASH3A   | -1.388123983 |
| C10orf111 | -1.250410155 GINS1     | -1.386895008 |
| ELMOD3    | -1.249168045 PCDH18    | -1.386154855 |
| PFND4     | -1.248643001 CLN6      | -1.385735235 |
| EIF3A     | -1.247652565 NSUN5     | -1.384773039 |
| GPN1      | -1.246678919 C5orf55   | -1.384724887 |
| MRPL53    | -1.246345719 MYLPF     | -1.384722044 |
| VMP1      | -1.245973445 SGCA      | -1.384606557 |
| C5orf62   | -1.245529521 CIRH1A    | -1.383945728 |
| ENTHD1    | -1.245322091 ACTR6     | -1.38346989  |
| C7orf23   | -1.245093698 FNBP4     | -1.383464816 |
| ANAPC4    | -1.243819302 SAFB      | -1.382666602 |
| C20orf111 | -1.242250028 ZXDC      | -1.381995699 |
| FAM118B   | -1.240759583 HAU51     | -1.381551871 |
| ZNF662    | -1.24014827 POM121     | -1.381439568 |
| ASXL3     | -1.24012825 C3orf71    | -1.381187345 |
| COPB2     | -1.240117622 NAALAD2   | -1.380921778 |
| REV3L     | -1.239474867 LGALS3BP  | -1.379993411 |
| EMC7      | -1.237474252 SMURF2    | -1.378588024 |
| PGP       | -1.237066107 FGF17     | -1.378469131 |
| ACTR6     | -1.237008101 DLG5      | -1.378430761 |
| CNPY2     | -1.236908843 SAE1      | -1.377958941 |
| CCDC58    | -1.236367735 EVX1      | -1.377129469 |
| DDX43     | -1.236336025 VPS13D    | -1.376473958 |
| NUP93     | -1.235748149 CST5      | -1.376150445 |
| MCM3AP    | -1.235507764 UTP14A    | -1.374721263 |
| POLE2     | -1.235250832 DUOX1     | -1.373580298 |
| PHTF2     | -1.234956081 MOCS3     | -1.373232039 |
| SERAC1    | -1.234566406 CRYGC     | -1.371555233 |
| SOD2      | -1.234331381 MED1      | -1.370418999 |
| SERPINH1  | -1.23380727 HIGD2A     | -1.370369165 |
| RFC3      | -1.233260688 C1D       | -1.370106538 |
| PLK1      | -1.233203838 OR51F1    | -1.369826586 |
| CD36      | -1.232948853 WDR38     | -1.369345635 |
| POLR1A    | -1.232242665 VTN       | -1.368899379 |
| RABGGTB   | -1.230581642 MRPL24    | -1.368804619 |
| GEMIN5    | -1.230490006 KDELR2    | -1.368235204 |
| COG1      | -1.229778648 COX6B2    | -1.367659662 |
| RPL24     | -1.228478564 C15orf26  | -1.367240793 |
| YBEY      | -1.227685906 CCDC74A   | -1.366619756 |
| SLC25A26  | -1.223487939 CALML6    | -1.366577799 |
| PKM       | -1.223253054 TXLNG     | -1.365995186 |
| AP2M1     | -1.222511508 PRPF38B   | -1.365813346 |
| DDX1      | -1.222329678 FAM171B   | -1.364097696 |
| NOD1      | -1.222163777 OR2V1     | -1.361959507 |
| ZW10      | -1.220811588 KIAA0586  | -1.361875388 |
| NAA50     | -1.219337957 CCNA2     | -1.36119112  |
| CEP152    | -1.217191245 GPR158    | -1.360513184 |
| ATAD1     | -1.21710062 SLCO1B7    | -1.360342489 |
| CDK9      | -1.216810421 RANBP1    | -1.359068915 |
| TRMT6     | -1.214842285 PIGS      | -1.359026633 |
| EIF4E     | -1.214767047 ARL4D     | -1.358847203 |
| YPEL1     | -1.214622995 TSSK6     | -1.358756483 |
| HEATR1    | -1.212823082 PARM1     | -1.358529964 |
| TXNRD3NB  | -1.212362854 COMMD3    | -1.358148481 |
| TRIAP1    | -1.211850501 TMEM97    | -1.357995121 |
| TOR1B     | -1.211612357 CTU2      | -1.35618708  |
| OR5AR1    | -1.211248944 SPAG17    | -1.355854461 |
| VPS36     | -1.210217087 RRH       | -1.355793945 |
| PIK3C3    | -1.209547893 DUSP27    | -1.355709242 |
| MAX       | -1.208188717 CDC45     | -1.355669646 |
| INO80E    | -1.208066348 GLIPR2    | -1.355630221 |
| STX18     | -1.207721724 PPP1R36   | -1.354665552 |
| SNRPG     | -1.205566222 PCDHB3    | -1.35424942  |
| CXorf36   | -1.204906269 DVL2      | -1.353664249 |
| ARPC4     | -1.203668806 SMEK2     | -1.353253501 |
| MIOS      | -1.203407099 CATSPERB  | -1.352848215 |
| FMOS      | -1.203239408 YME1L1    | -1.352625477 |
| RPA1      | -1.202357297 BSX       | -1.351907715 |
| RBMX      | -1.202132754 OR7C1     | -1.351017588 |
| VAC14     | -1.200270595 CTTNBP2NL | -1.350201785 |
| COASY     | -1.199434983 PSMC2     | -1.34990278  |
| TPR       | -1.199227411 CEP250    | -1.349774107 |
| IGBP1     | -1.194961933 CD70      | -1.349522814 |
| DIS3      | -1.193716642 NKAIN1    | -1.349086317 |
| CRKL      | -1.193291148 TRIM61    | -1.34874964  |
| IL36G     | -1.192801712 BRI3      | -1.348477965 |
| CUL2      | -1.192688233 BTF3L4    | -1.346826486 |
| POLRMT    | -1.192245098 SART3     | -1.345977605 |
| GCSH      | -1.191032683 LSS       | -1.345250492 |
| PDRG1     | -1.190777209 NDUFA7    | -1.344087552 |
| NRF1      | -1.190661017 FOXC2     | -1.343846067 |

|          |                        |              |
|----------|------------------------|--------------|
| EIF5     | -1.190554147 PPP2R3C   | -1.342320823 |
| LIPT1    | -1.189385756 EIF3H     | -1.341234842 |
| DTYMK    | -1.189362568 GRPEL1    | -1.340914975 |
| C11orf10 | -1.187078268 TTC30A    | -1.340200386 |
| RPS8     | -1.185370569 ZFYVE20   | -1.339636254 |
| AP2B1    | -1.183349851 TRIAP1    | -1.339070801 |
| ELAC2    | -1.183255107 CFHR4     | -1.339041868 |
| USP24    | -1.18298842 RILPL1     | -1.338786857 |
| TRAPP11  | -1.182986448 NEK7      | -1.338619307 |
| LAS1L    | -1.182768104 YIPF3     | -1.338477848 |
| ORC6     | -1.182407257 H1FNT     | -1.338271675 |
| ATP6VOD1 | -1.181753715 RPL37A    | -1.338252799 |
| PSMB6    | -1.180012028 GPR125    | -1.33796122  |
| CENPW    | -1.178819363 CYP39A1   | -1.335737633 |
| RAN      | -1.178639669 HIST1H2AB | -1.335236803 |
| ARGLU1   | -1.177706953 CCDC28B   | -1.333231002 |
| ZWINT    | -1.177622511 HIST1H2AA | -1.331941737 |
| CD2      | -1.17577558 CEACAM5    | -1.331889985 |
| RPAP3    | -1.174222309 TCHHL1    | -1.331605136 |
| PPP1R37  | -1.169861545 DOK1      | -1.331588865 |
| BCAS2    | -1.169813503 RPL10     | -1.330485089 |
| NR2C2AP  | -1.169190743 DUSP12    | -1.330474476 |
| GINS3    | -1.168900802 PSMA6     | -1.329932606 |
| CTU1     | -1.168672797 FOXF2     | -1.329367582 |
| PFDN2    | -1.168490662 TPT1      | -1.329212127 |
| CCT6B    | -1.166890337 FAM75A1   | -1.327873728 |
| DCLRE1B  | -1.165112882 MYPN      | -1.326591013 |
| THAP1    | -1.164708443 C12orf76  | -1.325023563 |
| EPHB6    | -1.164094347 DHH       | -1.324505465 |
| C12orf50 | -1.163923228 ACTL6A    | -1.324089056 |
| SRM      | -1.162425297 PITPNB    | -1.323550188 |
| CCT6A    | -1.161600828 SNRPF     | -1.322855177 |
| CNIH4    | -1.161143723 CCR7      | -1.322225566 |
| VCL      | -1.160033322 PADI4     | -1.322023506 |
| TIPRL    | -1.159975204 RBPMS     | -1.321787351 |
| EXOSC1   | -1.159391695 SLC38A5   | -1.321627333 |
| GINS2    | -1.159330215 ASH2L     | -1.321380735 |
| POLR2G   | -1.159291555 C11orf87  | -1.320546465 |
| SMU1     | -1.158961843 USP3      | -1.319967007 |
| TAF1C    | -1.158389693 ZNF259    | -1.319516798 |
| ATP10B   | -1.155904663 ZBTB34    | -1.319356965 |
| EIF5A    | -1.155231855 PDE6C     | -1.318981816 |
| PSMD14   | -1.15495698 C15orf63   | -1.318881749 |
| TARS     | -1.154929744 SUSD3     | -1.318679868 |
| SIAE     | -1.154924856 TUBG1     | -1.318445333 |
| CIAO1    | -1.152202616 CPSF4L    | -1.317067473 |
| VPS4A    | -1.151884009 RBM28     | -1.316596094 |
| RBBP6    | -1.151745314 EEF2      | -1.315436524 |
| DHX9     | -1.151186658 OR7D4     | -1.31497022  |
| POLD3    | -1.150523831 SRCAP     | -1.313693399 |
| UQCC     | -1.150131829 RPL36     | -1.313347615 |
| RRP9     | -1.148982525 OR6B1     | -1.311657279 |
| MRC1     | -1.148911799 UBQLN4    | -1.310950948 |
| MAP3K2   | -1.148652316 39880     | -1.310145651 |
| RQCD1    | -1.148569283 SH3TC1    | -1.309541761 |
| SF3A2    | -1.148353051 TTC36     | -1.308622776 |
| TMED3    | -1.147828583 C11orf35  | -1.307697103 |
| PRPF4    | -1.147629016 DNAJC17   | -1.307558425 |
| CTDSP2   | -1.14696236 WDR91      | -1.307428734 |
| KHSRP    | -1.14691668 RGS9       | -1.307422463 |
| RPL36    | -1.146558928 C12orf75  | -1.307402341 |
| EXOSC10  | -1.146338594 C6orf89   | -1.307252925 |
| MRPS18C  | -1.146127592 AGTR2     | -1.306679621 |
| NFS1     | -1.142463597 ATP2B3    | -1.306345401 |
| SGSM3    | -1.140855098 SNRNP200  | -1.306334581 |
| MRPL36   | -1.14048396 FKBPL      | -1.306307148 |
| RPL19    | -1.140146421 KCNJ15    | -1.306238033 |
| C1orf228 | -1.139447078 PRKCH     | -1.306146129 |
| CCT8     | -1.137811964 EID2      | -1.305751897 |
| ACO2     | -1.137710016 UBL4B     | -1.304917945 |
| MFAP1    | -1.13741397 KDM1A      | -1.304656676 |
| FERMT2   | -1.136351485 BHLHA9    | -1.304141607 |
| S100G    | -1.136310018 MEF2B/BNB | -1.303573291 |
| FXN      | -1.135711566 PPFIA4    | -1.303480594 |
| NME5     | -1.13560789 SLC4A1     | -1.303428597 |
| KLF1     | -1.135604126 CNPY2     | -1.302819574 |
| EIF3B    | -1.135426481 GPR85     | -1.302577615 |
| SLC35D1  | -1.135048079 C17orf81  | -1.301560659 |
| TSEN34   | -1.133407996 TIMM22    | -1.300694924 |
| FAM185A  | -1.133299596 LMOD3     | -1.299696123 |
| YARS2    | -1.132928814 TDO2      | -1.298072075 |
| VN1R2    | -1.132829488 SRSF7     | -1.297876366 |
| SETDB1   | -1.132566535 H2BFM     | -1.297338338 |
| ARIH1    | -1.131807267 PPP2R5D   | -1.296608003 |
| VPS13D   | -1.129654371 RNF168    | -1.295142446 |

|             |              |           |              |
|-------------|--------------|-----------|--------------|
| ANAPC1      | -1.127929837 | WDR88     | -1.295032877 |
| C16orf72    | -1.126826866 | DSC3      | -1.295010072 |
| WWTR1       | -1.126787364 | GJA9      | -1.293636712 |
| CEBPZ       | -1.126574933 | TCFL5     | -1.293523283 |
| TCEB2       | -1.124750634 | C3orf25   | -1.293387208 |
| NDUFA2      | -1.124713541 | CCL13     | -1.292596661 |
| STX5        | -1.124386769 | BEGAIN    | -1.292257661 |
| RPL5        | -1.123550445 | DUSP21    | -1.291745466 |
| U2AF1L4     | -1.12303907  | TBX5      | -1.291047766 |
| FARSA       | -1.122975506 | GTPBP4    | -1.290879142 |
| MAT2A       | -1.12249972  | FBXW4     | -1.290656771 |
| CCDC101     | -1.12247241  | TRAF3IP3  | -1.289221532 |
| NBR1        | -1.122159404 | LAIR2     | -1.289006794 |
| S100BPB     | -1.120559064 | CCDC17    | -1.288946689 |
| PSMD2       | -1.120410134 | NSUN6     | -1.288379213 |
| CIT         | -1.12012829  | HSD17B7   | -1.287990136 |
| TUBGCP4     | -1.119913794 | SIGLEC15  | -1.286365988 |
| POLG2       | -1.119353373 | YPEL1     | -1.285892981 |
| MASTL       | -1.119162982 | C12orf71  | -1.284890782 |
| PSMC5       | -1.116680643 | RPS18     | -1.284861476 |
| TRA2B       | -1.116641119 | PAQR3     | -1.284117989 |
| FUS         | -1.115787787 | PRPF6     | -1.283508664 |
| LMLN        | -1.115653475 | HSPA8     | -1.283421376 |
| XRCC4       | -1.115385414 | PLS1      | -1.283356689 |
| XPO1        | -1.115279503 | FXVD7     | -1.283150611 |
| KRTCAP2     | -1.113876033 | OR10A7    | -1.283133705 |
| C19orf69    | -1.113102098 | ID11      | -1.282895812 |
| RRP1B       | -1.11248171  | PRRC2A    | -1.28242491  |
| SLC25A3     | -1.111489522 | NDNL2     | -1.281118975 |
| TCP1        | -1.111045616 | SYNGR2    | -1.280972586 |
| TNFSF12-TNF | -1.110535589 | ADO       | -1.280890515 |
| PHFA        | -1.110430938 | C7orf50   | -1.280705584 |
| ACTR2       | -1.110401685 | NKD2      | -1.280529982 |
| PRMT5       | -1.110228976 | RBFox3    | -1.280326165 |
| NUDCD3      | -1.110181528 | AIDA      | -1.280056233 |
| SPTLC1      | -1.109882016 | RPS5      | -1.279801141 |
| SLC6A20     | -1.10960873  | MMS22L    | -1.279507467 |
| NSA2        | -1.108398885 | THUMPD2   | -1.278957779 |
| EIF1AX      | -1.107846414 | RBM39     | -1.278334778 |
| CFHR4       | -1.107841871 | CLCF1     | -1.278317998 |
| ATG5        | -1.106912764 | BLOC1S3   | -1.278020097 |
| SRCAP       | -1.106872561 | C14orf102 | -1.277830268 |
| HAUS1       | -1.10619977  | SHC2      | -1.277777602 |
| NGAMT1      | -1.105902466 | PIEZO1    | -1.277394418 |
| ATR         | -1.105837161 | FBXO22    | -1.277239442 |
| AHSA2       | -1.105334266 | SCTR      | -1.276928082 |
| EIF3E       | -1.104727511 | POLR1B    | -1.274172151 |
| SPHAR       | -1.104417387 | IMPDH1    | -1.271891241 |
| UBLCP1      | -1.104115654 | TRAF3IP1  | -1.271830307 |
| MRPL13      | -1.103021585 | RBM12B    | -1.271554476 |
| RPLP2       | -1.102899636 | BUD31     | -1.271033674 |
| SLC39A7     | -1.102517103 | FANCM     | -1.270720506 |
| TRIM59      | -1.101629427 | TGFB1     | -1.270325791 |
| UQCRCF51    | -1.101448558 | FAHD2B    | -1.270249913 |
| DR1         | -1.101431414 | DNAJC4    | -1.270196078 |
| CKAP2       | -1.100557384 | EIF1      | -1.269589844 |
| TAF5        | -1.100398036 | SLC11A1   | -1.268889719 |
| SRSF1       | -1.100306853 | CHD4      | -1.268686586 |
| FBXW11      | -1.100215742 | RPS9      | -1.268593949 |
| VPS28       | -1.099537324 | SPATA6    | -1.268105502 |
| PGM5        | -1.099134342 | PI4K2B    | -1.267829829 |
| F11         | -1.099064319 | TCF3      | -1.267404331 |
| NUPL1       | -1.09900294  | MMGT1     | -1.266883109 |
| PMPCB       | -1.098865487 | LILRA3    | -1.266264471 |
| UFM1        | -1.098637778 | OR5C1     | -1.265249631 |
| PHB2        | -1.098532471 | RBBP4     | -1.264947428 |
| HMGCR       | -1.09752676  | ISM1      | -1.264866462 |
| SMG1        | -1.097265312 | KPNB1     | -1.264830663 |
| ZNF687      | -1.09657735  | SSTR1     | -1.26426376  |
| DCTN5       | -1.096499524 | TGM7      | -1.264152913 |
| PPP2R1A     | -1.096393988 | C9orf16   | -1.261885101 |
| KIAA0586    | -1.095557469 | PAPPA     | -1.261561488 |
| CCT4        | -1.094423341 | PNPLA6    | -1.261024012 |
| EMC6        | -1.092820255 | CLDN25    | -1.260772739 |
| RPP21       | -1.092777508 | CCDC135   | -1.260731285 |
| IPO11       | -1.092724416 | ELAC2     | -1.260434805 |
| NFYB        | -1.091286106 | RPL37     | -1.260333546 |
| EIF4ENIF1   | -1.089089412 | MUSK      | -1.259842432 |
| C9orf114    | -1.08779364  | NANOGNB   | -1.259692167 |
| LSM11       | -1.086214526 | SLC6A12   | -1.259572819 |
| VRK1        | -1.085903324 | ATP5I     | -1.257875017 |
| TBC1D8B     | -1.085879458 | OR511     | -1.257011177 |
| MNAT1       | -1.085864628 | TMEM108   | -1.256942661 |
| NDNL2       | -1.085694726 | GUSB      | -1.256846011 |
| BBX         | -1.084538793 | KIAA0907  | -1.256773131 |



|             |              |              |              |
|-------------|--------------|--------------|--------------|
| SEC61B      | -1.084477868 | CALML3       | -1.256468225 |
| OR5H14      | -1.083994931 | CXorf69      | -1.256375774 |
| ACTL6B      | -1.083909903 | SLC6A7       | -1.255921349 |
| RCL1        | -1.08390836  | RSPH6A       | -1.25582562  |
| CSF3R       | -1.083676018 | UBR5         | -1.254988844 |
| NOP14       | -1.083433165 | FLT3LG       | -1.254392482 |
| RPL18       | -1.082684121 | TOR1B        | -1.252985237 |
| MMS22L      | -1.081960406 | PCF11        | -1.252952564 |
| UBA52       | -1.081345178 | TAZ          | -1.252841935 |
| SMG7        | -1.08026779  | GPR6         | -1.252350231 |
| C10orf2     | -1.079750514 | METTL24      | -1.252115773 |
| INTS4       | -1.078930568 | IRF2BP1      | -1.250916795 |
| FAM193B     | -1.078919565 | PTPRCAP      | -1.250840383 |
| PRMT1       | -1.078538807 | HOXC12       | -1.250203552 |
| DNM1L       | -1.078189135 | NCL          | -1.249314414 |
| POTEG       | -1.077913378 | HS3ST4       | -1.249259524 |
| RPE         | -1.077516895 | PPAN         | -1.249103141 |
| ALG11       | -1.076921234 | PAF1         | -1.249100724 |
| NCOA6       | -1.076214389 | IL17F        | -1.249081312 |
| HNRNPC      | -1.075667291 | RAB1B        | -1.24893481  |
| DEF8        | -1.07564974  | C14orf182    | -1.248906915 |
| POLR2F      | -1.075425174 | ABCA2        | -1.247666282 |
| EXOC7       | -1.075263175 | SGSH         | -1.246684444 |
| TLCD1       | -1.075185546 | ARID5B       | -1.246500494 |
| PPP2R3C     | -1.074589668 | GABPA        | -1.245979186 |
| CCDC80      | -1.073109498 | FAM110C      | -1.245498786 |
| HYOU1       | -1.072267629 | HDAC3        | -1.245107157 |
| PXDN        | -1.072229736 | SLFN1        | -1.244651245 |
| PRPF19      | -1.071373607 | NUF2         | -1.244465095 |
| TXN2        | -1.071195412 | MCM10        | -1.243457887 |
| NUBP2       | -1.070243769 | SKP1         | -1.24308702  |
| MPDU1       | -1.069829362 | OR11G2       | -1.243033762 |
| LIMS1       | -1.068624485 | FCGR1A       | -1.242907399 |
| TDGF1       | -1.068623975 | SLC52A3      | -1.241971506 |
| ABCB7       | -1.068075668 | ARL11        | -1.24181862  |
| RAB5A       | -1.06710304  | ENDOG        | -1.241603576 |
| GTF2A2      | -1.066927423 | ZMIZ1        | -1.240752857 |
| PRPF6       | -1.066762079 | CCDC64B      | -1.240671479 |
| ECD         | -1.066306395 | CXCR6        | -1.240561222 |
| LSG1        | -1.066166811 | PKD2L1       | -1.23962038  |
| RCC1        | -1.065960233 | ADAM23       | -1.239416475 |
| ATP5I       | -1.065074601 | LCA5L        | -1.239150196 |
| SERPINE2    | -1.061809596 | POLR3H       | -1.238997098 |
| EIF5B       | -1.061589138 | RPIA         | -1.238667289 |
| PMM2        | -1.061509898 | EGR1         | -1.238577588 |
| HCFC1       | -1.060512155 | UBA3         | -1.237905617 |
| PPP1R10     | -1.059547758 | CHERP        | -1.237857017 |
| BAI3        | -1.059330662 | RNF24        | -1.237140122 |
| SNRNP48     | -1.059000499 | PDCL3        | -1.237007234 |
| PABPN1      | -1.058415348 | UFD1L        | -1.236799288 |
| GFM2        | -1.057955433 | RAN          | -1.236747906 |
| EPS15L1     | -1.057193106 | ADORA1       | -1.236481798 |
| RPS4X       | -1.057139324 | CELA1        | -1.236286873 |
| BARD1       | -1.05653207  | C7orf23      | -1.236025047 |
| GS1-211B7.1 | -1.055638252 | RBBP5        | -1.235719984 |
| RANBP3L     | -1.055603566 | HOXD9        | -1.235074569 |
| C19orf43    | -1.055590894 | NPFF         | -1.234690934 |
| PSMA4       | -1.054967252 | CUL1         | -1.234042029 |
| CDC16       | -1.054451543 | C2orf84      | -1.233967522 |
| SFSWAP      | -1.054306701 | TRIM4        | -1.233856391 |
| RER1        | -1.053547878 | ZKSCAN2      | -1.233848704 |
| BOD1L1      | -1.053227865 | CEBPZ        | -1.233787188 |
| FPGT        | -1.052739242 | TRAF4        | -1.233764083 |
| G6PD        | -1.052583161 | PRPF38A      | -1.233432633 |
| MBD6        | -1.051540404 | RP4-725G10.1 | -1.233421201 |
| TIRAP       | -1.051294407 | MCL1         | -1.2331853   |
| FLI1        | -1.050933914 | C11orf52     | -1.230877202 |
| KIF11       | -1.050846083 | SHROOM1      | -1.230429373 |
| GIN51       | -1.050225728 | KDM5A        | -1.230174275 |
| ATP5B       | -1.049973223 | AKR1C2       | -1.228724497 |
| GNL2        | -1.049765519 | PLEKHG4      | -1.228060686 |
| MRPL12      | -1.049447717 | POLR3B       | -1.227057585 |
| CHMP3       | -1.049124508 | PIGY         | -1.227016347 |
| PWP2        | -1.049006238 | PYGO2        | -1.226863313 |
| PPP4C       | -1.048409595 | TWSG1        | -1.226773792 |
| ZNF513      | -1.047739956 | C1orf158     | -1.226411543 |
| AKIRIN2     | -1.046196936 | ABHD15       | -1.226344221 |
| C15orf42    | -1.046178886 | PLLP         | -1.225999885 |
| ZFC3H1      | -1.045841485 | PDCD7        | -1.225947903 |
| CHKA        | -1.045756653 | HIGD1A       | -1.225303705 |
| MAPK10      | -1.045274203 | VN1R2        | -1.224415174 |
| LAMA2       | -1.044167976 | OR1L3        | -1.223408953 |
| UTP3        | -1.042571135 | C3orf33      | -1.223260954 |
| MED11       | -1.04114091  | ANO1         | -1.223137022 |
| RPRD1B      | -1.040728493 | RBMX         | -1.222987895 |

|          |                          |              |
|----------|--------------------------|--------------|
| AWAT1    | -1.040684879 DZIP1       | -1.222901383 |
| RBM39    | -1.04067574 DOCK5        | -1.222322295 |
| MCMBP    | -1.040424041 KCTD10      | -1.221109248 |
| ZNHIT6   | -1.039714905 UBL7        | -1.220450127 |
| CENPH    | -1.039411904 KCTD3       | -1.219907579 |
| HAUS5    | -1.039171405 PMF1        | -1.219794741 |
| KIAA1731 | -1.039098244 PYGL        | -1.21943985  |
| RABGEF1  | -1.038855914 TRIP13      | -1.219009527 |
| ENOPH1   | -1.038800689 ALKBH3      | -1.218969454 |
| FANCM    | -1.038460637 GSTA1       | -1.218703181 |
| FPGS     | -1.038400291 JMJD8       | -1.218210725 |
| EFCAB4A  | -1.038199677 PNMA1       | -1.217902567 |
| DNAJC17  | -1.038010644 PAX4        | -1.217814145 |
| ASB11    | -1.036929888 PTAR1       | -1.217028717 |
| ORC3     | -1.03682261 PMM1         | -1.216559665 |
| MTOR     | -1.035784209 GINS2       | -1.216551298 |
| HAUS3    | -1.03550743 ALDH3B2      | -1.216469875 |
| CHMP2A   | -1.034698839 TULP3       | -1.216324414 |
| SPICE1   | -1.03438403 ARL3         | -1.216315431 |
| COP56    | -1.034307376 GCGR        | -1.215878806 |
| ZNHIT2   | -1.033205846 HAUS5       | -1.215854539 |
| SNRNP25  | -1.03234706 RPS15A       | -1.21583725  |
| RPS13    | -1.032046119 PDAP1       | -1.215830382 |
| M6PR     | -1.031904362 ATP5B       | -1.215816343 |
| GUF1     | -1.031816394 RABEP2      | -1.214264623 |
| C3orf67  | -1.030683122 P2RX1       | -1.213876172 |
| PPP1R12A | -1.02965238 RDBP         | -1.213758401 |
| RPL28    | -1.029185679 FKBP1A      | -1.213560915 |
| C21orf59 | -1.028385996 HIST1H2AD   | -1.213480645 |
| RAB6C    | -1.02779821 RAD18        | -1.213377205 |
| WARS     | -1.027713458 GTF3C2      | -1.213167613 |
| TDO2     | -1.027643685 SLC43A3     | -1.213037935 |
| CNKSR2   | -1.027506652 NAA40       | -1.212609012 |
| TUBB     | -1.027459775 SNRNP70     | -1.212520924 |
| CISD2    | -1.026484231 DEFB1       | -1.212123838 |
| SKA1     | -1.026374844 AP3M1       | -1.211835974 |
| IL32     | -1.025804163 ACAN        | -1.211816439 |
| PARP14   | -1.023925458 C2orf66     | -1.210920926 |
| BRAT1    | -1.023290534 GRPR        | -1.210663229 |
| OR2A5    | -1.023199598 AURKA       | -1.210453093 |
| ATP6V0B  | -1.023178105 KTI12       | -1.210192529 |
| HINFP    | -1.022734346 MAPK1       | -1.209830295 |
| KCTD15   | -1.021975211 OR2V2       | -1.209764782 |
| NDUFB2   | -1.021247536 C16orf48    | -1.209577881 |
| PBRM1    | -1.021207796 ARL2        | -1.209176992 |
| ANXA10   | -1.020889365 PRR14       | -1.208238549 |
| NOP10    | -1.020826147 ZC3H15      | -1.20763772  |
| TMEM106B | -1.020700587 RBBP9       | -1.207494145 |
| NOP58    | -1.019570934 JRKL        | -1.207250525 |
| TMX2     | -1.018594261 TLE4        | -1.206517106 |
| PSMD8    | -1.01767613 DUS3L        | -1.206353618 |
| EIF2B1   | -1.017493236 ZBTB5       | -1.205970284 |
| PTPDC1   | -1.014494149 MRPS17      | -1.205828906 |
| MMD2     | -1.014114046 MYPOP       | -1.205188753 |
| HEATR7B2 | -1.013780521 ADRB3       | -1.205153273 |
| STXBP3   | -1.013247945 POU6F1      | -1.205067176 |
| TOMM22   | -1.012558371 ASPDH       | -1.204316403 |
| CEP192   | -1.012469221 U2AF1       | -1.203610591 |
| HAUS7    | -1.011401537 GMEB2       | -1.203026471 |
| OVGP1    | -1.01054944 MGST1        | -1.202845243 |
| SCD      | -1.009733678 ALG2        | -1.202776548 |
| MRPS16   | -1.009396417 SMURF1      | -1.202329155 |
| RFT1     | -1.009339903 TTC16       | -1.20179783  |
| SEPHS2   | -1.008627614 RHOD        | -1.201014791 |
| LRMP     | -1.008251055 MFAP1       | -1.200742731 |
| TSPAN33  | -1.007460428 SFSWAP      | -1.200478122 |
| MED26    | -1.00731284 MAX          | -1.200087952 |
| NCAPG    | -1.006836369 NHP2L1      | -1.199623442 |
| PPCDC    | -1.006405797 PRDX1       | -1.199068532 |
| CSTL1    | -1.005623976 SAYSD1      | -1.1987253   |
| RRP8     | -1.005554672 MGEA5       | -1.198453769 |
| HNRPDL   | -1.005407422 OR8H1       | -1.198218642 |
| TOR1AIP2 | -1.004804503 ABR         | -1.19759339  |
| SMC5     | -1.00450648 MCM3AP       | -1.197466411 |
| LRRC55   | -1.004111456 FBXL17      | -1.196987742 |
| C19orf52 | -1.004058784 RPS2        | -1.19681493  |
| PARN     | -1.00373213 RP4-811H24.6 | -1.196547503 |
| ARPC3    | -1.002802732 RPL27A      | -1.196479726 |
| DDB1     | -1.001257599 ZBTB17      | -1.196076621 |
| WDR33    | -1.000650574 HELZ        | -1.196045885 |
| LCE1A    | -1.000021373 IL10RA      | -1.195419237 |
| U2AF1    | -1.00001316 SRRM2        | -1.195138055 |
| HSDL2    | -0.99953368 RPP21        | -1.194847512 |
| CCNYL1   | -0.999129699 ARID5A      | -1.194303294 |
| ZNHIT1   | -0.999059485 TRMT6       | -1.193704371 |

|           |              |           |              |
|-----------|--------------|-----------|--------------|
| ORC5      | -0.999022729 | GLYR1     | -1.193375028 |
| TAF7      | -0.998960964 | TSR2      | -1.193336722 |
| HORMAD2   | -0.998922287 | RELL1     | -1.192137068 |
| BFSP1     | -0.997408668 | ISG20     | -1.19202823  |
| STT3A     | -0.996413479 | BRWD3     | -1.191959771 |
| NDOR1     | -0.996169109 | HSPD1     | -1.191481897 |
| RRP15     | -0.995951965 | WDR55     | -1.19100909  |
| HM13      | -0.99565163  | CGNL1     | -1.190965918 |
| MCM6      | -0.99521859  | TMEM99    | -1.190704403 |
| CCDC99    | -0.992692391 | LSM11     | -1.190349618 |
| CHPF2     | -0.992254578 | GATA2     | -1.190148311 |
| GLRA1     | -0.992025418 | KRT34     | -1.189748177 |
| TTC37     | -0.991617863 | RG59BP    | -1.188853876 |
| FAM98B    | -0.991481224 | KCTD11    | -1.188848339 |
| NAA38     | -0.991438467 | FARSA     | -1.188748461 |
| DHDD5     | -0.988691739 | PES1      | -1.188565898 |
| GTPBP2    | -0.988589701 | KRTAP19-8 | -1.188438649 |
| CLEC2L    | -0.987481869 | PGP       | -1.188016303 |
| ATMIN     | -0.98739107  | SSH1      | -1.18739853  |
| MTRNR2L3  | -0.986897737 | KRT75     | -1.187200015 |
| PEA15     | -0.985880842 | HIST3H2A  | -1.186323206 |
| NDC80     | -0.98584922  | PPM1D     | -1.186030197 |
| POLR2A    | -0.985787997 | COX7A2    | -1.18513762  |
| DDX39B    | -0.985042674 | RADIL     | -1.185009391 |
| RNF224    | -0.984658566 | ABHD12B   | -1.184327384 |
| METTL23   | -0.984552151 | SLC7A6    | -1.183846881 |
| C11orf58  | -0.983361828 | ZFXH3     | -1.183840398 |
| GABPB2    | -0.982871152 | ELP3      | -1.183438845 |
| MCF2L     | -0.982605638 | KIF20A    | -1.182917249 |
| ERAL1     | -0.981807872 | C16orf54  | -1.181264225 |
| HUWE1     | -0.981603706 | PACSIN3   | -1.181015708 |
| HECTD3    | -0.981147627 | DYNLL1    | -1.180939788 |
| SCAP      | -0.981101285 | USP40     | -1.180477424 |
| IMP3      | -0.98032947  | SORCS2    | -1.179876485 |
| IFRD1     | -0.980315771 | KRT6B     | -1.179807981 |
| CSNK1D    | -0.980279306 | ACTA2     | -1.179634896 |
| CHCHD1    | -0.979858879 | GNMT      | -1.178859953 |
| ZNF596    | -0.979802333 | SCUBE1    | -1.178794037 |
| GKAP1     | -0.978385757 | DPM2      | -1.178333695 |
| DDX21     | -0.978364079 | ASB14     | -1.178204751 |
| MYC       | -0.976957246 | C17orf28  | -1.177601279 |
| LRR1      | -0.976572281 | C19orf69  | -1.177499613 |
| GART      | -0.975986622 | ADIPOR1   | -1.17704494  |
| RTTN      | -0.975004871 | DEFB4A    | -1.177042772 |
| SLC7A1    | -0.974823835 | RPA3      | -1.17610571  |
| PDCD7     | -0.974538454 | C22orf15  | -1.175284917 |
| MRPS35    | -0.974029897 | SALL4     | -1.17474053  |
| KRT71     | -0.973981095 | USP1      | -1.174349639 |
| PSIP1     | -0.973643021 | TRIM68    | -1.173558611 |
| ZMYND11   | -0.973034439 | RFXAP     | -1.172835458 |
| TFB2M     | -0.972935954 | ZNF513    | -1.172789767 |
| RPL29     | -0.971958171 | C12orf39  | -1.172351943 |
| OSGEP     | -0.971890991 | DDX23     | -1.17190298  |
| AGPS      | -0.971461161 | COQ3      | -1.17111272  |
| WDR18     | -0.970454648 | SUPT6H    | -1.17109365  |
| SUGP1     | -0.970082497 | CHCHD6    | -1.170420985 |
| KDM4B     | -0.969836749 | CTNBNB1   | -1.169866122 |
| CCDC86    | -0.969745821 | TMEM14C   | -1.169789864 |
| GTF2H5    | -0.969218429 | DIABLO    | -1.169779046 |
| CAPN9     | -0.968995126 | SLC2A12   | -1.169624174 |
| DCTN6     | -0.968546036 | ACTL6B    | -1.169372636 |
| RNASEH2C  | -0.968090028 | SHD       | -1.168908091 |
| HIST2H3D  | -0.967550433 | VPS26B    | -1.16833126  |
| RPL27     | -0.967489478 | GGTLC1    | -1.168228071 |
| ZNF407    | -0.96713655  | EVL       | -1.168155498 |
| GINS4     | -0.966658728 | RNF133    | -1.16814253  |
| ACSM4     | -0.966503553 | FAM63B    | -1.167835578 |
| SLC7A4    | -0.966347303 | ATAD3B    | -1.167526301 |
| ZBBX      | -0.966340595 | MFSD5     | -1.166900503 |
| OR52E2    | -0.965484195 | FAM209B   | -1.166659981 |
| C15orf41  | -0.965187476 | SOX3      | -1.1660714   |
| GJC1      | -0.964735678 | FAM183A   | -1.165952272 |
| SLC25A5   | -0.964460262 | RG510     | -1.165285654 |
| HNRNPCL1  | -0.962960756 | CCDC125   | -1.165112361 |
| HNRNPA2B1 | -0.961640683 | TMEM230   | -1.164754052 |
| HELZ      | -0.961255936 | TM6SF2    | -1.164689242 |
| HNRNPD    | -0.961148313 | PHC3      | -1.164345153 |
| SNX22     | -0.960965128 | ALG8      | -1.1636855   |
| ANKLE2    | -0.960584879 | RPL38     | -1.163530585 |
| WDR24     | -0.960325608 | SMC5      | -1.162725855 |
| ATP6V1H   | -0.960046498 | TECRL     | -1.162608446 |
| RPS6      | -0.959802418 | INSM2     | -1.162511608 |
| ARPC2     | -0.959198251 | ANKFN1    | -1.162254029 |
| MRPL27    | -0.958820312 | HIST3H3   | -1.161849667 |
| COA5      | -0.95865868  | MEGF10    | -1.161822231 |

|             |              |             |              |
|-------------|--------------|-------------|--------------|
| OR13C5      | -0.958613032 | ALG10       | -1.160699223 |
| PAD14       | -0.957924378 | DKKL1       | -1.160593167 |
| PRPF38A     | -0.95763203  | MPV17L      | -1.160523288 |
| C8orf82     | -0.957027162 | SS18L2      | -1.160401447 |
| TOP2A       | -0.956991206 | TMEM120B    | -1.160003583 |
| USP39       | -0.954340951 | TMEM109     | -1.159426773 |
| WDR70       | -0.952987464 | ORS2H1      | -1.159077488 |
| BRCA2       | -0.952182964 | PLA2G2E     | -1.158794855 |
| MCM2        | -0.951805581 | ANKMY2      | -1.158296055 |
| IER5        | -0.951797441 | FOXO4L1     | -1.158115705 |
| AHSA1       | -0.951408637 | SH2D3A      | -1.157904008 |
| GEMIN7      | -0.951372303 | CRTAP       | -1.157674178 |
| EED         | -0.950724816 | MARCKS      | -1.15760582  |
| SMAD4       | -0.950573159 | DDX46       | -1.157570195 |
| MESDC2      | -0.950053433 | RPL13       | -1.157504332 |
| SLC22A25    | -0.949922009 | FAM216B     | -1.157183413 |
| NSMCE1      | -0.949292453 | PPP4R2      | -1.157119162 |
| BAP1        | -0.948836345 | TSPAN16     | -1.157094764 |
| TMEM237     | -0.948441404 | UTP6        | -1.156869212 |
| NEU3        | -0.948069192 | PI3         | -1.156510368 |
| TEN1        | -0.94697411  | BRSK1       | -1.155649364 |
| SYS1        | -0.946634416 | TNNC2       | -1.15556236  |
| TMED10      | -0.946277895 | CCDC19      | -1.155391718 |
| KLF4        | -0.946216742 | FLYWCH2     | -1.155383306 |
| S100A10     | -0.94576215  | PTCH1       | -1.155025182 |
| C11orf57    | -0.945597045 | SHISA7      | -1.154703726 |
| FAM204A     | -0.945399507 | KDM4C       | -1.154270933 |
| UBL5        | -0.945324581 | ARHGAP36    | -1.15423169  |
| METTL16     | -0.945208816 | YDJC        | -1.154229712 |
| GTF3C1      | -0.945069331 | SPTLC1      | -1.154192067 |
| ASNS        | -0.944760908 | HMMH1       | -1.153717498 |
| PKMYT1      | -0.94465765  | TNNT3       | -1.153541832 |
| MRPL44      | -0.943978471 | TTC27       | -1.15316121  |
| NUP35       | -0.943646315 | IL6R        | -1.153125602 |
| PPYR1       | -0.943328666 | SYVN1       | -1.152995283 |
| SMG5        | -0.942586637 | CTNNBIP1    | -1.152695365 |
| RNF217      | -0.941885759 | CRLF3       | -1.152200608 |
| CPSF4       | -0.941442272 | SYCE2       | -1.152198016 |
| AKAP10      | -0.940566385 | KIF12       | -1.152077246 |
| WEE1        | -0.939097678 | GEMIN4      | -1.151734538 |
| C3orf77     | -0.937721113 | USP54       | -1.151450973 |
| LGALS9C     | -0.937476407 | RNPEP       | -1.151140802 |
| SUZ12       | -0.937098269 | CATSPER1    | -1.151075373 |
| PSMA7       | -0.936080385 | LYSMD4      | -1.150886339 |
| ALDOA       | -0.935866715 | PLOD1       | -1.150877531 |
| PAK1IP1     | -0.935775537 | SHROOM2     | -1.150659978 |
| SYMPK       | -0.935542469 | C2orf69     | -1.150544498 |
| GNL3L       | -0.935536653 | SYCN        | -1.150379088 |
| TXNDC9      | -0.935104271 | PABPN1      | -1.150224404 |
| UBE3D       | -0.935012347 | TARS        | -1.149025971 |
| GLYCTK      | -0.93464153  | NUPL1       | -1.148997097 |
| SLC3A2      | -0.934296036 | MAN2B2      | -1.148385262 |
| TAF7L       | -0.933546227 | CRYAA       | -1.148277098 |
| SMS         | -0.933386778 | NDST2       | -1.147847842 |
| SAFB        | -0.933374052 | MRPL36      | -1.14754419  |
| RP11-466G1: | -0.932142451 | OAS2        | -1.147355516 |
| MLKL        | -0.931947868 | KRT20       | -1.147237746 |
| C18orf21    | -0.931878495 | RAX         | -1.146544905 |
| CENPA       | -0.931850229 | MED22       | -1.14647268  |
| SMARCB1     | -0.931804265 | PCDH8       | -1.146301319 |
| RIOK1       | -0.931217515 | EXOSC5      | -1.146019271 |
| POP5        | -0.930830015 | MTHFD2      | -1.145860082 |
| SCAF11      | -0.930571845 | TMPRSS11BNL | -1.145855673 |
| SLC44A2     | -0.930391388 | THBD        | -1.145684107 |
| GRWD1       | -0.930200191 | TCOF1       | -1.145635716 |
| DMAP1       | -0.929531228 | LCP2        | -1.14563327  |
| VRTN        | -0.929439281 | DDX5        | -1.145354266 |
| NARFL       | -0.929338565 | CFI         | -1.145305361 |
| RNF135      | -0.928162601 | SERAC1      | -1.145252469 |
| SPC24       | -0.928075601 | KCTD8       | -1.145044577 |
| FAM63B      | -0.927739551 | HCFC1       | -1.143604518 |

**Table S5** | Output of the RIGER algorithm for the initial A375 PLX screen comparing PLX (mean of the two replicates at day 14) to DMSO control (mean of the two replicates at day 14). The weighted sum method was used to convert sgRNAs to genes. Genes are sorted by RIGER rank.

| Gene       | # Hairpins | NES       | Gene rank | p-value  | p-value rank |
|------------|------------|-----------|-----------|----------|--------------|
| NF2        | 4          | 0.0007519 | 1         | 0.000004 | 2            |
| MED12      | 4          | 0.001131  | 2         | 0.000004 | 3            |
| CUL3       | 6          | 0.001218  | 3         | 0.000006 | 5            |
| CLDN10     | 4          | 0.001504  | 4         | 0.000005 | 4            |
| NF1        | 2          | 0.001812  | 5         | 0.000001 | 1            |
| TADA1      | 4          | 0.003295  | 6         | 0.000035 | 6            |
| TADA2B     | 3          | 0.004823  | 7         | 0.000046 | 7            |
| SPECC1     | 9          | 0.005485  | 8         | 0.000146 | 11           |
| CCDC101    | 3          | 0.006606  | 9         | 0.000082 | 8            |
| ALG3       | 4          | 0.006728  | 10        | 0.000118 | 9            |
| P4HB       | 3          | 0.009702  | 11        | 0.000189 | 12           |
| EED        | 4          | 0.0106    | 12        | 0.000313 | 15           |
| TAF6L      | 3          | 0.01063   | 13        | 0.000234 | 13           |
| MED15      | 4          | 0.01175   | 14        | 0.000382 | 17           |
| NPPC       | 6          | 0.01229   | 15        | 0.000575 | 24           |
| TAF5L      | 2          | 0.01247   | 16        | 0.000141 | 10           |
| PGD        | 3          | 0.013     | 17        | 0.000349 | 16           |
| LGALS4     | 4          | 0.01351   | 18        | 0.00051  | 22           |
| TAOK1      | 3          | 0.01431   | 19        | 0.000429 | 19           |
| CD320      | 6          | 0.01431   | 20        | 0.000824 | 30           |
| CCNC       | 5          | 0.01475   | 21        | 0.000735 | 25           |
| SMARCB1    | 3          | 0.01552   | 22        | 0.000501 | 21           |
| ASIC1      | 6          | 0.0162    | 23        | 0.001042 | 34           |
| MED19      | 4          | 0.01662   | 24        | 0.000754 | 27           |
| GADD45GIP1 | 4          | 0.01713   | 25        | 0.000795 | 29           |
| MED23      | 2          | 0.01827   | 26        | 0.000301 | 14           |
| ZDHC15     | 4          | 0.01909   | 27        | 0.000988 | 33           |
| TWF2       | 6          | 0.01926   | 28        | 0.001489 | 41           |
| ADRA2B     | 3          | 0.02072   | 29        | 0.000873 | 31           |
| PDC        | 6          | 0.02089   | 30        | 0.001707 | 50           |
| KCTD10     | 3          | 0.02106   | 31        | 0.000896 | 32           |
| MFSD9      | 2          | 0.0211    | 32        | 0.000419 | 18           |
| TXNDC17    | 4          | 0.02167   | 33        | 0.00128  | 38           |
| MED16      | 4          | 0.02186   | 34        | 0.001299 | 40           |
| TADA3      | 2          | 0.02199   | 35        | 0.000455 | 20           |
| PDCD10     | 5          | 0.02261   | 36        | 0.001744 | 51           |
| TNFRSF17   | 4          | 0.02341   | 37        | 0.001491 | 42           |
| DARS       | 6          | 0.02349   | 38        | 0.002111 | 61           |
| ELMOD1     | 2          | 0.0235    | 39        | 0.000523 | 23           |
| ARID1A     | 4          | 0.02355   | 40        | 0.001505 | 43           |
| GNB2L1     | 4          | 0.02396   | 41        | 0.001556 | 44           |
| SCPEP1     | 4          | 0.02439   | 42        | 0.001613 | 45           |
| KEAP1      | 4          | 0.02458   | 43        | 0.001632 | 47           |
| NCOR2      | 4          | 0.02481   | 44        | 0.00166  | 48           |
| OR2T33     | 3          | 0.02498   | 45        | 0.001231 | 37           |
| BCL2L12    | 4          | 0.02546   | 46        | 0.001761 | 53           |
| SPOPL      | 3          | 0.0256    | 47        | 0.001289 | 39           |
| FGGY       | 6          | 0.0256    | 48        | 0.002495 | 68           |
| CA7        | 6          | 0.02599   | 49        | 0.002567 | 69           |
| JMJD4      | 6          | 0.02614   | 50        | 0.002601 | 70           |
| MYO9B      | 4          | 0.02679   | 51        | 0.001952 | 57           |
| FAM19A4    | 6          | 0.02705   | 52        | 0.002769 | 76           |
| EBF4       | 4          | 0.02722   | 53        | 0.002002 | 59           |
| TTC4       | 5          | 0.02815   | 54        | 0.002705 | 74           |
| DPH2       | 6          | 0.02815   | 55        | 0.00298  | 82           |
| DRAP1      | 4          | 0.02815   | 56        | 0.002136 | 62           |
| C1orf49    | 7          | 0.02818   | 57        | 0.003353 | 87           |
| ATXN2L     | 2          | 0.02843   | 58        | 0.000746 | 26           |
| CCT8       | 2          | 0.02869   | 59        | 0.000757 | 28           |
| INA        | 4          | 0.0287    | 60        | 0.00224  | 64           |
| SPRED1     | 3          | 0.02928   | 61        | 0.001682 | 49           |
| FAM205A    | 3          | 0.02985   | 62        | 0.001761 | 52           |
| ZNF679     | 4          | 0.02985   | 63        | 0.002404 | 66           |
| RARRRES1   | 5          | 0.03018   | 64        | 0.003121 | 86           |
| OXR1       | 12         | 0.03056   | 65        | 0.004951 | 111          |
| ABC5       | 9          | 0.03079   | 66        | 0.004499 | 103          |

|          |   |         |     |          |     |
|----------|---|---------|-----|----------|-----|
| PCIF1    | 3 | 0.03083 | 67  | 0.00186  | 54  |
| TSPAN1   | 4 | 0.03109 | 68  | 0.002605 | 71  |
| GEN1     | 4 | 0.03128 | 69  | 0.002637 | 72  |
| EIF3D    | 4 | 0.03135 | 70  | 0.00265  | 73  |
| CD4      | 4 | 0.0317  | 71  | 0.002719 | 75  |
| RASGEF1C | 3 | 0.03173 | 72  | 0.001958 | 58  |
| RFX4     | 8 | 0.03174 | 73  | 0.004515 | 104 |
| EP300    | 4 | 0.03223 | 74  | 0.002802 | 77  |
| MMS19    | 4 | 0.0323  | 75  | 0.002818 | 78  |
| HEBP1    | 4 | 0.03287 | 76  | 0.002925 | 80  |
| DOK2     | 3 | 0.03288 | 77  | 0.00211  | 60  |
| BRD9     | 7 | 0.03336 | 78  | 0.004695 | 109 |
| MAP1LC3A | 3 | 0.03376 | 79  | 0.002217 | 63  |
| GPR123   | 2 | 0.0343  | 80  | 0.001072 | 35  |
| FH       | 6 | 0.03453 | 81  | 0.004382 | 102 |
| NUGGC    | 3 | 0.03519 | 82  | 0.002409 | 67  |
| OR52E2   | 2 | 0.03523 | 83  | 0.001141 | 36  |
| CRNN     | 6 | 0.03558 | 84  | 0.004655 | 107 |
| HDAC6    | 4 | 0.03565 | 85  | 0.003451 | 88  |
| AHCYL2   | 6 | 0.03793 | 86  | 0.005333 | 117 |
| ZC3H18   | 3 | 0.03821 | 87  | 0.002841 | 79  |
| RG52     | 5 | 0.0384  | 88  | 0.005052 | 113 |
| TMED3    | 3 | 0.03892 | 89  | 0.00293  | 81  |
| TXNIP    | 5 | 0.03944 | 90  | 0.005299 | 116 |
| MLN      | 3 | 0.03958 | 91  | 0.003008 | 83  |
| CLEC2B   | 3 | 0.03965 | 92  | 0.003019 | 84  |
| CASQ2    | 3 | 0.03991 | 93  | 0.003063 | 85  |
| GMDS     | 6 | 0.04171 | 94  | 0.006445 | 141 |
| UBE2M    | 2 | 0.0418  | 95  | 0.001626 | 46  |
| RNF7     | 5 | 0.0423  | 96  | 0.006005 | 129 |
| CRYGN    | 3 | 0.04249 | 97  | 0.003478 | 89  |
| NDUFA8   | 3 | 0.04313 | 98  | 0.003571 | 90  |
| NCL      | 5 | 0.04333 | 99  | 0.006281 | 133 |
| PLK4     | 5 | 0.04346 | 100 | 0.006321 | 134 |

**Table S6** | Output of the RIGER algorithm for the transduction replicate A375 PLX screen comparing PLX (mean of the two replicates at day 14) to DMSO control (mean of the two replicates at day 14). The weighted sum method was used to convert sgRNAs to genes. Genes are sorted by RIGER rank.

| Gene     | # Hairpins | NES       | Gene rank | p-value  | p-value rank |
|----------|------------|-----------|-----------|----------|--------------|
| MED12    | 4          | 0.00051   | 1         | 0.000002 | 1            |
| CUL3     | 6          | 0.0008262 | 2         | 0.000002 | 2            |
| NF2      | 4          | 0.001589  | 3         | 0.000005 | 3            |
| TADA1    | 4          | 0.00185   | 4         | 0.000007 | 4            |
| TADA2B   | 3          | 0.00213   | 5         | 0.00001  | 5            |
| RBL1     | 3          | 0.004575  | 6         | 0.000041 | 6            |
| TAF6L    | 3          | 0.006689  | 7         | 0.000085 | 8            |
| OR8S1    | 4          | 0.008042  | 8         | 0.000157 | 10           |
| MED23    | 2          | 0.009179  | 9         | 0.000081 | 7            |
| SLC41A3  | 4          | 0.009526  | 10        | 0.000244 | 14           |
| CCDC101  | 3          | 0.01002   | 11        | 0.000201 | 11           |
| LCOR     | 4          | 0.01057   | 12        | 0.00031  | 17           |
| GPR98    | 3          | 0.01074   | 13        | 0.000239 | 13           |
| KCNA2    | 8          | 0.01187   | 14        | 0.000666 | 27           |
| MED15    | 4          | 0.01231   | 15        | 0.000416 | 18           |
| MT1F     | 2          | 0.01255   | 16        | 0.000141 | 9            |
| MYL7     | 4          | 0.01261   | 17        | 0.000445 | 20           |
| SLC7A11  | 5          | 0.01288   | 18        | 0.000554 | 23           |
| MTRF1    | 3          | 0.0145    | 19        | 0.000445 | 19           |
| ELF1     | 3          | 0.01465   | 20        | 0.000454 | 21           |
| METAP1D  | 4          | 0.01479   | 21        | 0.000612 | 25           |
| FAM160A2 | 4          | 0.01497   | 22        | 0.000623 | 26           |
| TAF5L    | 2          | 0.0154    | 23        | 0.000207 | 12           |
| NF1      | 2          | 0.01711   | 24        | 0.000261 | 15           |
| DSEL     | 2          | 0.01782   | 25        | 0.000287 | 16           |
| RAP1GAP2 | 4          | 0.01915   | 26        | 0.000992 | 29           |
| MPG      | 6          | 0.0197    | 27        | 0.001548 | 41           |
| MED16    | 4          | 0.02023   | 28        | 0.001103 | 31           |
| XKR4     | 4          | 0.02069   | 29        | 0.001163 | 32           |
| ERP27    | 4          | 0.02156   | 30        | 0.001269 | 35           |
| MAB21L2  | 3          | 0.02162   | 31        | 0.000938 | 28           |
| ASIC5    | 5          | 0.02172   | 32        | 0.001596 | 42           |
| MSMB     | 5          | 0.02184   | 33        | 0.001613 | 43           |
| ZNF182   | 4          | 0.02211   | 34        | 0.001328 | 37           |
| ZNF345   | 2          | 0.02256   | 35        | 0.000479 | 22           |
| TNFSF18  | 4          | 0.02276   | 36        | 0.00141  | 39           |
| NDUFAF2  | 3          | 0.02312   | 37        | 0.001063 | 30           |
| PDCCD10  | 5          | 0.02319   | 38        | 0.001844 | 49           |
| CCNC     | 5          | 0.02425   | 39        | 0.002022 | 52           |
| SPRED1   | 3          | 0.02451   | 40        | 0.001188 | 33           |
| GDPD2    | 6          | 0.02456   | 41        | 0.002293 | 57           |
| DYRK3    | 4          | 0.02457   | 42        | 0.001629 | 44           |
| MBP      | 9          | 0.02489   | 43        | 0.002965 | 71           |
| PARP3    | 3          | 0.02518   | 44        | 0.001243 | 34           |
| UBE2M    | 2          | 0.02542   | 45        | 0.000595 | 24           |
| HDGF     | 3          | 0.02545   | 46        | 0.00127  | 36           |
| KCNC2    | 7          | 0.02554   | 47        | 0.002731 | 66           |
| GALNS    | 4          | 0.02604   | 48        | 0.00184  | 47           |
| METTL21B | 4          | 0.02605   | 49        | 0.001842 | 48           |
| BTBD17   | 3          | 0.02641   | 50        | 0.001371 | 38           |
| HSD11B1  | 5          | 0.02689   | 51        | 0.002482 | 61           |
| LGR5     | 4          | 0.02892   | 52        | 0.002269 | 56           |
| BUB1B    | 4          | 0.02924   | 53        | 0.0023   | 58           |
| MRFAP1L1 | 3          | 0.02926   | 54        | 0.00168  | 45           |
| CCDC83   | 4          | 0.02932   | 55        | 0.002316 | 59           |
| DRAP1    | 4          | 0.02937   | 56        | 0.002321 | 60           |
| RELT     | 3          | 0.02984   | 57        | 0.001756 | 46           |
| RANBP9   | 3          | 0.0307    | 58        | 0.001849 | 50           |
| HMMR     | 4          | 0.03099   | 59        | 0.002589 | 64           |
| MALSU1   | 3          | 0.03115   | 60        | 0.001886 | 51           |
| TACC1    | 6          | 0.03181   | 61        | 0.003733 | 94           |
| HOXC13   | 4          | 0.03205   | 62        | 0.00277  | 67           |
| EAPP     | 4          | 0.03259   | 63        | 0.002875 | 68           |
| C1QA     | 6          | 0.03263   | 64        | 0.003918 | 99           |
| SELRC1   | 3          | 0.03276   | 65        | 0.00209  | 53           |
| B3GALNT2 | 6          | 0.03279   | 66        | 0.003962 | 101          |

|          |   |         |     |          |     |
|----------|---|---------|-----|----------|-----|
| RBM15B   | 3 | 0.03299 | 67  | 0.002127 | 54  |
| PDE12    | 6 | 0.03326 | 68  | 0.004098 | 104 |
| PAFAH2   | 6 | 0.03339 | 69  | 0.004132 | 106 |
| LAMA3    | 8 | 0.03369 | 70  | 0.005071 | 132 |
| TDRD5    | 6 | 0.03397 | 71  | 0.004252 | 108 |
| MBNL2    | 4 | 0.03435 | 72  | 0.003193 | 76  |
| ADI1     | 6 | 0.03487 | 73  | 0.004464 | 111 |
| MED19    | 4 | 0.03523 | 74  | 0.003361 | 81  |
| PRKRA    | 5 | 0.03524 | 75  | 0.004253 | 109 |
| ATP1B4   | 4 | 0.03532 | 76  | 0.003379 | 83  |
| PRR7     | 4 | 0.03545 | 77  | 0.003414 | 84  |
| GBP2     | 6 | 0.03557 | 78  | 0.004654 | 116 |
| KCTD15   | 4 | 0.03616 | 79  | 0.003546 | 87  |
| MAPKAPK3 | 4 | 0.03631 | 80  | 0.003576 | 89  |
| MRPS12   | 3 | 0.0364  | 81  | 0.002585 | 63  |
| TNR      | 6 | 0.03661 | 82  | 0.004941 | 127 |
| PET117   | 3 | 0.03666 | 83  | 0.002611 | 65  |
| SRM      | 5 | 0.03672 | 84  | 0.004589 | 114 |
| INO80E   | 4 | 0.03707 | 85  | 0.003727 | 93  |
| ZSWIM6   | 4 | 0.0372  | 86  | 0.003755 | 95  |
| SLC4A3   | 6 | 0.03732 | 87  | 0.005147 | 134 |
| CDKL4    | 4 | 0.03795 | 88  | 0.003903 | 98  |
| EED      | 4 | 0.03863 | 89  | 0.004041 | 103 |
| MRPL17   | 3 | 0.03885 | 90  | 0.002918 | 69  |
| ANGEL2   | 5 | 0.03886 | 91  | 0.005154 | 135 |
| PLK1     | 4 | 0.03896 | 92  | 0.00412  | 105 |
| CARS2    | 3 | 0.03954 | 93  | 0.003005 | 72  |
| PODN     | 6 | 0.03971 | 94  | 0.005858 | 150 |
| AMPD2    | 6 | 0.03997 | 95  | 0.005936 | 151 |
| TRIM67   | 2 | 0.04032 | 96  | 0.001521 | 40  |
| ACOX1    | 3 | 0.04046 | 97  | 0.003153 | 74  |
| PRPF4B   | 3 | 0.04046 | 98  | 0.003153 | 75  |
| TCEB2    | 4 | 0.04073 | 99  | 0.004475 | 112 |
| VAX1     | 5 | 0.04079 | 100 | 0.005648 | 147 |



**Table S7 | Comparison of the top 20 hits between the two A375 PLX infection replicate screens by RIGER rank.** RNAi gene enrichment ranking (RIGER) uses a two-sample weighted likelihood ratio test to measure the support for a gene using the enrichment of the sgRNAs (or shRNAs) for each gene.

| 1st infection |            |                 | 2nd infection |            |                 |
|---------------|------------|-----------------|---------------|------------|-----------------|
| Gene symbol   | RIGER rank | RIGER $p$ value | Gene symbol   | RIGER rank | RIGER $p$ value |
| NF2           | 1          | 0.000004        | MED12         | 1          | 0.000002        |
| MED12         | 2          | 0.000004        | CUL3          | 2          | 0.000002        |
| CUL3          | 3          | 0.000006        | NF2           | 3          | 0.000005        |
| CLDN10        | 4          | 0.000005        | TADA1         | 4          | 0.000007        |
| NF1           | 5          | 0.000001        | TADA2B        | 5          | 0.000001        |
| TADA1         | 6          | 0.000035        | RBL1          | 6          | 0.000041        |
| TADA2B        | 7          | 0.000046        | TAF6L         | 7          | 0.000085        |
| SPECC1        | 8          | 0.000146        | OR8S1         | 8          | 0.000157        |
| CCDC101       | 9          | 0.000082        | MED23         | 9          | 0.000081        |
| ALG3          | 10         | 0.000118        | SLC41A3       | 10         | 0.000244        |
| P4HB          | 11         | 0.000189        | CCDC101       | 11         | 0.000201        |
| EED           | 12         | 0.000313        | LCOR          | 12         | 0.00031         |
| TAF6L         | 13         | 0.000234        | GPR98         | 13         | 0.000239        |
| MED15         | 14         | 0.000382        | KCNA2         | 14         | 0.000666        |
| NPPC          | 15         | 0.000575        | MED15         | 15         | 0.000416        |
| TAF5L         | 16         | 0.000141        | MT1F          | 16         | 0.000141        |
| PGD           | 17         | 0.000349        | MYL7          | 17         | 0.000445        |
| LGALS4        | 18         | 0.00051         | SLC7A11       | 18         | 0.000554        |
| TAOK1         | 19         | 0.000429        | MTRF1         | 19         | 0.000445        |
| CD320         | 20         | 0.000824        | ELF1          | 20         | 0.000454        |

appears in the 20 top of other replicate infection

appears in the 100 top of other replicate infection

**Table S8 | Comparison of the top 20 hits between the two A375 PLX infection replicate screens by RSA rank.** Redundant siRNA activity (RSA) uses an enrichment cutoff and hypergeometric test to measure the support for a gene using the enrichment of the sgRNAs (or shRNAs) for each gene.

| 1st infection |          |                        | 2nd infection |          |                        |
|---------------|----------|------------------------|---------------|----------|------------------------|
| Gene symbol   | RSA rank | RSA log <i>p</i> value | Gene symbol   | RSA rank | RSA log <i>p</i> value |
| MED12         | 1        | -12.467                | MED12         | 1        | -11.954                |
| NF2           | 2        | -9.147                 | NF2           | 2        | -8.766                 |
| CUL3          | 3        | -8.578                 | CUL3          | 3        | -8.174                 |
| MED15         | 4        | -7.684                 | TADA2B        | 4        | -6.512                 |
| TADA2B        | 5        | -7.418                 | CCDC101       | 5        | -6.319                 |
| RBL1          | 6        | -6.316                 | DPH2          | 6        | -6.141                 |
| TADA1         | 7        | -5.815                 | MED15         | 7        | -5.609                 |
| CCNC          | 8        | -5.483                 | NF1           | 8        | -5.418                 |
| CCDC101       | 9        | -5.313                 | CLDN10        | 9        | -5.174                 |
| PDCD10        | 10       | -5.278                 | PGD           | 10       | -4.944                 |
| NOTCH2NL      | 11       | -4.988                 | TADA1         | 11       | -4.909                 |
| PCLO          | 12       | -4.971                 | ZEB2          | 12       | -4.892                 |
| PPP1R8        | 13       | -4.947                 | CCNC          | 13       | -4.697                 |
| C1QA          | 14       | -4.667                 | TAF6L         | 14       | -4.402                 |
| DR1           | 15       | -4.311                 | SMARCB1       | 15       | -4.371                 |
| KCTD10        | 16       | -4.284                 | BCL2L12       | 16       | -4.228                 |
| PDE12         | 17       | -4.236                 | PDCD10        | 17       | -4.16                  |
| SLC25A17      | 18       | -4.209                 | GADD45GIP1    | 18       | -4.107                 |
| BRD9          | 19       | -4.206                 | ZNF592        | 19       | -4.037                 |
| PET117        | 20       | -4.168                 | ACTA2         | 20       | -4.033                 |

appears in the 20 top of other replicate infection

appears in the 100 top of other replicate infection

**Table S9 | Cas9-sgRNA array screening constructs used.** Names and targeting sequence for all Cas9-sgRNA constructs used for validation in A375 screen. Cas9-sgRNAs with *names in italics* are contained in the GeCKO library.

| <b>Name</b>            | <b>sgRNA 20bp sequence</b> |
|------------------------|----------------------------|
| <i>NF2_sg1</i>         | AAACATCTCGTACAGTGACA       |
| <i>NF2_sg2</i>         | ATTCCACGGGAAGGAGATCT       |
| <i>NF2_sg3</i>         | CCTGGCTTCTTACGCCGTCC       |
| <i>NF2_sg4</i>         | GTACTIONCAGTCCAAAGAACC     |
| <i>NF2_sg5</i>         | CACAGTGGCCTGGCTCAAAA       |
| <i>MED12_sg1</i>       | AGGATTGAAGCTGACGTTCT       |
| <i>MED12_sg2</i>       | CGTCAGCTTCAATCCTGCCA       |
| <i>MED12_sg3</i>       | CTCAGAGATTGCTGCATAGT       |
| <i>MED12_sg4</i>       | ACAGGTCATCTTAATGAGCC       |
| <i>MED12_sg5</i>       | GGGGCTGTGGTTCCACGATA       |
| <i>NF1_sg1</i>         | GTTGTGCTCAGTACTGACTT       |
| <i>NF1_sg2</i>         | ACACTGGAAAAATGTCTTGC       |
| <i>NF1_sg3</i>         | AGTCAGTACTGAGCACAACA       |
| <i>CUL3_sg1</i>        | CTTACCTGGATATAGTCAAC       |
| <i>CUL3_sg2</i>        | GAATCCTGTTGACTATATCC       |
| <i>CUL3_sg3</i>        | GACCTAAAATCATTAAACATC      |
| <i>CUL3_sg4</i>        | TGCCAGATGTTAATGATTTT       |
| <i>CUL3_sg5</i>        | TTATTTAGTCGTGTGCCAAA       |
| <i>TADA1_sg1</i>       | ACTGGGCTAACCTAAAGCTG       |
| <i>TADA1_sg2</i>       | TCTGCTTGAACCACAGCTTT       |
| <i>TADA1_sg3</i>       | GGAGGAAATCATTGTGAGAA       |
| <i>TADA1_sg4</i>       | TCTTTAGTGCAATCAGAATC       |
| <i>TADA2B_sg1</i>      | ACGGCGGGCGCTTACGCTC        |
| <i>TADA2B_sg2</i>      | GCCATCGAGCAGTTCGGCTT       |
| <i>TADA2B_sg3</i>      | GCACCTTCTCGGATCTGAC        |
| <i>TADA2B_sg4</i>      | GCTCCTGTCAGATCGCGAGA       |
| Control_sg1 (EGFP_sg5) | GAAGTTCGAGGGCGACACCC       |
| Control_sg2 (EGFP_sg6) | GGTGAACCGCATCGAGCTGA       |

**Table S10 | shRNA array screening constructs used.** Names and The RNAi Consortium (TRC) identification numbers for all shRNA constructs used for validation in A375 screen.

| <b>Name</b> | <b>TRC ID</b>  | <b>Targeting Sequence</b> |
|-------------|----------------|---------------------------|
| NF2_sh1     | TRCN0000010397 | GAAGCAACCCAAGACGTTCCAC    |
| NF2_sh2     | TRCN0000018338 | TAGTTCTCTGACCTGAGTCTT     |
| NF2_sh3     | TRCN0000039974 | GCTCTGGATATTCTGCACAAT     |
| NF2_sh4     | TRCN0000039975 | GCTTCGTGTTAATAAGCTGAT     |
| MED12_sh1   | TRCN0000018574 | GCAGCATTATTGCAGAGAAAT     |
| MED12_sh2   | TRCN0000018575 | GCTGTTCTCAAGGCTGTGTTT     |
| MED12_sh3   | TRCN0000018576 | CGGGTACTTCATACTTTGGAA     |
| MED12_sh4   | TRCN0000018578 | GCAGAGAAATTACGTTGTAAT     |
| NF1_sh1     | TRCN0000039714 | GCCAACCTTAACCTTTCTAAT     |
| NF1_sh2     | TRCN0000039715 | CCTCACAACAACCAACACTTT     |
| NF1_sh3     | TRCN0000039716 | CCTGACACTTACAACAGTCAA     |
| NF1_sh4     | TRCN0000039717 | GCTGGCAGTTTCAAACGTAAT     |
| TADA2B_sh1  | TRCN0000237951 | CGTGACTGTGAAGACTATTAT     |
| TADA2B_sh2  | TRCN0000237949 | ATGATTACGAGATCGAGTATG     |
| TADA2B_sh3  | TRCN0000237950 | ACATCGCCCGTGACTACAATC     |
| NullIT_1    | TRCN0000208001 | n/a                       |
| NullIT_2    | TRCN0000231782 | n/a                       |

## Supplementary References and Notes

1. B. Luo *et al.*, Highly parallel identification of essential genes in cancer cells. *PNAS* **105**, 20380 (Dec 23, 2008).
2. R. Konig *et al.*, A probability-based approach for the analysis of large-scale RNAi screens. *Nature methods* **4**, 847 (Oct, 2007).
3. H. Davies *et al.*, Mutations of the BRAF gene in human cancer. *Nature* **417**, 949 (Jun 27, 2002).
4. P. T. Wan *et al.*, Mechanism of activation of the RAF-ERK signaling pathway by oncogenic mutations of B-RAF. *Cell* **116**, 855 (Mar 19, 2004).
5. G. Bollag *et al.*, Clinical efficacy of a RAF inhibitor needs broad target blockade in BRAF-mutant melanoma. *Nature* **467**, 596 (Sep 30, 2010).
6. P. B. Chapman *et al.*, Improved survival with vemurafenib in melanoma with BRAF V600E mutation. *The New England journal of medicine* **364**, 2507 (Jun 30, 2011).
7. J. A. Sosman *et al.*, Survival in BRAF V600-mutant advanced melanoma treated with vemurafenib. *The New England journal of medicine* **366**, 707 (Feb 23, 2012).
8. K. T. Flaherty *et al.*, Inhibition of mutated, activated BRAF in metastatic melanoma. *The New England journal of medicine* **363**, 809 (Aug 26, 2010).
9. S. R. Whittaker *et al.*, A Genome-Scale RNA Interference Screen Implicates NF1 Loss in Resistance to RAF Inhibition. *Cancer Discovery* **3**, 350 (Apr 07, 2013).
10. S. Huang *et al.*, MED12 controls the response to multiple cancer drugs through regulation of TGF-beta receptor signaling. *Cell* **151**, 937 (Nov 21, 2012).
11. O. Maertens *et al.*, Elucidating distinct roles for NF1 in melanomagenesis. *Cancer Discov* **3**, 338 (Mar, 2013).
12. E. Romano *et al.*, Identification of Multiple Mechanisms of Resistance to Vemurafenib in a Patient with BRAFV600E-Mutated Cutaneous Melanoma Successfully Rechallenged after Progression. *Clinical cancer research : an official journal of the American Association for Cancer Research* **19**, 5749 (Oct 15, 2013).
13. R. Nazarian *et al.*, Melanomas acquire resistance to B-RAF(V600E) inhibition by RTK or N-RAS upregulation. *Nature* **468**, 973 (Dec 16, 2010).
14. A. B. Bianchi *et al.*, Mutations in transcript isoforms of the neurofibromatosis 2 gene in multiple human tumour types. *Nature genetics* **6**, 185 (Feb, 1994).
15. M. F. James *et al.*, NF2/merlin is a novel negative regulator of mTOR complex 1, and activation of mTORC1 is associated with meningioma and schwannoma growth. *Molecular and cellular biology* **29**, 4250 (Aug, 2009).
16. F. Yin *et al.*, Spatial organization of Hippo signaling at the plasma membrane mediated by the tumor suppressor Merlin/NF2. *Cell* **154**, 1342 (Sep 12, 2013).
17. L. B. Murray, Y. K. Lau, Q. Yu, Merlin is a negative regulator of human melanoma growth. *PloS one* **7**, e43295 (2012).
18. N. Cancer Genome Atlas Research, Comprehensive genomic characterization of squamous cell lung cancers. *Nature* **489**, 519 (Sep 27, 2012).
19. A. Ooi *et al.*, CUL3 and NRF2 mutations confer an NRF2 activation phenotype in a sporadic form of papillary renal cell carcinoma. *Cancer research* **73**, 2044 (Apr 1, 2013).
20. L. Grau *et al.*, A quantitative proteomic analysis uncovers the relevance of CUL3 in bladder cancer aggressiveness. *PloS one* **8**, e53328 (2013).
21. X. Liu, M. Vorontchikhina, Y. L. Wang, F. Faiola, E. Martinez, STAGA recruits Mediator to the MYC oncoprotein to stimulate transcription and cell proliferation. *Molecular and cellular biology* **28**, 108 (Jan, 2008).
22. L. A. Gilbert *et al.*, CRISPR-Mediated Modular RNA-Guided Regulation of Transcription in Eukaryotes. *Cell*, (Jul, 2013).
23. S. Konermann *et al.*, Optical control of mammalian endogenous transcription and epigenetic states. *Nature* **500**, 472 (Aug 22, 2013).
24. M. L. Maeder *et al.*, CRISPR RNA-guided activation of endogenous human genes. *Nature methods*, (Jul 25, 2013).
25. P. Mali *et al.*, CAS9 transcriptional activators for target specificity screening and paired nickases for cooperative genome engineering. *Nat Biotechnol* **31**, 833 (Sep, 2013).

26. P. Perez-Pinera *et al.*, RNA-guided gene activation by CRISPR-Cas9-based transcription factors. *Nature methods*, (Jul 25, 2013).
27. M. Jinek *et al.*, A programmable dual-RNA-guided DNA endonuclease in adaptive bacterial immunity. *Science* **337**, 816 (Aug 17, 2012).
28. G. Gasiunas, R. Barrangou, P. Horvath, V. Siksnys, Cas9-crRNA ribonucleoprotein complex mediates specific DNA cleavage for adaptive immunity in bacteria. *PNAS* **109**, E2579 (Sep 25, 2012).
29. E. M. Mendenhall *et al.*, Locus-specific editing of histone modifications at endogenous enhancers. *Nat Biotechnol*, (Sep 8, 2013).
30. L. Cong, R. Zhou, Y. C. Kuo, M. Cunniff, F. Zhang, Comprehensive interrogation of natural TALE DNA-binding modules and transcriptional repressor domains. *Nature communications* **3**, 968 (2012).
31. C. Trapnell, L. Pachter, S. L. Salzberg, TopHat: discovering splice junctions with RNA-Seq. *Bioinformatics* **25**, 1105 (May 1, 2009).
32. C. Trapnell *et al.*, Differential gene and transcript expression analysis of RNA-seq experiments with TopHat and Cufflinks. *Nature protocols* **7**, 562 (Mar, 2012).
33. J. Merkin, C. Russell, P. Chen, C. B. Burge, Evolutionary dynamics of gene and isoform regulation in Mammalian tissues. *Science* **338**, 1593 (Dec 21, 2012).
34. B. Langmead, C. Trapnell, M. Pop, S. L. Salzberg, Ultrafast and memory-efficient alignment of short DNA sequences to the human genome. *Genome biology* **10**, R25 (2009).
35. P. D. Hsu *et al.*, DNA targeting specificity of RNA-guided Cas9 nucleases. *Nat Biotechnol* **31**, 827 (Sep, 2013).
36. Y. Fu *et al.*, High-frequency off-target mutagenesis induced by CRISPR-Cas nucleases in human cells. *Nat Biotechnol* **31**, 822 (Sep, 2013).
37. F. A. Ran *et al.*, Genome engineering using the CRISPR-Cas9 system. *Nature protocols* **8**, 2281 (Nov, 2013).
